# Supplementary material for: Atlas of tissue renin-angiotensin-aldosterone system in human: A transcriptomic meta-analysis
Source: PubMed Central journal article supplement (PMC4445654; doi:10.1038/srep10035), 2015-05-20

**ATLAS OF TISSUE RENIN-ANGIOTENSIN-ALDOSTERONE SYSTEM IN HUMAN:  
A TRANSCRIPTOMIC META-ANALYSIS**

**Supplemental data**

Ali Nehme, Catherine Cerutti, Nedra Dhaouadi, Marie Paule Gustin, Pierre-Yves Courand,

Kazem Zibara\*, Giampiero Bricca\*.

\* Co-last and corresponding authors

Address correspondence to:

\* Dr Giampiero BRICCA, EA4173, Functional genomics of arterial hypertension, Université Lyon1,  
Domaine Rockefeller, 8 avenue Rockefeller, France; email: [giampiero.bricca@inserm.fr](mailto:giampiero.bricca@inserm.fr)

\*Dr Kazem ZIBARA, ER045, Laboratory of stem cells, Department of Biology, Faculty of Sciences,  
Lebanese University, Beirut – Lebanon; email: [kzibara@ul.edu.lb](mailto:kzibara@ul.edu.lb)

## Table of Contents

| #                       | Title                                                         | Page |
|-------------------------|---------------------------------------------------------------|------|
| Supplementary table S1  | Extended Renin-Angiotensin-Aldosterone System (ExtRAAS) genes | 3    |
| Supplementary table S2  | Detailed Inventory of Studied Datasets                        | 5    |
| Supplementary table S3  | Tissue Expression Profiles of ExtRAAS Genes                   | 11   |
| Supplementary table S4  | ExtRAAS Co-expression Modules in All 23 Studied Tissues       | 15   |
| Supplementary Figure S1 | ExtRAAS Genes Expression Profiles Across Studied Tissues      | 22   |
| Supplementary Atlas S1  | ExtRAAS Maps in All Studied Tissues                           | 28   |
|                         | Atlas template                                                | 29   |
|                         | Thyroid                                                       | 30   |
|                         | Embryo                                                        | 31   |
|                         | Liver                                                         | 32   |
|                         | Kidney                                                        | 33   |
|                         | Lung                                                          | 34   |
|                         | Heart                                                         | 35   |
|                         | Oral Mucosa                                                   | 36   |
|                         | Colorectal                                                    | 37   |
|                         | Ovary                                                         | 38   |
|                         | Skeletal Muscle                                               | 39   |
|                         | Skin                                                          | 40   |
|                         | Pancreas                                                      | 41   |
|                         | Breast                                                        | 42   |
|                         | Subcutaneous Adipose                                          | 43   |
|                         | Omental Adipose                                               | 44   |
|                         | Large Airways Epithelium                                      | 45   |
|                         | Small Airways Epithelium                                      | 46   |
|                         | Esophagus                                                     | 47   |
|                         | Lymphocytes                                                   | 48   |
|                         | Bone Marrow                                                   | 49   |
|                         | Leukocytes                                                    | 50   |
|                         | Total blood                                                   | 51   |
|                         | PBMC                                                          | 52   |

## **Supplementary Table S1: Extended renin-angiotensin-aldosterone system (ExtRAAS) gene**

**Supplementary Table S1: Extended renin-angiotensin-aldosterone system (ExtRAAS) gene.**

ExtRAAS constitute 37 genes; 25 encode for the renin-angiotensin system (RAS) components corresponding to angiotensinogen (AGT) 17 enzymes and 7 receptors; and 12 genes encode for corticosteroid system (COS) proteins corresponding to 9 enzymes and 3 receptors. Classical RAAS genes are annotated by an asterisk. RAS, renin-angiotensin system; COS, corticosteroid system; GeneID, gene refseq ID.

| System | Gene Symbol | Gene Description                                                          | GeneID |
|--------|-------------|---------------------------------------------------------------------------|--------|
| RAS    | ACE*        | angiotensin I converting enzyme (peptidyl-dipeptidase A) 1                | 1636   |
| RAS    | ACE2        | angiotensin I converting enzyme (peptidyl-dipeptidase A) 2                | 59272  |
| RAS    | AGT*        | angiotensinogen (serpin peptidase inhibitor, clade A, member 8)           | 183    |
| RAS    | AGTR1*      | angiotensin II receptor, type 1                                           | 185    |
| RAS    | AGTR2       | angiotensin II receptor, type 2                                           | 186    |
| RAS    | ANPEP       | alanyl (membrane) aminopeptidase                                          | 290    |
| RAS    | ATP6AP2     | ATPase, H+ transporting, lysosomal accessory protein 2                    | 10159  |
| RAS    | CMA1        | chymase 1, mast cell                                                      | 1215   |
| RAS    | CPA3        | carboxypeptidase A3 (mast cell)                                           | 1359   |
| RAS    | CTSA        | cathepsin A                                                               | 5476   |
| RAS    | CTSD        | cathepsin D                                                               | 1509   |
| RAS    | CTSG        | cathepsin G                                                               | 1511   |
| RAS    | DPP3        | dipeptidyl-peptidase 3                                                    | 10072  |
| RAS    | EGFR        | epidermal growth factor receptor                                          | 1956   |
| RAS    | ENPEP       | glutamyl aminopeptidase (aminopeptidase A)                                | 2028   |
| RAS    | IGF2R       | insulin-like growth factor 2 receptor                                     | 3482   |
| RAS    | KLK1        | kallikrein 1                                                              | 3816   |
| RAS    | LNPEP       | leucyl/cystinyl aminopeptidase                                            | 4012   |
| RAS    | MAS1        | MAS1 oncogene                                                             | 4142   |
| RAS    | MME         | membrane metallo-endopeptidase                                            | 4311   |
| RAS    | NLN         | neurolysin (metallopeptidase M3 family)                                   | 57486  |
| RAS    | PREP        | prolyl endopeptidase                                                      | 5550   |
| RAS    | REN*        | renin                                                                     | 5972   |
| RAS    | RNPEP       | arginyl aminopeptidase (aminopeptidase B)                                 | 6051   |
| RAS    | THOP1       | thimet oligopeptidase 1                                                   | 7064   |
| COS    | AKR1C4      | aldo-keto reductase family 1, member C4                                   | 1109   |
| COS    | AKR1D1      | aldo-keto reductase family 1, member D1                                   | 6718   |
| COS    | CYP11A1     | cytochrome P450, family 11, subfamily A, polypeptide 1                    | 1583   |
| COS    | CYP11B1     | cytochrome P450, family 11, subfamily B, polypeptide 1                    | 1584   |
| COS    | CYP11B2*    | cytochrome P450, family 11, subfamily B, polypeptide 2                    | 1585   |
| COS    | CYP17A1     | cytochrome P450, family 17, subfamily A, polypeptide 1                    | 1586   |
| COS    | CYP21A2     | cytochrome P450, family 21, subfamily A, polypeptide 2                    | 1589   |
| COS    | GPER        | G protein-coupled estrogen receptor 1                                     | 2852   |
| COS    | HSD11B1     | hydroxysteroid (11-beta) dehydrogenase 1                                  | 3290   |
| COS    | HSD11B2*    | hydroxysteroid (11-beta) dehydrogenase 2                                  | 3291   |
| COS    | NR3C1       | nuclear receptor subfamily 3, group C, member 1 (glucocorticoid receptor) | 2908   |
| COS    | NR3C2*      | nuclear receptor subfamily 3, group C, member 2                           | 4306   |

## Supplementary Table S2: Detailed Inventory of Studied Datasets

**Supplementary Table S2: Detailed inventory of studied datasets.** Dataset ID: data set accession number in Gene expression omnibus (GEO) database; Platform ID: GEO accession number of platform; species: species from which tissues where obtained; Normal: number of normal samples in the dataset; Algorithm: normalization method used by authors; Cut height: the level at which the dendrogram was cut; MAC: mean agglomerative coefficient of dendrogram.

Nehme et al: Atlas of Tissue Renin-Angiotensin-Aldosterone System (RAAS) in Human

| Dataset ID | Platform ID | Species      | Tissue   | Normal | algorithm      | Cut height | MAC  |
|------------|-------------|--------------|----------|--------|----------------|------------|------|
| GSE18723   | GPL96       | Homo Sapiens | B cells  | 40     | MAS 5          | 0.9        | 0.47 |
| GSE16028   | GPL570      | Homo Sapiens | Blood    | 109    | Quantile       | 0.82       | 0.48 |
| GSE46480   | GPL570      | Homo Sapiens | Blood    | 98     | Quantile       | 0.767      | 0.74 |
| GSE10041   | GPL570      | Homo Sapiens | Blood    | 72     | Global scaling | 0.8        | 0.66 |
| GSE19743   | GPL570      | Homo Sapiens | Blood    | 63     | MBEI           | 0.8        | 0.63 |
| GSE33580   | GPL570      | Homo Sapiens | Blood    | 43     | MAS 5          | 0.89       | 0.57 |
| GSE26049   | GPL570      | Homo Sapiens | Blood    | 42     | RMA            | 0.9        | 0.67 |
| GSE27263   | GPL570      | Homo Sapiens | Blood    | 26     | RMA            | 0.82       | 0.79 |
| GSE45536   | GPL570      | Homo Sapiens | Blood    | 24     | RMA            | 0.987      | 0.71 |
| GSE19314   | GPL570      | Homo sapiens | Blood    | 21     | RMA            | 0.88       | 0.68 |
| GSE22255   | GPL570      | Homo sapiens | Blood    | 20     | RMA            | 0.93       | 0.71 |
| GSE28750   | GPL570      | Homo Sapiens | Blood    | 20     | RMA            | 0.9        | 0.8  |
| GSE37171   | GPL570      | Homo Sapiens | Blood    | 20     | RMA            | 0.8        | 0.8  |
| GSE33341   | GPL571      | Homo sapiens | Blood    | 43     | RMA            | 1          | 0.73 |
| GSE21592   | GPL571      | Homo sapiens | Blood    | 20     | RMA            | 1          | 0.83 |
| GSE47199   | GPL6244     | Homo Sapiens | Blood    | 21     | RMA            | 0.76       | 0.85 |
| GSE12288   | GPL96       | Homo sapiens | Blood    | 112    | MAS 5.0        | 0.785      | 0.56 |
| GSE14795   | GPL96       | Homo Sapiens | Blood    | 20     | MAS 5.0        | 0.94       | 0.62 |
| GSE45460   | GPL6244     | Homo Sapiens | BM cells | 31     | RMA            | 1          | 0.84 |
| GSE11504   | GPL570      | Homo Sapiens | BM cells | 25     | RMA            | 1          | 0.79 |
| GSE16334   | GPL96       | Homo Sapiens | BM cells | 11     | RMA            | 1.02       | 0.84 |
| GSE32719   | GPL570      | Homo Sapiens | BM cells | 27     | RMA            | 0.88       | 0.58 |
| GSE24870   | GPL571      | Homo Sapiens | BM cells | 20     | MAS 5          | 1.033      | 0.75 |
| GSE35010   | GPL6244     | Homo Sapiens | BM cells | 16     | RMA            | 0.875      | 0.86 |
| GSE19429   | GPL570      | Homo Sapiens | BM cells | 17     | RMA            | 1          | 0.81 |
| GSE39540   | GPL571      | Homo Sapiens | BM cells | 61     | Quantile       | 1          | 0.74 |
| GSE29431   | GPL570      | Homo Sapiens | Breast   | 12     | RMA            | 1          | 0.86 |
| GSE42568   | GPL570      | Homo Sapiens | Breast   | 17     | gcRMA          | 1          | 0.78 |
| GSE5364    | GPL96       | Homo sapiens | Breast   | 13     | Global scaling | 1          | 0.8  |

Nehme et al: Atlas of Tissue Renin-Angiotensin-Aldosterone System (RAAS) in Human

| Dataset ID | Platform ID | Species      | Tissue                  | Normal | algorithm              | Cut height | MAC  |
|------------|-------------|--------------|-------------------------|--------|------------------------|------------|------|
| GSE20437   | GPL96       | Homo sapiens | Breast                  | 24     | MAS 5,0                | 0.8        | 0.74 |
| GSE21947   | GPL96       | Homo Sapiens | Breast                  | 30     | Mean expression        | 1.03       | 0.75 |
| GSE10780   | GPL570      | Homo Sapiens | Breast                  | 143    | RMA                    | 0.83       | 0.65 |
| GSE31773   | GPL570      | Homo Sapiens | CD8 & CD4               | 17     | RMA                    | 1          | 0.85 |
| GSE41328   | GPL570      | Homo sapiens | colon                   | 10     | PLIER                  | 1          | 0.82 |
| GSE13367   | GPL570      | Homo sapiens | colonic mucosa          | 38     | RMA                    | 1          | 0.77 |
| GSE37364   | GPL570      | Homo sapiens | colonic mucosa          | 38     | MAS 5,0                | 0.91       | 0.63 |
| GSE24514   | GPL96       | Homo sapiens | colonic mucosa          | 15     | Quantile               | 0.92       | 0.77 |
| GSE22598   | GPL570      | Homo Sapiens | Colorectal              | 17     | RMA                    | 1          | 0.8  |
| GSE23878   | GPL570      | Homo sapiens | Colorectal              | 24     | PLIER                  | 1          | 0.75 |
| GSE32323   | GPL570      | Homo Sapiens | Colorectal              | 17     | RMA                    | 1          | 0.8  |
| GSE9348    | GPL570      | Homo Sapiens | Colorectal              | 12     | Global scaling         | 1.12       | 0.79 |
| GSE15744   | GPL570      | Homo sapiens | Embryo                  | 18     | Global scaling         | 1          | 0.72 |
| GSE18290   | GPL570      | Homo sapiens | Embryo                  | 18     | dChip signal intensity | 0.81       | 0.79 |
| GSE18887   | GPL96       | Homo sapiens | Embryo                  | 18     | RMA                    | 1          | 0.79 |
| GSE20347   | GPL571      | Homo Sapiens | Esophagus               | 17     | RMA                    | 1          | 0.8  |
| GSE23400   | GPL96       | Homo Sapiens | Esophagus               | 53     | RMA                    | 0.92       | 0.75 |
| GSE5364    | GPL96       | Homo sapiens | Esophagus               | 13     | Global scaling         | 1          | 0.83 |
| GSE16134   | GPL570      | Homo Sapiens | Gingiva                 | 70     | RMA                    | 0.93       | 0.71 |
| GSE10334   | GPL570      | Homo Sapiens | Gingiva                 | 64     | RMA                    | 1          | 0.71 |
| GSE22253   | GPL6244     | Homo Sapiens | Heart                   | 108    | gcRMA                  | 1          | 0.65 |
| GSE22459   | GPL570      | Homo Sapiens | Kidney                  | 25     | MAS 5                  | 1.08       | 0.75 |
| GSE9489    | GPL570      | Homo Sapiens | Kidney                  | 13     | Global scaling         | 1.08       | 0.78 |
| GSE15641   | GPL96       | Homo Sapiens | Kidney                  | 23     | dChip                  | 1          | 0.8  |
| GSE11906   | GPL570      | Homo Sapiens | Large airway epithelium | 21     | RMA                    | 1          | 0.6  |
| GSE10135   | GPL570      | Homo Sapiens | Large airway epithelium | 21     | Global scaling         | 1          | 0.6  |
| GSE16696   | GPL570      | Homo sapiens | Large airway epithelium | 20     | Global scaling         | 1          | 0.64 |
| GSE18637   | GPL570      | Homo sapiens | Large airway epithelium | 20     | Global scaling         | 1          | 0.67 |
| GSE22047   | GPL570      | Homo sapiens | Large airway epithelium | 19     | Global scaling         | 1.01       | 0.64 |

Nehme et al: Atlas of Tissue Renin-Angiotensin-Aldosterone System (RAAS) in Human

| Dataset ID | Platform ID | Species      | Tissue                   | Normal | algorithm            | Cut height | MAC  |
|------------|-------------|--------------|--------------------------|--------|----------------------|------------|------|
| GSE11375   | GPL570      | Homo Sapiens | Leukocytes               | 26     | Global scaling       | 0.85       | 0.75 |
| GSE38941   | GPL570      | Homo sapiens | Liver                    | 10     | Median normalization | 0.9        | 0.77 |
| GSE45267   | GPL570      | Homo Sapiens | Liver                    | 41     | gcRMA                | 1          | 0.73 |
| GSE29721   | GPL570      | Homo Sapiens | Liver                    | 10     | RMA                  | 1          | 0.85 |
| GSE14323   | GPL571      | Homo Sapiens | Liver                    | 19     | RMA                  | 1.08       | 0.8  |
| GSE41258   | GPL96       | Homo sapiens | Liver                    | 13     | LOWSESS              | 0.92       | 0.77 |
| GSE19804   | GPL570      | Homo sapiens | Lung tissue              | 60     | RMA                  | 1          | 0.68 |
| GSE18842   | GPL570      | Homo sapiens | Lung tissue              | 45     | RMA                  | 1          | 0.69 |
| GSE31552   | GPL6244     | Homo sapiens | Lung tissue              | 36     | RMA                  | 1          | 0.83 |
| GSE31547   | GPL96       | Homo sapiens | Lung tissue              | 20     | Quantile             | 1          | 0.74 |
| GSE10072   | GPL96       | Homo Sapiens | Lung tissue              | 49     | RMA                  | 0.785      | 0.75 |
| GSE29819   | GPL570      | Homo sapiens | Myocardial               | 12     | MAS 5.0              | 1          | 0.7  |
| GSE12485   | GPL570      | Homo sapiens | Myocardial               | 10     | RMA                  | 1.09       | 0.78 |
| GSE12486   | GPL570      | Homo sapiens | Myocardial               | 10     | RMA                  | 1          | 0.83 |
| GSE20950   | GPL570      | Homo Sapiens | Omental adipose          | 11     | RMA                  | 0.567      | 0.84 |
| GSE41168   | GPL570      | Homo Sapiens | Omental adipose          | 35     | RMA                  | 0.965      | 0.66 |
| GSE20571   | GPL6244     | Homo Sapiens | Omental adipose          | 14     | Global Median        | 1          | 0.84 |
| GSE25401   | GPL6244     | Homo Sapiens | Omental adipose          | 26     | Global Median        | 0.8        | 0.71 |
| GSE17913   | GPL570      | Homo Sapiens | Oral mucosa              | 40     | RMA                  | 0.9        | 0.68 |
| GSE37265   | GPL570      | Homo Sapiens | Oral mucosa              | 19     | RMA                  | 0.85       | 0.76 |
| GSE14407   | GPL570      | Homo Sapiens | Ovary surface epithelium | 12     | MAS 5                | 1.06       | 0.74 |
| GSE38666   | GPL570      | Homo Sapiens | Ovary surface epithelium | 12     | MAS 5                | 1.06       | 0.74 |
| GSE29220   | GPL570      | Homo Sapiens | Ovary surface epithelium | 11     | gcRMA                | 1.154      | 0.81 |
| GSE29450   | GPL570      | Homo Sapiens | Ovary surface epithelium | 10     | RMA                  | 1.09       | 0.81 |
| GSE26712   | GPL96       | Homo Sapiens | Ovary surface epithelium | 10     | RMA                  | 1.16       | 0.76 |
| GSE16515   | GPL570      | Homo Sapiens | Pancreatic tissue        | 16     | gcRMA                | 0.8        | 0.86 |
| GSE15471   | GPL570      | Homo Sapiens | Pancreatic tissue        | 39     | RMA                  | 1          | 0.82 |
| GSE28735   | GPL6244     | Homo sapiens | pancreatic tissue        | 45     | RMA                  | 1          | 0.79 |
| GSE27562   | GPL570      | Homo sapiens | PBMC                     | 46     | RMA                  | 0.93       | 0.71 |



Nehme et al: Atlas of Tissue Renin-Angiotensin-Aldosterone System (RAAS) in Human

| Dataset ID | Platform ID | Species      | Tissue                | Normal | algorithm        | Cut height | MAC  |
|------------|-------------|--------------|-----------------------|--------|------------------|------------|------|
| GSE11761   | GPL570      | Homo Sapiens | PBMC                  | 40     | gcRMA            | 1.05       | 0.79 |
| GSE14642   | GPL570      | Homo Sapiens | PBMC                  | 40     | gcRMA            | 0.93       | 0.78 |
| GSE15932   | GPL570      | Homo sapiens | PBMC                  | 32     | VSN              | 0.84       | 0.6  |
| GSE21942   | GPL570      | Homo Sapiens | PBMC                  | 15     | gcRMA            | 0.99       | 0.7  |
| GSE17114   | GPL570      | Homo sapiens | PBMC                  | 14     | RMA              | 0.875      | 0.73 |
| GSE43553   | GPL571      | Homo Sapiens | PBMC                  | 34     | Global scaling   | 0.9        | 0.79 |
| GSE41890   | GPL6244     | Homo Sapiens | PBMC                  | 24     | gcRMA            | 0.91       | 0.77 |
| GSE28686   | GPL6244     | Homo Sapiens | PBMC                  | 20     | gcRMA            | 0.78       | 0.82 |
| GSE12585   | GPL96       | Homo Sapiens | PBMC                  | 23     | RMA              | 1          | 0.74 |
| GSE14577   | GPL96       | Homo Sapiens | PBMC                  | 15     | RMA              | 1          | 0.75 |
| GSE25507   | GPL570      | Homo sapiens | Periheral lymphocytes | 64     | RMA              | 0.85       | 0.66 |
| GSE7638    | GPL571      | Homo sapiens | Peripheral monocytes  | 160    | NUSE             | 0.86       | 0.72 |
| GSE36895   | GPL570      | Homo Sapiens | Renal cortex          | 23     | RMA              | 1          | 0.72 |
| GSE20950   | GPL570      | Homo Sapiens | Subcutaneous adipose  | 12     | RMA              | 0.6        | 0.84 |
| GSE26339   | GPL570      | Homo Sapiens | Subcutaneous adipose  | 11     | Mas 5            | 1.1        | 0.83 |
| GSE27916   | GPL570      | Homo Sapiens | Subcutaneous adipose  | 255    | PLIER            | 0.93       | 0.72 |
| GSE27916   | GPL570      | Homo Sapiens | Subcutaneous adipose  | 120    | PLIER            | 0.94       | 0.69 |
| GSE27949   | GPL570      | Homo Sapiens | Subcutaneous adipose  | 11     | MAS5             | 1          | 0.82 |
| GSE28005   | GPL570      | Homo Sapiens | Subcutaneous adipose  | 13     | RMA              | 1          | 0.8  |
| GSE29718   | GPL6244     | Homo Sapiens | Subcutaneous adipose  | 15     | RMA              | 1          | 0.78 |
| GSE19811   | GPL96       | Homo Sapiens | Subcutaneous adipose  | 13     | RMA              | 1.1        | 0.81 |
| GSE35710   | GPL96       | Homo Sapiens | Subcutaneous adipose  | 24     | PLIER            | 1          | 0.78 |
| GSE18206   | GPL570      | Homo sapiens | Skin                  | 21     | VSN              | 1          | 0.74 |
| GSE30999   | GPL570      | Homo sapiens | Skin                  | 85     | gcRMA            | 1          | 0.77 |
| GSE34248   | GPL570      | Homo sapiens | Skin                  | 14     | Rosetta resolver | 0.92       | 0.76 |
| GSE36842   | GPL570      | Homo sapiens | Skin                  | 23     | fRMA             | 0.88       | 0.75 |
| GSE41662   | GPL570      | Homo sapiens | Skin                  | 24     | Rosetta resolver | 0.8        | 0.69 |
| GSE41663   | GPL570      | Homo sapiens | Skin                  | 15     | Rosetta resolver | 0.86       | 0.76 |
| GSE32407   | GPL571      | Homo sapiens | Skin                  | 40     | gcRMA            | 1.088      | 0.78 |

Nehme et al: Atlas of Tissue Renin-Angiotensin-Aldosterone System (RAAS) in Human

| Dataset ID | Platform ID | Species      | Tissue                  | Normal | algorithm      | Cut height | MAC  |
|------------|-------------|--------------|-------------------------|--------|----------------|------------|------|
| GSE11784   | GPL570      | Homo sapiens | small airway epithelium | 63     | MAS 5,0        | 0.93       | 0.72 |
| GSE22047   | GPL570      | Homo sapiens | small airway epithelium | 60     | Global scaling | 0.93       | 0.62 |
| GSE30063   | GPL570      | Homo sapiens | small airway epithelium | 60     | Global scaling | 0.93       | 0.62 |
| GSE19667   | GPL570      | Homo sapiens | small airway epithelium | 48     | MAS 5,0        | 0.84       | 0.58 |
| GSE19407   | GPL570      | Homo Sapiens | small airway epithelium | 47     | MAS 5          | 0.86       | 0.72 |
| GSE11906   | GPL570      | Homo Sapiens | small airway epithelium | 35     | RMA            | 1          | 0.74 |
| GSE13933   | GPL570      | Homo sapiens | small airway epithelium | 23     | MAS 5,0        | 1.05       | 0.66 |
| GSE27681   | GPL570      | Homo sapiens | small airway epithelium | 21     | Global scaling | 1          | 0.7  |
| GSE14924   | GPL570      | Homo Sapiens | T cells                 | 21     | MAS 5          | 1          | 0.62 |
| GSE29265   | GPL570      | Homo Sapiens | Thyroid                 | 20     | RMA            | 0.71       | 0.71 |
| GSE33630   | GPL570      | Homo Sapiens | Thyroid                 | 46     | RMA            | 0.69       | 0.69 |
| GSE13601   | GPL8300     | Homo Sapiens | Tongue                  | 27     | MAS 5          | 0.88       | 0.72 |
| GSE13070   | GPL570      | Homo Sapiens | Vastus lateralis        | 87     | MAS 5.0        | 0.82       | 0.65 |
| GSE13070   | GPL570      | Homo Sapiens | Vastus lateralis        | 53     | MAS 5.0        | 0.85       | 0.67 |
| GSE14901   | GPL570      | Homo Sapiens | Vastus lateralis        | 72     | MAS 5          | 1.04       | 0.61 |
| GSE17674   | GPL570      | Homo Sapiens | Vastus lateralis        | 18     | RMA            | 0.925      | 0.8  |
| GSE19420   | GPL570      | Homo sapiens | Vastus lateralis        | 24     | MAS 5,0        | 1          | 0.63 |
| GSE25462   | GPL570      | Homo sapiens | Vastus lateralis        | 50     | MAS 5,0        | 1          | 0.6  |
| GSE25941   | GPL570      | Homo Sapiens | Vastus lateralis        | 36     | Global scaling | 0.9        | 0.54 |
| GSE38718   | GPL570      | Homo Sapiens | Vastus lateralis        | 22     | RMA            | 1          | 0.73 |
| GSE41168   | GPL570      | Homo Sapiens | Vastus lateralis        | 47     | RMA            | 0.79       | 0.54 |
| GSE8157    | GPL570      | Homo sapiens | Vastus lateralis        | 43     | RMA            | 1.16       | 0.78 |
| GSE9419    | GPL570      | Homo Sapiens | Vastus lateralis        | 66     | MAS 5          | 0.803      | 0.52 |
| GSE11681   | GPL96       | Homo sapiens | Vastus lateralis        | 10     | RMA            | 1          | 0.78 |
| GSE11686   | GPL96       | Homo Sapiens | Vastus lateralis        | 16     | MAS5           | 1          | 0.68 |
| GSE17371   | GPL96       | Homo sapiens | Vastus lateralis        | 12     | MAS 5,0        | 0.9        | 0.72 |
| GSE13985   | GPL570      | Homo sapiens | WBC                     | 10     | RMA            | 0.82       | 0.8  |
| GSE28498   | GPL6244     | Homo Sapiens | WBC                     | 26     | RMA            | 0.6        | 0.82 |

### Supplementary Table S3: Tissue Expression Profiles of ExtRAAS Genes

**Supplementary Table S3: Tissue expression profiles of extRAAS genes.** Tissues are arranged according to the tissue dendrogram of figure 5 in the article (see dendrogram below). PBMC, peripheral blood mononuclear cells; small airways, small airways epithelium; large airways, large airways epithelium; SC adipose, sub-cutaneous adipose tissue.

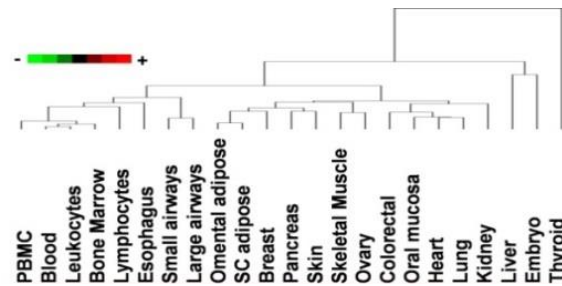

Nehme et al: Atlas of Tissue Renin-Angiotensin-Aldosterone System (RAAS) in Human

| Gene symbol | PBMC   | Blood  | Leukocytes | Bone Marrow | Lymphocytes | Esophagus | Small airways | Large airways |
|-------------|--------|--------|------------|-------------|-------------|-----------|---------------|---------------|
| ACE         | 31 ± 5 | 35 ± 4 | 36 ± 7     | 43 ± 6      | 37 ± 7      | 14 ± 3    | 50 ± 1        | 55 ± 0        |
| ACE2        | 20 ± 4 | 24 ± 4 | 19 ± 5     | 23 ± 5      | 40 ± 4      | 36 ± 11   | 54 ± 0        | 59 ± 0        |
| AGT         | 41 ± 3 | 47 ± 4 | 42 ± 9     | 39 ± 5      | 49 ± 4      | 43 ± 5    | 47 ± 0        | 51 ± 0        |
| AGTR1       | 24 ± 4 | 28 ± 5 | 25 ± 6     | 31 ± 4      | 42 ± 5      | 32 ± 13   | 33 ± 1        | 36 ± 1        |
| AGTR2       | 30 ± 4 | 26 ± 4 | 21 ± 7     | 20 ± 4      | 37 ± 3      | 21 ± 3    | 26 ± 1        | 35 ± 1        |
| AKR1C4      | 16 ± 4 | 17 ± 3 | 10 ± 2     | 11 ± 2      | 23 ± 5      | 13 ± 5    | 38 ± 1        | 44 ± 0        |
| AKR1D1      | 13 ± 4 | 11 ± 3 | 6 ± 3      | 6 ± 3       | 18 ± 5      | 8 ± 6     | 16 ± 1        | 15 ± 0        |
| ANPEP       | 86 ± 4 | 94 ± 1 | 96 ± 2     | 71 ± 7      | 57 ± 10     | 21 ± 6    | 84 ± 0        | 75 ± 0        |
| ATP6AP2     | 98 ± 1 | 97 ± 1 | 98 ± 1     | 94 ± 3      | 99 ± 1      | 95 ± 2    | 99 ± 0        | 99 ± 0        |
| CMA1        | 18 ± 2 | 23 ± 2 | 22 ± 3     | 22 ± 3      | 26 ± 3      | 26 ± 7    | 21 ± 1        | 13 ± 1        |
| CPA3        | 58 ± 5 | 67 ± 3 | 46 ± 12    | 76 ± 11     | 62 ± 5      | 72 ± 6    | 89 ± 0        | 82 ± 0        |
| CTSA        | 98 ± 1 | 96 ± 1 | 98 ± 1     | 87 ± 4      | 90 ± 4      | 91 ± 3    | 93 ± 0        | 92 ± 0        |
| CTSD        | 85 ± 3 | 82 ± 2 | 91 ± 4     | 71 ± 4      | 70 ± 6      | 78 ± 3    | 93 ± 0        | 93 ± 0        |
| CTSG        | 48 ± 3 | 53 ± 3 | 56 ± 10    | 87 ± 7      | 62 ± 4      | 57 ± 5    | 35 ± 1        | 30 ± 0        |
| CYP11A1     | 20 ± 3 | 29 ± 2 | 23 ± 4     | 25 ± 3      | 36 ± 6      | 39 ± 5    | 21 ± 2        | 11 ± 1        |
| CYP11B1     | 25 ± 6 | 32 ± 6 | 26 ± 13    | 26 ± 7      | 34 ± 7      | 22 ± 10   | 15 ± 1        | 14 ± 1        |
| CYP11B2     | 47 ± 6 | 45 ± 5 | 58 ± 10    | 47 ± 6      | 29 ± 13     | 39 ± 9    | 21 ± 2        | 27 ± 0        |
| CYP17A1     | 27 ± 4 | 36 ± 4 | 36 ± 7     | 33 ± 6      | 43 ± 2      | 40 ± 8    | 33 ± 1        | 32 ± 1        |
| CYP21A2     | 34 ± 5 | 37 ± 4 | 42 ± 5     | 37 ± 4      | 31 ± 9      | 30 ± 9    | 24 ± 1        | 21 ± 1        |
| DPP3        | 78 ± 3 | 74 ± 4 | 75 ± 3     | 72 ± 5      | 71 ± 9      | 56 ± 8    | 79 ± 1        | 82 ± 0        |
| EGFR        | 28 ± 7 | 43 ± 5 | 43 ± 7     | 51 ± 8      | 49 ± 9      | 62 ± 16   | 35 ± 1        | 33 ± 0        |
| ENPEP       | 15 ± 5 | 7 ± 3  | 8 ± 3      | 11 ± 3      | 3 ± 1       | 11 ± 6    | 4 ± 1         | 18 ± 1        |
| GPFR        | 41 ± 6 | 49 ± 4 | 56 ± 1     | 40 ± 7      | 34 ± 8      | 34 ± 7    | 21 ± 1        | 17 ± 0        |
| HSD11B1     | 34 ± 3 | 44 ± 3 | 34 ± 6     | 29 ± 5      | 50 ± 2      | 34 ± 8    | 41 ± 1        | 38 ± 1        |
| HSD11B2     | 23 ± 5 | 23 ± 4 | 31 ± 7     | 31 ± 7      | 16 ± 6      | 38 ± 3    | 32 ± 1        | 35 ± 1        |
| IGF2R       | 93 ± 2 | 96 ± 1 | 95 ± 3     | 72 ± 6      | 91 ± 5      | 84 ± 1    | 89 ± 0        | 89 ± 0        |
| KLK1        | 62 ± 3 | 64 ± 3 | 64 ± 6     | 58 ± 6      | 65 ± 3      | 57 ± 2    | 55 ± 1        | 47 ± 0        |
| LNPEP       | 66 ± 8 | 48 ± 5 | 53 ± 15    | 55 ± 10     | 56 ± 7      | 28 ± 2    | 49 ± 0        | 54 ± 0        |
| MAS1        | 21 ± 5 | 27 ± 4 | 19 ± 5     | 23 ± 5      | 35 ± 3      | 48 ± 8    | 22 ± 1        | 19 ± 1        |
| MME         | 66 ± 8 | 95 ± 3 | 88 ± 10    | 72 ± 9      | 43 ± 16     | 42 ± 14   | 45 ± 1        | 36 ± 1        |
| NR3C1       | 94 ± 2 | 94 ± 2 | 95 ± 2     | 89 ± 3      | 95 ± 1      | 82 ± 6    | 93 ± 0        | 93 ± 0        |
| NR3C2       | 71 ± 3 | 57 ± 4 | 50 ± 13    | 32 ± 6      | 80 ± 5      | 30 ± 10   | 85 ± 0        | 85 ± 0        |
| PREP        | 79 ± 2 | 79 ± 2 | 78 ± 2     | 74 ± 4      | 79 ± 5      | 75 ± 5    | 77 ± 0        | 79 ± 0        |
| REN         | 30 ± 5 | 33 ± 4 | 30 ± 5     | 36 ± 5      | 30 ± 4      | 33 ± 12   | 34 ± 1        | 25 ± 1        |
| RNPEP       | 91 ± 1 | 91 ± 2 | 94 ± 2     | 82 ± 5      | 87 ± 2      | 92 ± 1    | 96 ± 0        | 96 ± 0        |
| THOP1       | 55 ± 3 | 51 ± 4 | 55 ± 5     | 59 ± 7      | 58 ± 5      | 48 ± 7    | 68 ± 0        | 68 ± 0        |

Nehme et al: Atlas of Tissue Renin-Angiotensin-Aldosterone System (RAAS) in Human

| Gene symbol | Omental adipose | SC adipose | Breast  | Pancreas | Skin    | Skeletal Muscle | Ovary   | Colorectal |
|-------------|-----------------|------------|---------|----------|---------|-----------------|---------|------------|
| ACE         | 67 ± 1          | 68 ± 2     | 38 ± 12 | 58 ± 6   | 44 ± 5  | 50 ± 4          | 23 ± 5  | 61 ± 7     |
| ACE2        | 38 ± 1          | 35 ± 1     | 44 ± 3  | 56 ± 1   | 28 ± 4  | 36 ± 4          | 37 ± 8  | 84 ± 4     |
| AGT         | 51 ± 5          | 63 ± 1     | 58 ± 7  | 70 ± 8   | 60 ± 3  | 89 ± 1          | 60 ± 4  | 66 ± 4     |
| AGTR1       | 93 ± 1          | 94 ± 1     | 82 ± 5  | 63 ± 4   | 84 ± 5  | 80 ± 2          | 76 ± 5  | 51 ± 6     |
| AGTR2       | 18 ± 3          | 27 ± 1     | 31 ± 3  | 25 ± 5   | 20 ± 4  | 37 ± 3          | 36 ± 2  | 34 ± 3     |
| AKR1C4      | 49 ± 12         | 25 ± 3     | 22 ± 5  | 28 ± 8   | 18 ± 3  | 19 ± 2          | 20 ± 6  | 18 ± 4     |
| AKR1D1      | 9 ± 2           | 2 ± 0      | 23 ± 9  | 15 ± 6   | 14 ± 4  | 15 ± 3          | 13 ± 4  | 9 ± 4      |
| ANPEP       | 67 ± 2          | 70 ± 2     | 79 ± 3  | 99 ± 1   | 73 ± 6  | 33 ± 2          | 31 ± 5  | 96 ± 1     |
| ATP6AP2     | 96 ± 1          | 98 ± 0     | 98 ± 1  | 98 ± 1   | 98 ± 1  | 88 ± 1          | 100 ± 0 | 98 ± 2     |
| CMA1        | 51 ± 1          | 45 ± 2     | 45 ± 6  | 33 ± 4   | 60 ± 7  | 36 ± 2          | 28 ± 5  | 41 ± 5     |
| CPA3        | 75 ± 3          | 76 ± 1     | 65 ± 9  | 94 ± 2   | 78 ± 6  | 57 ± 2          | 34 ± 12 | 80 ± 5     |
| CTSA        | 95 ± 0          | 95 ± 0     | 85 ± 4  | 95 ± 2   | 94 ± 1  | 85 ± 2          | 79 ± 3  | 99 ± 1     |
| CTSD        | 89 ± 2          | 87 ± 1     | 74 ± 6  | 90 ± 5   | 83 ± 3  | 78 ± 2          | 53 ± 9  | 91 ± 2     |
| CTSG        | 65 ± 1          | 75 ± 1     | 57 ± 9  | 56 ± 7   | 70 ± 5  | 69 ± 2          | 52 ± 1  | 67 ± 3     |
| CYP11A1     | 37 ± 2          | 37 ± 1     | 38 ± 3  | 21 ± 10  | 20 ± 6  | 33 ± 2          | 37 ± 7  | 27 ± 4     |
| CYP11B1     | 33 ± 7          | 26 ± 2     | 31 ± 9  | 22 ± 11  | 14 ± 1  | 31 ± 4          | 30 ± 6  | 22 ± 7     |
| CYP11B2     | 46 ± 4          | 64 ± 1     | 37 ± 9  | 44 ± 15  | 16 ± 6  | 46 ± 6          | 28 ± 7  | 48 ± 7     |
| CYP17A1     | 36 ± 1          | 39 ± 1     | 31 ± 7  | 25 ± 12  | 14 ± 5  | 49 ± 3          | 33 ± 8  | 38 ± 4     |
| CYP21A2     | 44 ± 3          | 49 ± 1     | 38 ± 9  | 30 ± 11  | 74 ± 11 | 39 ± 4          | 50 ± 7  | 34 ± 7     |
| DPP3        | 72 ± 2          | 81 ± 1     | 66 ± 9  | 74 ± 8   | 72 ± 3  | 59 ± 3          | 70 ± 3  | 92 ± 2     |
| EGFR        | 67 ± 5          | 58 ± 3     | 75 ± 3  | 54 ± 21  | 44 ± 4  | 61 ± 4          | 86 ± 5  | 55 ± 9     |
| ENPEP       | 88 ± 1          | 66 ± 3     | 56 ± 8  | 72 ± 3   | 46 ± 6  | 57 ± 4          | 43 ± 9  | 37 ± 9     |
| GPFR        | 75 ± 2          | 83 ± 1     | 54 ± 12 | 44 ± 5   | 54 ± 5  | 48 ± 3          | 57 ± 4  | 63 ± 5     |
| HSD11B1     | 77 ± 5          | 91 ± 0     | 64 ± 8  | 61 ± 7   | 82 ± 2  | 61 ± 2          | 78 ± 2  | 46 ± 2     |
| HSD11B2     | 37 ± 0          | 31 ± 1     | 34 ± 4  | 45 ± 1   | 73 ± 4  | 34 ± 1          | 37 ± 5  | 98 ± 1     |
| IGF2R       | 93 ± 1          | 91 ± 1     | 81 ± 5  | 92 ± 2   | 87 ± 2  | 93 ± 1          | 77 ± 4  | 92 ± 3     |
| KLK1        | 57 ± 2          | 61 ± 1     | 58 ± 4  | 98 ± 1   | 83 ± 3  | 67 ± 2          | 69 ± 2  | 91 ± 2     |
| LNPEP       | 72 ± 7          | 29 ± 2     | 31 ± 9  | 59 ± 17  | 44 ± 4  | 46 ± 4          | 30 ± 7  | 43 ± 5     |
| MAS1        | 20 ± 3          | 37 ± 1     | 35 ± 7  | 16 ± 10  | 18 ± 4  | 45 ± 3          | 35 ± 8  | 45 ± 2     |
| MME         | 96 ± 1          | 95 ± 0     | 91 ± 3  | 62 ± 8   | 62 ± 4  | 79 ± 2          | 43 ± 11 | 50 ± 7     |
| NR3C1       | 97 ± 1          | 97 ± 1     | 94 ± 3  | 93 ± 2   | 96 ± 1  | 98 ± 0          | 97 ± 2  | 82 ± 7     |
| NR3C2       | 73 ± 3          | 71 ± 1     | 78 ± 3  | 83 ± 3   | 75 ± 2  | 87 ± 1          | 83 ± 8  | 95 ± 2     |
| PREP        | 74 ± 3          | 75 ± 1     | 74 ± 5  | 80 ± 3   | 79 ± 2  | 94 ± 0          | 76 ± 1  | 92 ± 2     |
| REN         | 24 ± 1          | 27 ± 1     | 25 ± 8  | 24 ± 10  | 24 ± 6  | 27 ± 3          | 29 ± 6  | 38 ± 4     |
| RNPEP       | 86 ± 1          | 85 ± 1     | 87 ± 2  | 93 ± 2   | 81 ± 3  | 83 ± 1          | 78 ± 5  | 96 ± 1     |
| THOP1       | 62 ± 2          | 53 ± 2     | 52 ± 5  | 59 ± 3   | 44 ± 8  | 64 ± 3          | 47 ± 4  | 75 ± 3     |

Nehme et al: Atlas of Tissue Renin-Angiotensin-Aldosterone System (RAAS) in Human

| Gene symbol | Oral Mucosa | Heart   | Lung    | Kidney  | Liver   | Embryo  | Thyroid |
|-------------|-------------|---------|---------|---------|---------|---------|---------|
| ACE         | 53 ± 3      | 57 ± 5  | 65 ± 11 | 56 ± 12 | 35 ± 11 | 32 ± 9  | 58 ± 5  |
| ACE2        | 50 ± 4      | 79 ± 2  | 36 ± 4  | 92 ± 3  | 48 ± 8  | 44 ± 15 | 40 ± 7  |
| AGT         | 51 ± 2      | 94 ± 4  | 51 ± 4  | 90 ± 4  | 100 ± 1 | 84 ± 4  | 66 ± 2  |
| AGTR1       | 38 ± 6      | 63 ± 4  | 71 ± 4  | 82 ± 8  | 98 ± 1  | 53 ± 7  | 98 ± 1  |
| AGTR2       | 24 ± 4      | 36 ± 8  | 60 ± 6  | 39 ± 5  | 28 ± 3  | 49 ± 5  | 50 ± 7  |
| AKR1C4      | 7 ± 2       | 11 ± 3  | 10 ± 2  | 19 ± 6  | 96 ± 2  | 23 ± 5  | 36 ± 4  |
| AKR1D1      | 3 ± 0       | 8 ± 3   | 5 ± 3   | 11 ± 6  | 97 ± 2  | 33 ± 8  | 91 ± 0  |
| ANPEP       | 69 ± 3      | 48 ± 4  | 65 ± 11 | 98 ± 1  | 98 ± 1  | 48 ± 9  | 58 ± 4  |
| ATP6AP2     | 99 ± 0      | 95 ± 1  | 97 ± 1  | 99 ± 1  | 96 ± 2  | 95 ± 1  | 82 ± 5  |
| CMA1        | 44 ± 4      | 41 ± 5  | 28 ± 5  | 26 ± 2  | 20 ± 3  | 16 ± 5  | 63 ± 4  |
| CPA3        | 84 ± 7      | 59 ± 8  | 96 ± 1  | 60 ± 1  | 49 ± 6  | 18 ± 5  | 60 ± 12 |
| CTSA        | 95 ± 1      | 94 ± 0  | 96 ± 1  | 99 ± 0  | 93 ± 2  | 78 ± 2  | 77 ± 11 |
| CTSD        | 83 ± 1      | 88 ± 4  | 96 ± 1  | 92 ± 1  | 91 ± 2  | 60 ± 2  | 89 ± 3  |
| CTSG        | 72 ± 2      | 64 ± 9  | 59 ± 6  | 59 ± 2  | 53 ± 11 | 43 ± 4  | 83 ± 2  |
| CYP11A1     | 55 ± 2      | 32 ± 3  | 31 ± 5  | 21 ± 4  | 45 ± 8  | 39 ± 6  | 26 ± 6  |
| CYP11B1     | 7 ± 1       | 20 ± 9  | 22 ± 7  | 27 ± 9  | 20 ± 12 | 17 ± 4  | 65 ± 0  |
| CYP11B2     | 57 ± 4      | 57 ± 10 | 48 ± 4  | 34 ± 13 | 54 ± 7  | 39 ± 6  | 41 ± 12 |
| CYP17A1     | 37 ± 3      | 47 ± 9  | 36 ± 4  | 85 ± 4  | 53 ± 6  | 41 ± 1  | 79 ± 7  |
| CYP21A2     | 45 ± 4      | 47 ± 4  | 40 ± 4  | 32 ± 8  | 61 ± 9  | 33 ± 5  | 6 ± 0   |
| DPP3        | 86 ± 2      | 74 ± 3  | 75 ± 5  | 77 ± 5  | 74 ± 5  | 66 ± 5  | 4 ± 1   |
| EGFR        | 69 ± 3      | 54 ± 9  | 63 ± 7  | 70 ± 11 | 68 ± 7  | 47 ± 9  | 45 ± 6  |
| ENPEP       | 43 ± 9      | 69 ± 4  | 49 ± 9  | 97 ± 1  | 93 ± 2  | 30 ± 8  | 92 ± 4  |
| GPFR        | 57 ± 2      | 56 ± 2  | 61 ± 4  | 63 ± 9  | 73 ± 9  | 35 ± 5  | 56 ± 3  |
| HSD11B1     | 44 ± 6      | 59 ± 10 | 70 ± 7  | 54 ± 9  | 99 ± 1  | 36 ± 6  | 56 ± 6  |
| HSD11B2     | 49 ± 3      | 35 ± 7  | 40 ± 3  | 98 ± 0  | 36 ± 5  | 36 ± 2  | 83 ± 2  |
| IGF2R       | 94 ± 1      | 93 ± 1  | 90 ± 2  | 92 ± 4  | 94 ± 1  | 83 ± 3  | 100 ± 0 |
| KLK1        | 66 ± 3      | 68 ± 6  | 55 ± 5  | 84 ± 2  | 56 ± 7  | 54 ± 5  | 30 ± 3  |
| LNPEP       | 40 ± 3      | 72 ± 8  | 47 ± 13 | 31 ± 7  | 29 ± 8  | 44 ± 8  | 49 ± 9  |
| MAS1        | 31 ± 2      | 32 ± 8  | 33 ± 9  | 38 ± 4  | 42 ± 3  | 37 ± 6  | 25 ± 2  |
| MME         | 66 ± 3      | 64 ± 7  | 89 ± 2  | 97 ± 1  | 71 ± 7  | 68 ± 3  | 93 ± 1  |
| NR3C1       | 94 ± 1      | 92 ± 4  | 91 ± 2  | 90 ± 5  | 92 ± 3  | 45 ± 13 | 63 ± 2  |
| NR3C2       | 48 ± 7      | 86 ± 3  | 73 ± 5  | 88 ± 3  | 69 ± 9  | 42 ± 12 | 36 ± 3  |
| PREP        | 86 ± 1      | 82 ± 2  | 77 ± 3  | 74 ± 5  | 77 ± 7  | 88 ± 1  | 29 ± 8  |
| REN         | 48 ± 4      | 33 ± 7  | 44 ± 4  | 79 ± 7  | 37 ± 3  | 28 ± 7  | 41 ± 8  |
| RNPEP       | 95 ± 1      | 85 ± 1  | 91 ± 2  | 86 ± 5  | 87 ± 2  | 87 ± 0  | 48 ± 4  |
| THOP1       | 71 ± 2      | 67 ± 3  | 51 ± 9  | 48 ± 11 | 69 ± 7  | 67 ± 2  | 12 ± 1  |

## Supplementary Table S4: ExtRAAS Co-expression Modules in All 23 Studied Tissues

**Supplementary Table S4: ExtRAAS co-expression modules in all 23 studied tissue.** Below each tissue the number of datasets and corresponding samples are represented as (datasets, samples). At the top of each module the average coordination rate is expressed in percentage (average percentage of genes within a module that are always coordinated across the different datasets of a specific tissue). Next to each gene symbol the abundance of the mRNA is expressed in mean MCR (Mean expression centile rank). Genes corresponding to core groups are colored; CTSA and CTSD in red; MR, GR and AGTR1 in blue; and CTSG, CPA3 and CMA1 in green. Tissues are arranged based on the tissue dendrogram of figure 5 in the article (see dendrogram below).

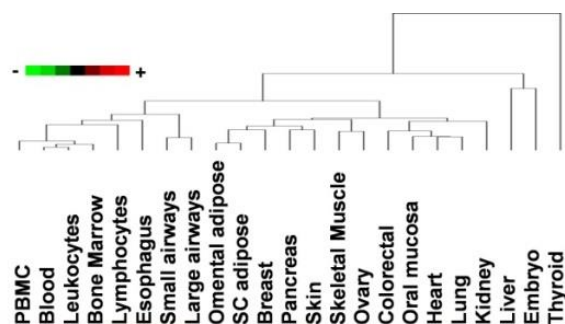

Nehme et al: Atlas of Tissue Renin-Angiotensin-Aldosterone System (RAAS) in Human

| Tissues (datasets, samples) | Module 1                                                                              | Module 2                                                                           | Module 3                                              | Module 4                                              | Module 5                                                 | Module 6                                                | Module 7                    | Module 8                               | Non-clustered genes                                                                              |                                                               |
|-----------------------------|---------------------------------------------------------------------------------------|------------------------------------------------------------------------------------|-------------------------------------------------------|-------------------------------------------------------|----------------------------------------------------------|---------------------------------------------------------|-----------------------------|----------------------------------------|--------------------------------------------------------------------------------------------------|---------------------------------------------------------------|
| <b>Thyroid (2, 66)</b>      | 100%                                                                                  | 100%                                                                               | 100%                                                  | 100%                                                  | 100%                                                     | 100%                                                    | 100%                        | 100%                                   |                                                                                                  |                                                               |
|                             | CTSD<br>CYP17A1<br>RNPEP                                                              | 89 ATP6AP2<br>79 GR<br>48 GPER<br>ACE2                                             | 82 MME<br>63 CTSG<br>56 CMA1<br>40 CPA3<br>HSD11B1    | 93 CYP11B2<br>41 KLK1<br>83<br>63<br>60<br>56         | 41 AGTR1<br>30 ENPEP<br>HSD11B2<br>ACE                   | 98 AKR1D1<br>92 CYP11B1<br>83 AKR1C4<br>58              | 91 PREP<br>65 THOP1<br>36   | 29 LNPEP<br>12 REN                     | 49 IGF2R<br>41 CTSA<br>AGT<br>ANPEP<br>AGTR2<br>EGFR<br>MR<br>CYP11A1<br>MAS1<br>CYP21A2<br>DPP3 | 100<br>77<br>66<br>58<br>50<br>45<br>36<br>26<br>25<br>6<br>4 |
| <b>Embryo (4, 66)</b>       | 83%                                                                                   | 80%                                                                                | 83%                                                   | 87%                                                   | 87%                                                      | 80%                                                     |                             |                                        |                                                                                                  |                                                               |
|                             | ATP6AP2<br>RNPEP<br>THOP1<br>DPP3                                                     | 95 AGTR2<br>87 LNPEP<br>67 MR<br>66 GPER<br>CYP21A2                                | 49 CTSG<br>44 CYP17A1<br>42 MAS1<br>35 CYP11B1<br>33  | 43 ANPEP<br>41 GR<br>37 CYP11A1<br>17 ENPEP<br>REN    | 48 PREP<br>45 KLK1<br>39 CYP11B2<br>30 HSD11B1<br>28 ACE | 88 AGT<br>54 AGTR1<br>39 AKR1D1<br>36 AKR1C4<br>32 CPA3 | 84<br>53<br>33<br>23<br>18  |                                        | IGF2R<br>CTSA<br>MME<br>CTSD<br>EGFR<br>ACE2<br>HSD11B2<br>CMA1                                  | 83<br>78<br>68<br>60<br>47<br>44<br>36<br>16                  |
| <b>Liver (5, 93)</b>        | 83%                                                                                   | 60%                                                                                | 87%                                                   | 80%                                                   | 80%                                                      | 74%                                                     | 74%                         | 67%                                    |                                                                                                  |                                                               |
|                             | ATP6AP2<br>IGF2R<br>CTSA<br>CTSD<br>DPP3<br>CYP21A2<br>ACE                            | 96 AGTR1<br>94 GR                                                                  | 98 HSD11B1<br>92 AKR1D1<br>AKR1C4                     | 99 EGFR<br>97 REN<br>96 CYP11B1                       | 68 ANPEP<br>37 KLK1<br>20 HSD11B2                        | 98 MAS1<br>56 LNPEP<br>36 AGTR2                         | 42 ENPEP<br>29 MME<br>28 MR | 93 CYP11B2<br>71 CYP17A1<br>69 CYP11A1 | 54 AGT<br>53 RNPEP<br>45 PREP<br>GPER<br>THOP1<br>CTSG<br>CPA3<br>ACE2<br>CMA1                   | 100<br>87<br>77<br>73<br>69<br>53<br>49<br>48<br>20           |
| <b>Kidney (4, 84)</b>       | 84%                                                                                   | 88%                                                                                | 85%                                                   | 94%                                                   | 80%                                                      |                                                         |                             |                                        |                                                                                                  |                                                               |
|                             | CTSA<br>ANPEP<br>ENPEP<br>MME<br>ACE2<br>CTSD<br>AGT<br>CYP17A1<br>KLK1<br>REN<br>ACE | 99 ATP6AP2<br>98 GR<br>97 MR<br>97 AGTR1<br>92<br>92<br>90<br>85<br>84<br>75<br>56 | 99 CTSG<br>90 AGTR2<br>88 MAS1<br>82 AKR1C4<br>AKR1D1 | 59 THOP1<br>39 CYP11B2<br>38 CYP21A2<br>19 CMA1<br>11 | 48 PREP<br>34 CPA3<br>32 HSD11B1<br>26 LNPEP<br>CYP11A1  | 74<br>60<br>54<br>31<br>21                              |                             |                                        | HSD11B2<br>IGF2R<br>RNPEP<br>DPP3<br>EGFR<br>GPER<br>CYP11B1                                     | 98<br>92<br>86<br>77<br>70<br>63<br>27                        |



Nehme et al: Atlas of Tissue Renin-Angiotensin-Aldosterone System (RAAS) in Human

|                                     |         |       |         |       |         |    |         |    |         |    |         |     |         |    |        |         |         |    |
|-------------------------------------|---------|-------|---------|-------|---------|----|---------|----|---------|----|---------|-----|---------|----|--------|---------|---------|----|
| <b>Lung</b><br>(5, 210)             | 90%     |       | 85%     |       | 100%    |    | 80%     |    | 86%     |    | 93%     |     | 80%     |    | 100%   |         |         |    |
|                                     | CTSD    | 96    | CPA3    | 96    | CTSG    | 59 | KLK1    | 55 | EGFR    | 63 | ATP6AP2 | 97  | CYP11B2 | 48 | AKR1C4 | 10      | ACE     | 65 |
|                                     | CTSA    | 96    | GR      | 91    | CMA1    | 28 | HSD11B2 | 40 | REN     | 44 | IGF2R   | 90  | CYP21A2 | 40 | AKR1D1 | 5       | GPER    | 61 |
|                                     | RNPEP   | 91    | MME     | 89    |         |    | CYP11A1 | 31 | MAS1    | 33 | PREP    | 77  |         |    |        |         | AGTR2   | 60 |
|                                     | DPP3    | 75    | MR      | 73    |         |    | CYP11B1 | 22 |         |    |         |     |         |    |        |         | AGT     | 51 |
|                                     | ANPEP   | 65    | AGTR1   | 71    |         |    |         |    |         |    |         |     |         |    |        |         | THOP1   | 51 |
|                                     | LNPEP   | 47    | HSD11B1 | 70    |         |    |         |    |         |    |         |     |         |    |        |         | ACE2    | 36 |
|                                     |         | ENPEP | 49      |       |         |    |         |    |         |    |         |     |         |    |        | CYP17A1 | 36      |    |
| <b>Heart</b><br>(4, 140)            | 77%     |       | 75%     |       | 80%     |    | 100%    |    | 81%     |    | 81%     |     | 75%     |    |        |         |         |    |
|                                     | CTSA    | 94    | GR      | 92    | CTSG    | 64 | EGFR    | 54 | KLK1    | 68 | IGF2R   | 93  | ACE2    | 79 |        |         | ATP6AP2 | 95 |
|                                     | AGT     | 94    | ENPEP   | 69    | AGTR1   | 63 | REN     | 33 | CMA1    | 41 | MME     | 64  | LNPEP   | 72 |        |         | MR      | 86 |
|                                     | CTSD    | 88    |         |       | CPA3    | 59 | MAS1    | 32 | HSD11B2 | 35 | HSD11B1 | 59  |         |    |        |         | RNPEP   | 85 |
|                                     | DPP3    | 74    |         |       | ACE     | 57 |         |    | CYP11B1 | 20 | AKR1D1  | 8   |         |    |        |         | PREP    | 82 |
|                                     | THOP1   | 67    |         |       | AKR1C4  | 11 |         |    |         |    |         |     |         |    |        |         | CYP11B2 | 57 |
|                                     |         |       |         |       |         |    |         |    |         |    |         |     |         |    |        |         | GPER    | 56 |
|                                     |         |       |         |       |         |    |         |    |         |    |         |     |         |    |        | ANPEP   | 48      |    |
|                                     |         |       |         |       |         |    |         |    |         |    |         |     |         |    |        | CYP21A2 | 47      |    |
|                                     |         |       |         |       |         |    |         |    |         |    |         |     |         |    |        | CYP17A1 | 47      |    |
|                                     |         |       |         |       |         |    |         |    |         |    |         |     |         |    |        | AGTR2   | 36      |    |
|                                     |         |       |         |       |         |    |         |    |         |    |         |     |         |    |        | CYP11A1 | 32      |    |
| <b>Oral mucosa</b><br>(4, 193)      | 81%     |       | 71%     |       | 96%     |    | 75%     |    | 87%     |    | 75%     |     | 75%     |    | 83%    |         |         |    |
|                                     | CTSA    | 95    | GR      | 94    | CPA3    | 84 | REN     | 48 | RNPEP   | 95 | KLK1    | 66  | ACE2    | 50 | AGT    | 69      | ATP6AP2 | 99 |
|                                     | DPP3    | 86    | MR      | 48    | CTSG    | 72 | MAS1    | 31 | IGF2R   | 94 | HSD11B2 | 49  | LNPEP   | 40 | AKR1C4 | 51      | CYP11B2 | 57 |
|                                     | THOP1   | 71    |         |       | ANPEP   | 69 | AGTR2   | 24 | PREP    | 86 |         |     |         |    | EGFR   | 7       | GPER    | 57 |
|                                     | CYP11A1 | 55    |         |       | MME     | 66 | CYP11B1 | 7  | CTSD    | 83 |         |     |         |    |        |         | ACE     | 53 |
|                                     |         |       |         |       | HSD11B1 | 44 | AKR1D1  | 3  |         |    |         |     |         |    |        |         | CYP21A2 | 45 |
|                                     |         |       |         |       | CMA1    | 44 |         |    |         |    |         |     |         |    |        |         | AGTR1   | 38 |
|                                     |         |       |         | ENPEP | 43      |    |         |    |         |    |         |     |         |    |        | CYP17A1 | 37      |    |
| <b>Colorectal</b><br>(8, 171)       | 82%     |       | 78%     |       | 96%     |    | 80%     |    | 83%     |    | 75%     |     | 75%     |    | 62%    |         |         |    |
|                                     | CTSA    | 98    | ATP6AP2 | 98    | CPA3    | 80 | RNPEP   | 96 | ANPEP   | 96 | AGT     | 66  | EGFR    | 55 | ACE    | 61      | LNPEP   | 43 |
|                                     | HSD11B2 | 98    | GR      | 82    | CTSG    | 66 | PREP    | 92 | ACE2    | 84 | CYP11B2 | 48  | CYP17A1 | 37 | MME    | 50      | REN     | 37 |
|                                     | MR      | 95    | GPER    | 63    | CMA1    | 41 | DPP3    | 91 | MAS1    | 44 | AGTR2   | 34  |         |    |        |         | ENPEP   | 36 |
|                                     | IGF2R   | 91    | AGTR1   | 50    |         |    | KLK1    | 91 | AKR1C4  | 18 | CYP21A2 | 34  |         |    |        |         | CYP11A1 | 26 |
|                                     | CTSD    | 91    | HSD11B1 | 45    |         |    | THOP1   | 74 | AKR1D1  | 9  | CYP11B1 | 21  |         |    |        |         |         |    |
|                                     |         |       |         |       |         |    |         |    |         |    |         |     |         |    |        |         |         |    |
| <b>Ovary Epithelium</b><br>(5, 55)  | 85%     |       | 80%     |       | 80%     |    | 88%     |    | 90%     |    | 84%     |     | 85%     |    | 85%    |         |         |    |
|                                     | CTSA    | 79    | GR      | 97    | EGFR    | 86 | CTSG    | 52 | THOP1   | 47 | ATP6AP2 | 100 | KLK1    | 69 | AGT    | 60      | RNPEP   | 78 |
|                                     | IGF2R   | 77    | MR      | 83    | CYP17A1 | 33 | ACE2    | 37 | MME     | 43 | HSD11B1 | 78  | CYP21A2 | 50 | CTSD   | 53      | PREP    | 76 |
|                                     | DPP3    | 70    | CYP11B1 | 30    | REN     | 29 | MAS1    | 35 | HSD11B2 | 37 | AGTR1   | 76  | CYP11B2 | 28 | AGTR2  | 36      | LNPEP   | 30 |
|                                     | GPER    | 57    |         |       | CMA1    | 28 | AKR1C4  | 20 | CYP11A1 | 37 | ENPEP   | 43  | ACE     | 23 | ANPEP  | 31      |         |    |
|                                     |         |       |         |       |         |    | AKR1D1  | 13 |         |    | CPA3    | 34  |         |    |        |         |         |    |
|                                     |         |       |         |       |         |    |         |    |         |    |         |     |         |    |        |         |         |    |
| <b>Skeletal Muscle</b><br>(14, 556) | 64%     |       | 76%     |       | 57%     |    | 74%     |    | 67%     |    | 57%     |     |         |    |        |         |         |    |
|                                     | CTSA    | 85    | GR      | 98    | CPA3    | 57 | KLK1    | 67 | CYP11B2 | 46 | ATP6AP2 | 88  |         |    |        |         | PREP    | 94 |
|                                     | RNPEP   | 83    | IGF2R   | 93    | CMA1    | 36 | CYP17A1 | 49 | CYP21A2 | 39 | AGTR1   | 80  |         |    |        |         | AGT     | 89 |
|                                     | CTSD    | 78    | MR      | 87    |         |    | REN     | 27 | AKR1C4  | 19 |         |     |         |    |        |         | MME     | 79 |
|                                     |         |       |         |       |         |    |         |    |         |    |         |     |         |    |        |         | CTSG    | 69 |
|                                     |         |       |         |       |         |    |         |    |         |    |         |     |         |    |        |         | THOP1   | 64 |
|                                     |         |       |         |       |         |    |         |    |         |    |         |     |         |    |        |         | HSD11B1 | 61 |
|                                     |         |       |         |       |         |    |         |    |         |    |         |     |         |    |        | EGFR    | 61      |    |
|                                     |         |       |         |       |         |    |         |    |         |    |         |     |         |    |        | DPP3    | 59      |    |
|                                     |         |       |         |       |         |    |         |    |         |    |         |     |         |    |        | ENPEP   | 57      |    |

Nehme et al: Atlas of Tissue Renin-Angiotensin-Aldosterone System (RAAS) in Human

|                                           |         |    |       |    |      |    |         |    |         |    |         |    |         |    |       |    |  |         |    |
|-------------------------------------------|---------|----|-------|----|------|----|---------|----|---------|----|---------|----|---------|----|-------|----|--|---------|----|
|                                           |         |    |       |    |      |    |         |    |         |    |         |    |         |    |       |    |  | ACE     | 50 |
|                                           |         |    |       |    |      |    |         |    |         |    |         |    |         |    |       |    |  | GPER    | 48 |
|                                           |         |    |       |    |      |    |         |    |         |    |         |    |         |    |       |    |  | LNPEP   | 46 |
|                                           |         |    |       |    |      |    |         |    |         |    |         |    |         |    |       |    |  | MAS1    | 45 |
|                                           |         |    |       |    |      |    |         |    |         |    |         |    |         |    |       |    |  | AGTR2   | 37 |
|                                           |         |    |       |    |      |    |         |    |         |    |         |    |         |    |       |    |  | ACE2    | 36 |
|                                           |         |    |       |    |      |    |         |    |         |    |         |    |         |    |       |    |  | HSD11B2 | 34 |
|                                           |         |    |       |    |      |    |         |    |         |    |         |    |         |    |       |    |  | CYP11A1 | 33 |
|                                           |         |    |       |    |      |    |         |    |         |    |         |    |         |    |       |    |  | ANPEP   | 33 |
|                                           |         |    |       |    |      |    |         |    |         |    |         |    |         |    |       |    |  | CYP11B1 | 31 |
|                                           |         |    |       |    |      |    |         |    |         |    |         |    |         |    |       |    |  | AKR1D1  | 15 |
| <b>Skin<br/>(7, 222)</b>                  | 81%     |    | 57%   |    | 90%  |    | 71%     |    | 57%     |    | 71%     |    |         |    |       |    |  |         |    |
|                                           | GPER    | 54 | AGTR1 | 84 | CPA3 | 78 | THOP1   | 44 | GR      | 96 | ATP6AP2 | 98 |         |    |       |    |  | CTSA    | 94 |
|                                           | ACE     | 44 | MR    | 75 | CTSG | 70 | REN     | 24 | HSD11B2 | 73 | ACE2    | 28 |         |    |       |    |  | IGF2R   | 87 |
|                                           | CYP11B2 | 16 |       |    | CMA1 | 60 |         |    |         |    |         |    |         |    |       |    |  | CTSD    | 83 |
|                                           |         |    |       |    |      |    |         |    |         |    |         |    |         |    |       |    |  | KLK1    | 83 |
|                                           |         |    |       |    |      |    |         |    |         |    |         |    |         |    |       |    |  | HSD11B1 | 82 |
|                                           |         |    |       |    |      |    |         |    |         |    |         |    |         |    |       |    |  | RNPEP   | 81 |
|                                           |         |    |       |    |      |    |         |    |         |    |         |    |         |    |       |    |  | PREP    | 79 |
|                                           |         |    |       |    |      |    |         |    |         |    |         |    |         |    |       |    |  | CYP21A2 | 74 |
|                                           |         |    |       |    |      |    |         |    |         |    |         |    |         |    |       |    |  | ANPEP   | 73 |
|                                           |         |    |       |    |      |    |         |    |         |    |         |    |         |    |       |    |  | DPP3    | 72 |
|                                           |         |    |       |    |      |    |         |    |         |    |         |    |         |    |       |    |  | MME     | 62 |
|                                           |         |    |       |    |      |    |         |    |         |    |         |    |         |    |       |    |  | AGT     | 60 |
|                                           |         |    |       |    |      |    |         |    |         |    |         |    |         |    |       |    |  | ENPEP   | 46 |
|                                           |         |    |       |    |      |    |         |    |         |    |         |    |         |    |       |    |  | EGFR    | 44 |
|                                           |         |    |       |    |      |    |         |    |         |    |         |    |         |    |       |    |  | LNPEP   | 44 |
|                                           |         |    |       |    |      |    |         |    |         |    |         |    |         |    |       |    |  | CYP11A1 | 20 |
|                                           |         |    |       |    |      |    |         |    |         |    |         |    |         |    |       |    |  | AGTR2   | 20 |
|                                           |         |    |       |    |      |    |         |    |         |    |         |    |         |    |       |    |  | MAS1    | 18 |
|                                           |         |    |       |    |      |    |         |    |         |    |         |    |         |    |       |    |  | AKR1C4  | 18 |
|                                           |         |    |       |    |      |    |         |    |         |    |         |    |         |    |       |    |  | AKR1D1  | 14 |
|                                           |         |    |       |    |      |    |         |    |         |    |         |    |         |    |       |    |  | CYP11B1 | 14 |
|                                           |         |    |       |    |      |    |         |    |         |    |         |    |         |    |       |    |  | CYP17A1 | 14 |
| <b>Pancreas<br/>(3, 100)</b>              | 100%    |    | 100%  |    | 100% |    | 100%    |    | 100%    |    | 100%    |    |         |    |       |    |  |         |    |
|                                           | ATP6AP2 | 98 | DPP3  | 74 | CPA3 | 94 | RNPEP   | 93 | CYP11B2 | 44 | ANPEP   | 99 |         |    |       |    |  | MR      | 83 |
|                                           | CTSA    | 95 | THOP1 | 59 | CTSG | 56 | PREP    | 80 | CYP21A2 | 30 | KLK1    | 98 |         |    |       |    |  | AGT     | 70 |
|                                           | GR      | 93 |       |    | CMA1 | 33 | ACE     | 58 | AGTR2   | 25 | MAS1    | 16 |         |    |       |    |  | AGTR1   | 63 |
|                                           | IGF2R   | 92 |       |    |      |    | ACE2    | 56 | CYP17A1 | 25 |         |    |         |    |       |    |  | MME     | 62 |
|                                           | CTSD    | 90 |       |    |      |    | HSD11B2 | 45 | REN     | 24 |         |    |         |    |       |    |  | EGFR    | 54 |
|                                           | ENPEP   | 72 |       |    |      |    |         |    | CYP11B1 | 22 |         |    |         |    |       |    |  | GPER    | 44 |
|                                           | HSD11B1 | 61 |       |    |      |    |         |    | AKR1D1  | 15 |         |    |         |    |       |    |  | AKR1C4  | 28 |
|                                           | LNPEP   | 59 |       |    |      |    |         |    |         |    |         |    |         |    |       |    |  | CYP11A1 | 21 |
| <b>Sub-cutaneous adipose<br/>(9, 474)</b> | 81%     |    | 88%   |    | 96%  |    | 78%     |    | 85%     |    | 75%     |    | 78%     |    | 79%   |    |  |         |    |
|                                           | CTSA    | 95 | GR    | 97 | CPA3 | 76 | ATP6AP2 | 98 | CYP11B2 | 64 | ACE     | 68 | CYP17A1 | 39 | MME   | 95 |  | HSD11B1 | 91 |
|                                           | IGF2R   | 91 | AGTR1 | 94 | CTSG | 75 | GPER    | 83 | KLK1    | 61 | THOP1   | 53 | MAS1    | 37 | AGT   | 63 |  | EGFR    | 58 |
|                                           | CTSD    | 87 | MR    | 71 | CMA1 | 45 | DPP3    | 81 | CYP21A2 | 49 | AKR1C4  | 25 | REN     | 27 | LNPEP | 29 |  | ACE2    | 35 |
|                                           | RNPEP   | 85 | ENPEP | 66 |      |    | ANPEP   | 70 | HSD11B2 | 31 |         |    | CYP11B1 | 26 |       |    |  |         |    |
|                                           | PREP    | 75 |       |    |      |    |         |    | AGTR2   | 27 |         |    |         |    |       |    |  |         |    |
|                                           | CYP11A1 | 37 |       |    |      |    |         |    | AKR1D1  | 2  |         |    |         |    |       |    |  |         |    |

Nehme et al: Atlas of Tissue Renin-Angiotensin-Aldosterone System (RAAS) in Human

|                                    |         |    |         |    |         |    |         |    |         |    |         |    |         |    |         |       |         |    |  |  |
|------------------------------------|---------|----|---------|----|---------|----|---------|----|---------|----|---------|----|---------|----|---------|-------|---------|----|--|--|
| <b>Omental adipose<br/>(4, 86)</b> | 91%     |    | 83%     |    | 83%     |    | 85%     |    | 75%     |    |         |    |         |    |         |       |         |    |  |  |
|                                    | ATP6AP2 | 96 | GR      | 97 | ACE     | 67 | AGT     | 51 | PREP    | 74 |         |    |         |    |         |       |         |    |  |  |
|                                    | CTSA    | 95 | MME     | 96 | KLK1    | 57 | ACE2    | 38 | LNPEP   | 72 |         |    |         |    |         |       |         |    |  |  |
|                                    | CTSD    | 89 | AGTR1   | 93 | CYP11B2 | 46 | REN     | 24 |         |    |         |    |         |    |         |       |         |    |  |  |
|                                    | RNPEP   | 86 | IGF2R   | 93 | CYP21A2 | 44 | MAS1    | 20 |         |    |         |    |         |    |         |       |         |    |  |  |
|                                    | HSD11B1 | 77 | ENPEP   | 88 | CYP11A1 | 37 | AKR1D1  | 9  |         |    |         |    |         |    |         |       |         |    |  |  |
|                                    | CPA3    | 75 | GPER    | 75 | HSD11B2 | 37 |         |    |         |    |         |    |         |    |         |       |         |    |  |  |
|                                    | DPP3    | 72 | MR      | 73 | CYP17A1 | 36 |         |    |         |    |         |    |         |    |         |       |         |    |  |  |
|                                    | CTSG    | 65 | ANPEP   | 67 | CYP11B1 | 33 |         |    |         |    |         |    |         |    |         |       |         |    |  |  |
|                                    | THOP1   | 62 | EGFR    | 67 | AGTR2   | 18 |         |    |         |    |         |    |         |    |         |       |         |    |  |  |
| CMA1                               | 51      |    |         |    |         |    |         |    |         |    |         |    |         |    |         |       |         |    |  |  |
| AKR1C4                             | 49      |    |         |    |         |    |         |    |         |    |         |    |         |    |         |       |         |    |  |  |
| <b>Breast<br/>(6, 239)</b>         | 86%     |    | 83%     |    | 73%     |    | 84%     |    | 83%     |    | 75%     |    | 83%     |    |         |       |         |    |  |  |
|                                    | RNPEP   | 86 | ATP6AP2 | 98 | CPA3    | 65 | EGFR    | 75 | ACE2    | 43 | AGT     | 57 | ANPEP   | 79 |         |       | MME     | 90 |  |  |
|                                    | CTSA    | 85 | GR      | 94 | CTSG    | 57 | MAS1    | 35 | REN     | 25 | ACE     | 38 | HSD11B2 | 34 |         |       | HSD11B1 | 63 |  |  |
|                                    | CTSD    | 74 | AGTR1   | 82 | CMA1    | 45 | AGTR2   | 31 |         |    | CYP11A1 | 38 |         |    |         |       | KLK1    | 57 |  |  |
|                                    | PREP    | 73 | IGF2R   | 81 |         |    |         |    |         |    | CYP11B1 | 31 |         |    |         |       | GPER    | 54 |  |  |
|                                    | DPP3    | 66 | MR      | 78 |         |    |         |    |         |    |         |    |         |    |         |       | CYP21A2 | 38 |  |  |
|                                    | THOP1   | 52 | ENPEP   | 55 |         |    |         |    |         |    |         |    |         |    |         |       | CYP11B2 | 36 |  |  |
|                                    |         |    |         |    |         |    |         |    |         |    |         |    |         |    |         |       | CYP17A1 | 31 |  |  |
|                                    |         |    |         |    |         |    |         |    |         |    |         |    |         |    |         |       | LNPEP   | 30 |  |  |
|                                    |         |    |         |    |         |    |         |    |         |    |         |    |         |    |         |       | AKR1D1  | 23 |  |  |
| <b>Large airways<br/>(5, 101)</b>  | 96%     |    | 93%     |    | 100%    |    | 96%     |    | 95%     |    | 93%     |    | 73%     |    | 80%     |       |         |    |  |  |
|                                    | RNPEP   | 96 | ATP6AP2 | 99 | CPA3    | 82 | ANPEP   | 75 | EGFR    | 33 | HSD11B1 | 38 | IGF2R   | 89 | CYP17A1 | 32    | AGT     | 51 |  |  |
|                                    | CTSD    | 93 | GR      | 93 | AKR1C4  | 44 | ACE     | 55 | REN     | 25 | HSD11B2 | 35 | DPP3    | 82 | CMA1    | 13    | KLK1    | 47 |  |  |
|                                    | CTSA    | 92 | MR      | 85 | CTSG    | 30 | MME     | 36 | MAS1    | 19 | CYP21A2 | 21 | AKR1D1  | 15 |         |       | CYP11B1 | 14 |  |  |
|                                    | PREP    | 79 | ACE2    | 59 | CYP11A1 | 11 | AGTR1   | 36 | ENPEP   | 18 |         |    |         |    |         |       |         |    |  |  |
|                                    | THOP1   | 68 | LNPEP   | 54 |         |    | CYP11B2 | 27 |         |    |         |    |         |    |         |       |         |    |  |  |
|                                    |         |    | AGTR2   | 35 |         |    | GPER    | 17 |         |    |         |    |         |    |         |       |         |    |  |  |
|                                    |         |    |         |    |         |    |         |    |         |    |         |    |         |    |         |       |         |    |  |  |
|                                    |         |    |         |    |         |    |         |    |         |    |         |    |         |    |         |       |         |    |  |  |
|                                    |         |    |         |    |         |    |         |    |         |    |         |    |         |    |         |       |         |    |  |  |
| <b>Small airways<br/>(8, 357)</b>  | 96%     |    | 100%    |    | 90%     |    | 88%     |    | 78%     |    | 91%     |    | 88%     |    |         |       |         |    |  |  |
|                                    | RNPEP   | 96 | GR      | 93 | CPA3    | 89 | REN     | 34 | MME     | 45 | ATP6AP2 | 99 | CYP21A2 | 24 |         |       | KLK1    | 55 |  |  |
|                                    | CTSD    | 93 | MR      | 85 | EGFR    | 35 | AGTR1   | 33 | AGTR2   | 26 | AGT     | 47 | CYP11B2 | 21 |         |       | ACE     | 50 |  |  |
|                                    | CTSA    | 93 |         |    | CTSG    | 35 | CYP17A1 | 33 | AKR1D1  | 16 | HSD11B1 | 41 |         |    |         |       | LNPEP   | 49 |  |  |
|                                    | IGF2R   | 89 |         |    | HSD11B2 | 32 | CYP11A1 | 21 | ENPEP   | 4  | AKR1C4  | 38 |         |    |         |       | MAS1    | 22 |  |  |
|                                    | ANPEP   | 84 |         |    |         |    | CMA1    | 21 |         |    |         |    |         |    |         |       | GPER    | 21 |  |  |
|                                    | DPP3    | 79 |         |    |         |    | CYP11B1 | 15 |         |    |         |    |         |    |         |       |         |    |  |  |
|                                    | PREP    | 77 |         |    |         |    |         |    |         |    |         |    |         |    |         |       |         |    |  |  |
|                                    | THOP1   | 68 |         |    |         |    |         |    |         |    |         |    |         |    |         |       |         |    |  |  |
|                                    | ACE2    | 54 |         |    |         |    |         |    |         |    |         |    |         |    |         |       |         |    |  |  |
| <b>Esophagus<br/>(3, 83)</b>       | 92%     |    | 92%     |    | 92%     |    | 100%    |    | 92%     |    | 92%     |    |         |    |         |       |         |    |  |  |
|                                    | RNPEP   | 91 | GR      | 82 | CPA3    | 72 | AGT     | 42 | CYP21A2 | 30 | ATP6AP2 | 95 |         |    |         |       | EGFR    | 62 |  |  |
|                                    | CTSA    | 90 | AGTR1   | 31 | CTSG    | 57 | GPER    | 34 | ACE     | 14 | IGF2R   | 83 |         |    |         |       | KLK1    | 56 |  |  |
|                                    | CTSD    | 78 | MR      | 30 | CMA1    | 26 | HSD11B1 | 33 | AKR1C4  | 13 | LNPEP   | 28 |         |    |         |       | MAS1    | 48 |  |  |
|                                    | PREP    | 74 | ENPEP   | 10 |         |    |         |    |         |    |         |    |         |    |         |       | MME     | 42 |  |  |
|                                    | DPP3    | 55 |         |    |         |    |         |    |         |    |         |    |         |    |         |       | CYP17A1 | 40 |  |  |
|                                    | THOP1   | 48 |         |    |         |    |         |    |         |    |         |    |         |    |         |       | CYP11B2 | 39 |  |  |
|                                    | CYP11A1 | 39 |         |    |         |    |         |    |         |    |         |    |         |    |         |       | HSD11B2 | 38 |  |  |
|                                    | ACE2    | 36 |         |    |         |    |         |    |         |    |         |    |         |    |         |       | REN     | 33 |  |  |
|                                    |         |    |         |    |         |    |         |    |         |    |         |    |         |    |         |       | CYP11B1 | 22 |  |  |
|                                    |         |    |         |    |         |    |         |    |         |    |         |    |         |    |         | ANPEP | 21      |    |  |  |

Nehme et al: Atlas of Tissue Renin-Angiotensin-Aldosterone System (RAAS) in Human

|                                  |         |    |         |    |       |         |         |         |         |        |         |      |         |    |         |         |         |
|----------------------------------|---------|----|---------|----|-------|---------|---------|---------|---------|--------|---------|------|---------|----|---------|---------|---------|
|                                  |         |    |         |    |       |         |         |         |         |        |         |      |         |    | AGTR2   | 20      |         |
|                                  |         |    |         |    |       |         |         |         |         |        |         |      |         |    | AKR1D1  | 8       |         |
| <b>Lymphocytes<br/>(6, 184)</b>  | 77%     |    | 95%     |    | 83%   |         | 93%     |         | 83%     |        | 79%     |      | 75%     |    |         |         |         |
|                                  | IGF2R   | 90 | ATP6AP2 | 99 | CTSG  | 61      | EGFR    | 49      | CYP17A1 | 43     | KLK1    | 65   | CTSD    | 70 |         |         |         |
|                                  | CTSA    | 90 | GR      | 95 | ANPEP | 56      | AGT     | 48      | ACE     | 37     | CPA3    | 61   | THOP1   | 58 | HSD11B1 | 50      |         |
|                                  | RNPEP   | 87 | MR      | 90 | MME   | 42      | REN     | 30      | AGTR2   | 37     | LNPEP   | 56   | GPPEP   | 33 | HSD11B2 | 16      |         |
|                                  | PREP    | 79 |         |    | AGTR1 | 42      | AKR1C4  | 23      | CYP11A1 | 35     | ACE2    | 40   | CYP21A2 | 31 |         |         |         |
|                                  | DPP3    | 70 |         |    | MAS1  | 34      | AKR1D1  | 18      |         |        |         |      |         |    |         |         |         |
|                                  | CYP11B1 | 34 |         |    | CMA1  | 26      |         |         |         |        |         |      |         |    |         |         |         |
|                                  | CYP11B2 | 28 |         |    |       |         |         |         |         |        |         |      |         |    |         |         |         |
| ENPEP                            | 3       |    |         |    |       |         |         |         |         |        |         |      |         |    |         |         |         |
|                                  |         |    |         |    |       |         |         |         |         |        |         |      |         |    |         |         |         |
| <b>Bone marrow<br/>(8, 208)</b>  | 72%     |    | 75%     |    | 71%   |         | 73%     |         | 78%     |        | 75%     |      | 72%     |    | 67%     |         |         |
|                                  | CTSA    | 86 | GR      | 89 | CTSG  | 87      | CYP21A2 | 36      | EGFR    | 51     | CYP17A1 | 33   | ACE     | 43 | KLK1    | 57      |         |
|                                  | RNPEP   | 82 | ANPEP   | 70 | CPA3  | 76      | MR      | 32      | GPPEP   | 40     | AGTR1   | 31   | AGT     | 39 | CYP11B2 | 47      |         |
|                                  | PREP    | 74 | LNPEP   | 55 | DPP3  | 72      | CYP11B1 | 26      | HSD11B2 | 31     | MAS1    | 22   | REN     | 35 | HSD11B1 | 29      |         |
|                                  | IGF2R   | 71 |         |    |       | CYP11A1 | 25      | ENPEP   | 10      | AKR1D1 | 6       | ACE2 | 23      |    |         |         |         |
|                                  | CTSD    | 70 |         |    |       | AGTR2   | 19      |         |         |        | CMA1    | 22   |         |    |         |         |         |
|                                  |         |    |         |    |       | AKR1C4  | 10      |         |         |        |         |      |         |    |         |         |         |
|                                  |         |    |         |    |       |         |         |         |         |        |         |      |         |    |         |         |         |
| <b>Leukocytes<br/>(4, 222)</b>   | 83%     |    | 75%     |    | 75%   |         | 88%     |         | 79%     |        | 75%     |      | 75%     |    | 75%     |         |         |
|                                  | ATP6AP2 | 98 | MR      | 50 | CTSG  | 56      | CYP17A1 | 36      | KLK1    | 64     | AGT     | 42   | CYP11B1 | 26 | AGTR2   | 21      |         |
|                                  | CTSA    | 97 | CPA3    | 46 | ENPEP | 8       | ACE     | 35      | CYP11B2 | 58     | AGTR1   | 24   | AKR1D1  | 6  | AKR1C4  | 9       |         |
|                                  | RNPEP   | 93 |         |    |       | HSD11B2 | 31      | GPPEP   | 55      |        |         |      |         |    |         |         |         |
|                                  | CTSD    | 91 |         |    |       | REN     | 30      | CYP21A2 | 41      |        |         |      |         |    |         |         |         |
|                                  | PREP    | 78 |         |    |       | CMA1    | 22      | HSD11B1 | 34      |        |         |      |         |    |         |         |         |
|                                  | DPP3    | 75 |         |    |       | ACE2    | 19      | CYP11A1 | 23      |        |         |      |         |    |         |         |         |
|                                  |         |    |         |    |       |         |         |         |         |        |         |      |         |    |         |         |         |
|                                  |         |    |         |    |       |         |         |         |         |        |         |      |         |    |         |         |         |
|                                  |         |    |         |    |       |         |         |         |         |        |         |      |         |    |         |         |         |
| <b>Total Blood<br/>(17, 774)</b> | 76%     |    | 69%     |    | 65%   |         | 71%     |         | 69%     |        |         |      |         |    |         |         |         |
|                                  | IGF2R   | 96 | ATP6AP2 | 97 | PREP  | 79      | HSD11B1 | 44      | REN     | 33     |         |      |         |    |         | CPA3    |         |
|                                  | CTSA    | 96 | GR      | 94 | DPP3  | 74      | CYP17A1 | 36      | CYP11B1 | 32     |         |      |         |    |         | KLK1    |         |
|                                  | MME     | 95 | MR      | 57 |       |         |         |         | AKR1D1  | 11     |         |      |         |    |         | CTSG    |         |
|                                  | ANPEP   | 94 | LNPEP   | 48 |       |         |         |         |         |        |         |      |         |    |         | THOP1   |         |
|                                  | RNPEP   | 91 |         |    |       |         |         |         |         |        |         |      |         |    |         | GPPEP   |         |
|                                  | CTSD    | 82 |         |    |       |         |         |         |         |        |         |      |         |    |         | AGT     |         |
|                                  |         |    |         |    |       |         |         |         |         |        |         |      |         |    |         |         | CYP11B2 |
|                                  |         |    |         |    |       |         |         |         |         |        |         |      |         |    |         |         | EGFR    |
|                                  |         |    |         |    |       |         |         |         |         |        |         |      |         |    |         |         | CYP21A2 |
|                                  |         |    |         |    |       |         |         |         |         |        |         |      |         |    |         |         | ACE     |
|                                  |         |    |         |    |       |         |         |         |         |        |         |      |         |    |         |         | CYP11A1 |
|                                  |         |    |         |    |       |         |         |         |         |        |         |      |         |    |         |         | AGTR1   |
|                                  |         |    |         |    |       |         |         |         |         |        |         |      |         |    |         |         | MAS1    |
|                                  |         |    |         |    |       |         |         |         |         |        |         |      |         |    |         | AGTR2   |         |
|                                  |         |    |         |    |       |         |         |         |         |        |         |      |         |    |         | ACE2    |         |
|                                  |         |    |         |    |       |         |         |         |         |        |         |      |         |    |         | CMA1    |         |
|                                  |         |    |         |    |       |         |         |         |         |        |         |      |         |    |         | HSD11B2 |         |
|                                  |         |    |         |    |       |         |         |         |         |        |         |      |         |    |         | AKR1C4  |         |
|                                  |         |    |         |    |       |         |         |         |         |        |         |      |         |    |         | ENPEP   |         |
|                                  |         |    |         |    |       |         |         |         |         |        |         |      |         |    |         |         |         |

Nehme et al: Atlas of Tissue Renin-Angiotensin-Aldosterone System (RAAS) in Human

| PBMC<br>(11, 303) | 71%  |       | 77%     |        | 70%   |      | 68% |         | 79%  |         | 79%     |    |  |  |  |         |       |
|-------------------|------|-------|---------|--------|-------|------|-----|---------|------|---------|---------|----|--|--|--|---------|-------|
|                   | CTSA | 97    | ATP6AP2 | 98     | AGTR2 | 29   | AGT | 40      | KLK1 | 61      | CYP17A1 | 26 |  |  |  |         | ANPEP |
| IGF2R             | 93   | GR    | 94      | AGTR1  | 23    | ACE  | 31  | CYP11B2 | 47   | CYP11A1 | 20      |    |  |  |  | PREP    | 79    |
| RNPEP             | 91   | MR    | 71      | AKR1D1 | 13    | REN  | 30  | GPB     | 40   | ENPEP   | 15      |    |  |  |  | DPP3    | 78    |
| CTSD              | 84   | LNPEP | 65      |        |       | MAS1 | 21  |         |      |         |         |    |  |  |  | MME     | 66    |
| THOP1             | 54   |       |         |        |       |      |     |         |      |         |         |    |  |  |  | CPA3    | 58    |
|                   |      |       |         |        |       |      |     |         |      |         |         |    |  |  |  | CTSG    | 48    |
|                   |      |       |         |        |       |      |     |         |      |         |         |    |  |  |  | CYP21A2 | 34    |
|                   |      |       |         |        |       |      |     |         |      |         |         |    |  |  |  | HSD11B1 | 34    |
|                   |      |       |         |        |       |      |     |         |      |         |         |    |  |  |  | EGFR    | 28    |
|                   |      |       |         |        |       |      |     |         |      |         |         |    |  |  |  | CYP11B1 | 25    |
|                   |      |       |         |        |       |      |     |         |      |         |         |    |  |  |  | HSD11B2 | 23    |
|                   |      |       |         |        |       |      |     |         |      |         |         |    |  |  |  | ACE2    | 20    |
|                   |      |       |         |        |       |      |     |         |      |         |         |    |  |  |  | CMA1    | 18    |
|                   |      |       |         |        |       |      |     |         |      |         |         |    |  |  |  | AKR1C4  | 16    |

## **Supplementary Figure S1: ExtRAAS Gene Expression Profiles Across Studied Tissues**

**Supplementary Figure S1: ExtRAAS gene expression profiles across studied tissues.** The expression profile of each of the extRAAS genes across all studied tissues represented in a bar-graph as mean expression centile rank (MCR)  $\pm$  SEM. A horizontal cut-off line was drawn at the MCR level 33.3.

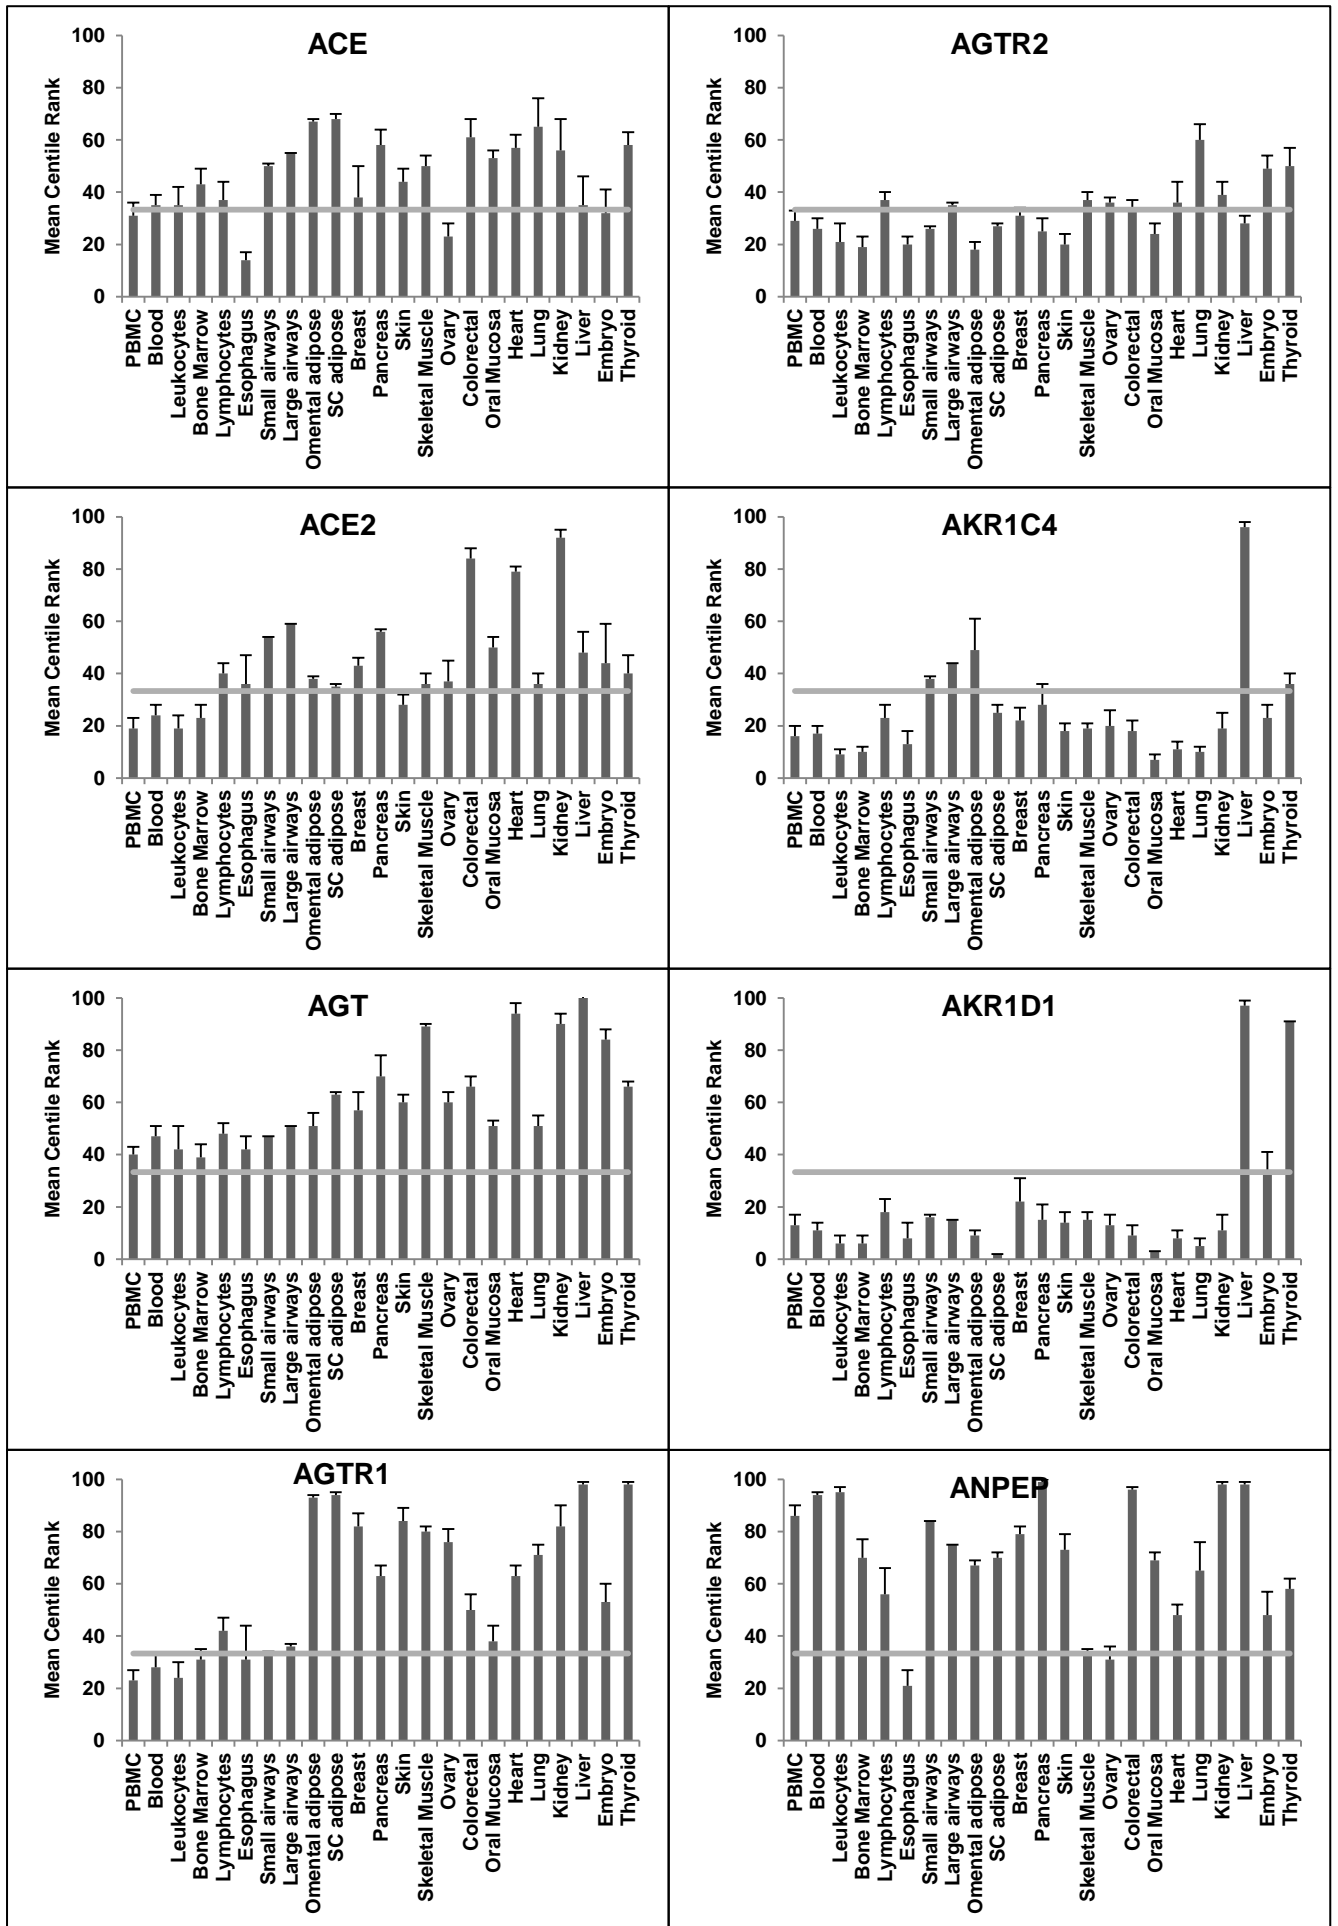

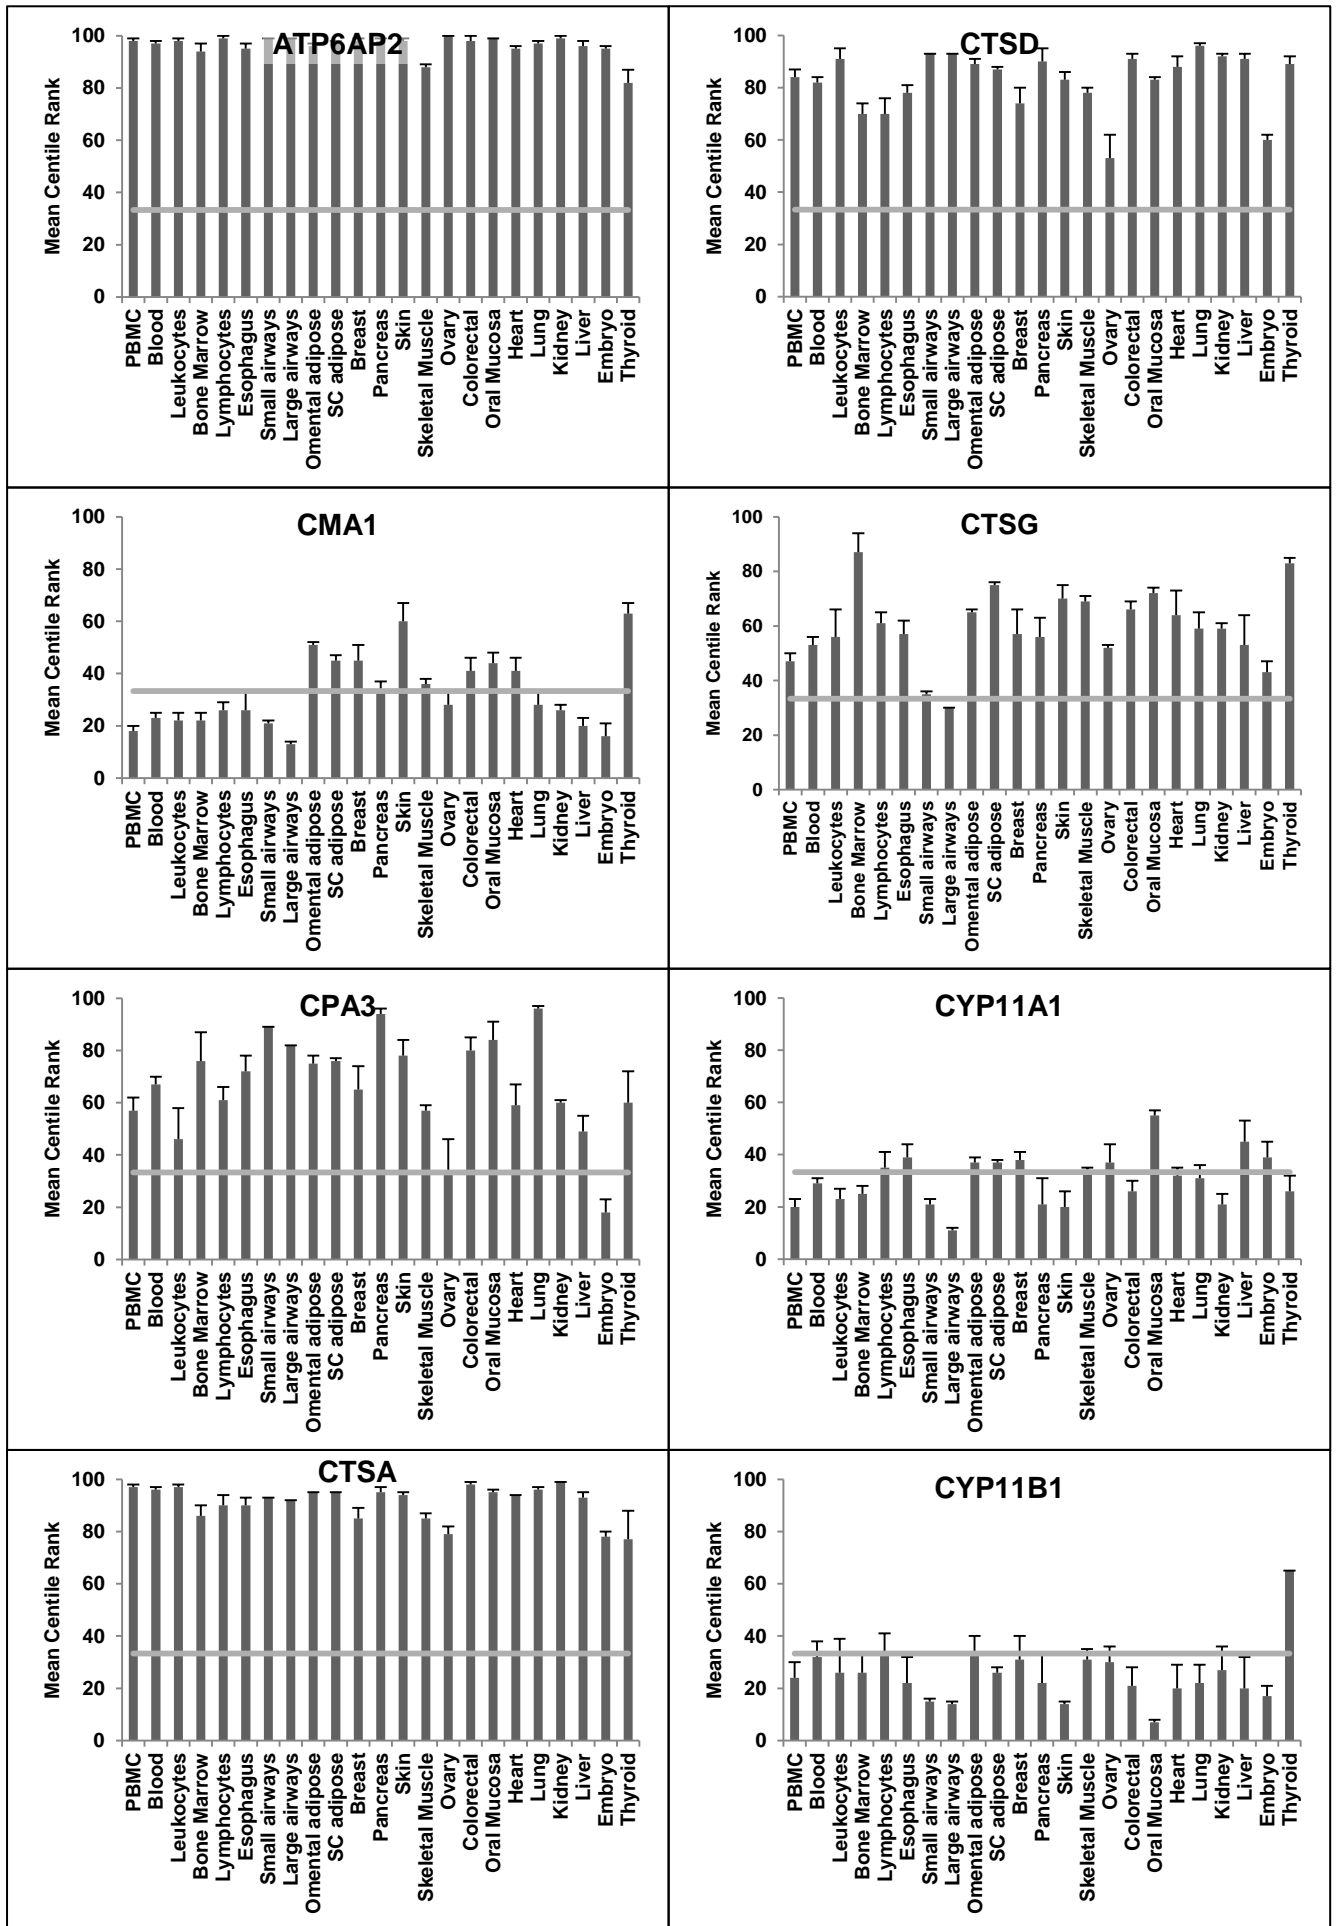



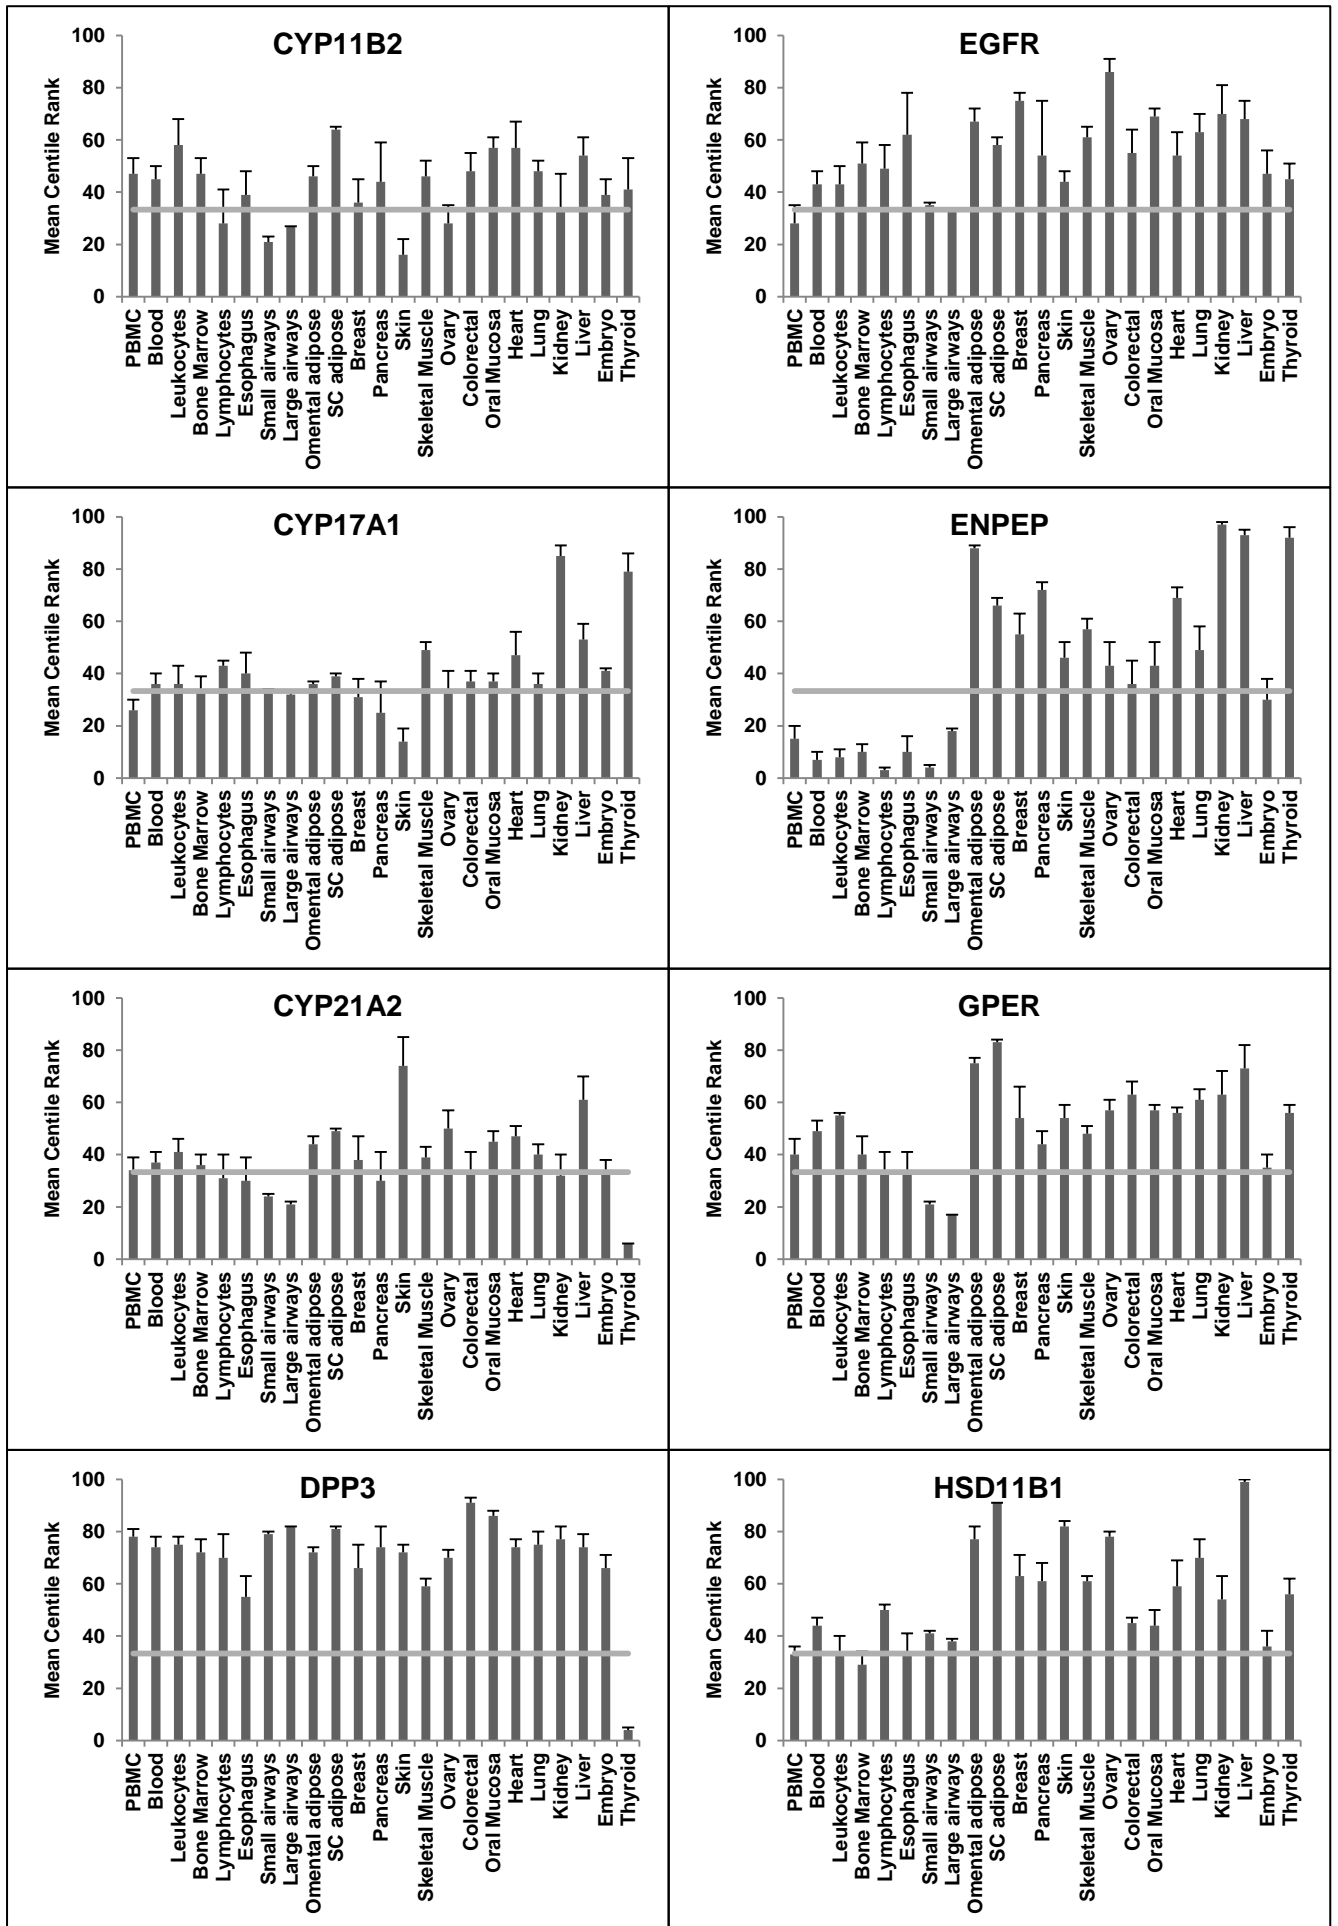

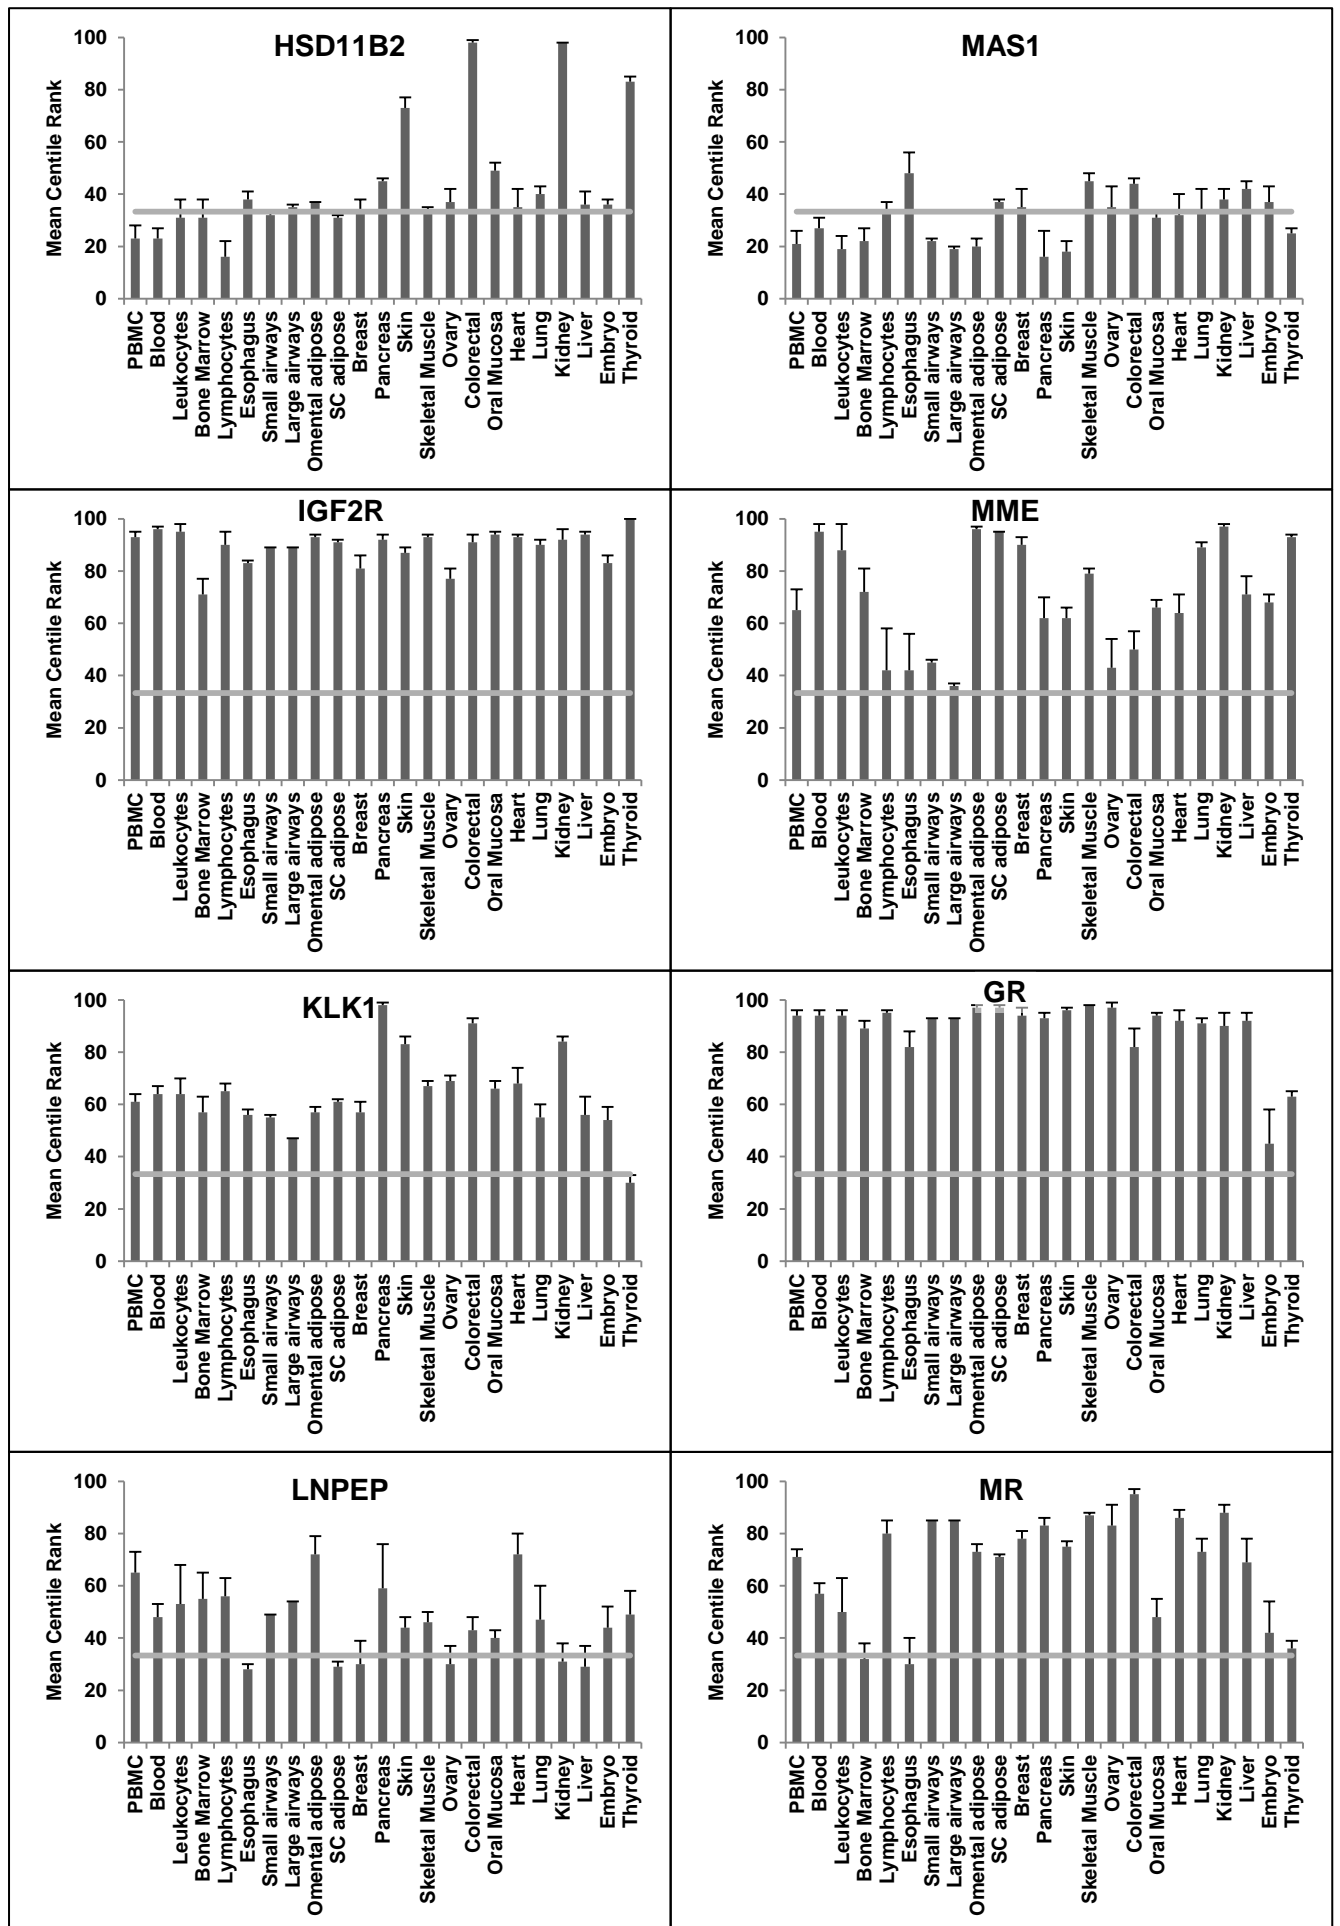

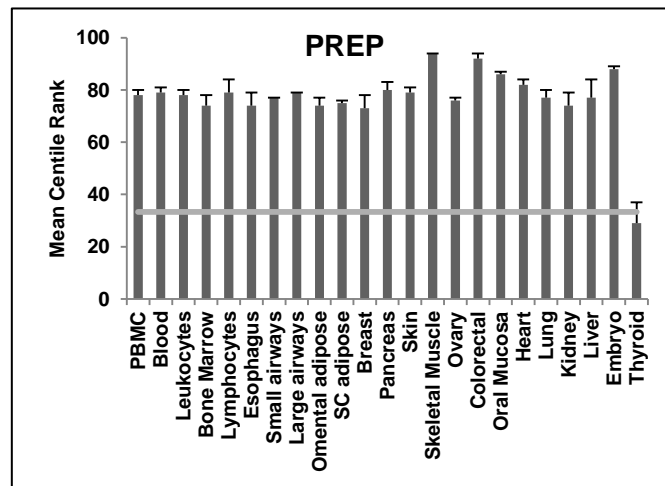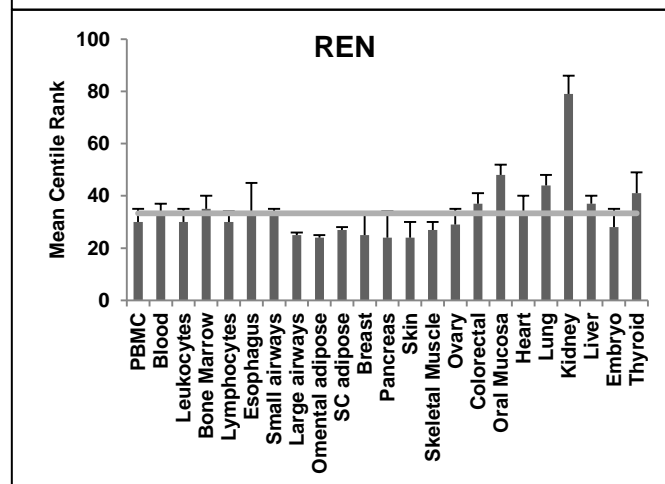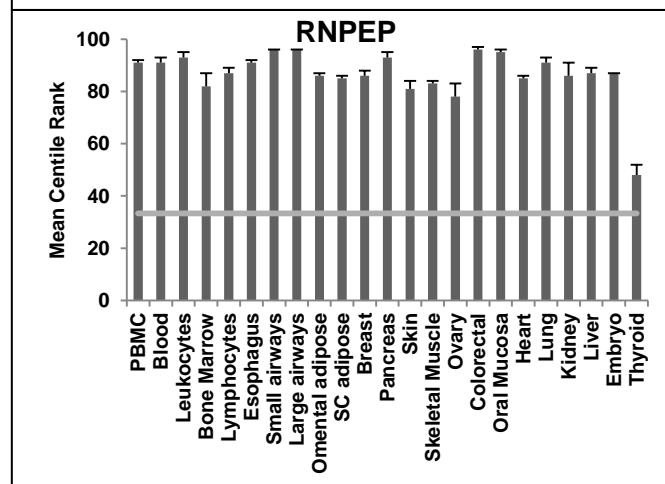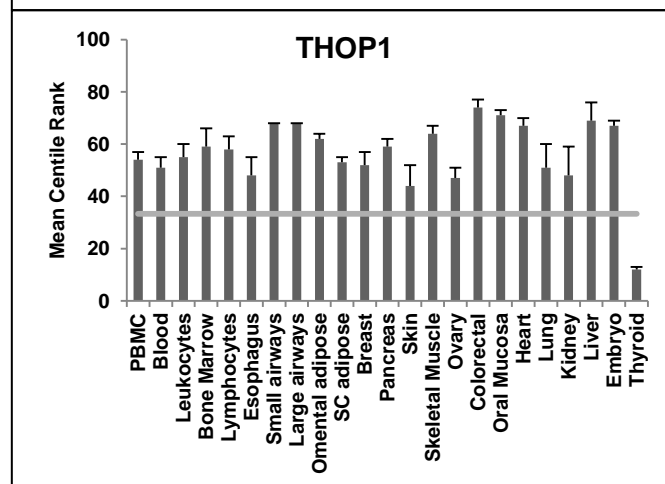

## Supplementary Atlas S1: ExtRAAS Maps in All Studied Tissues

**Supplementary Atlas S1: ExtRAAS maps in all studied tissues.** For each tissue, the number of datasets, samples and modules are represented as (datasets, samples, modules) below the tissue name. Gene transcripts are represented by the corresponding official symbols. The genes are represented in the map based on their coordination (same color = same cluster) and mean expression centile rank (MCR, 4 levels, larger font size= higher expression level). Genes below the first tertile (MCR  $\leq$  33) in each tissue were omitted for simplicity. Non-clustered genes are colored in black. Core group-based modules when present are colored similarly across tissue: CTSA-CTSD-based modules in red; CTSG-CPA3-CMA1-based modules in green; and GR-MR-AGTR1-based modules in dark blue. Angiotensin peptides and corticosteroid metabolites are represented in gray italics. Expression profiles of ExtRAAS genes in each tissue are represented using their MCR in a bar graph. Tissues are arranged based on the tissue dendrogram of figure 5 in the article (see dendrogram below).

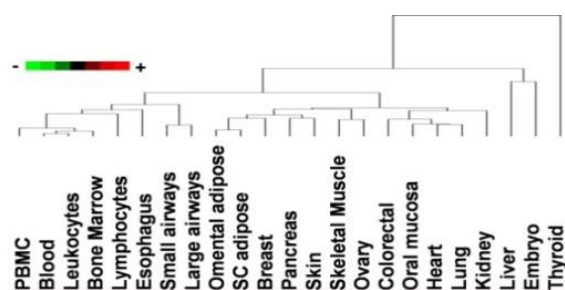

# ExtRAAS

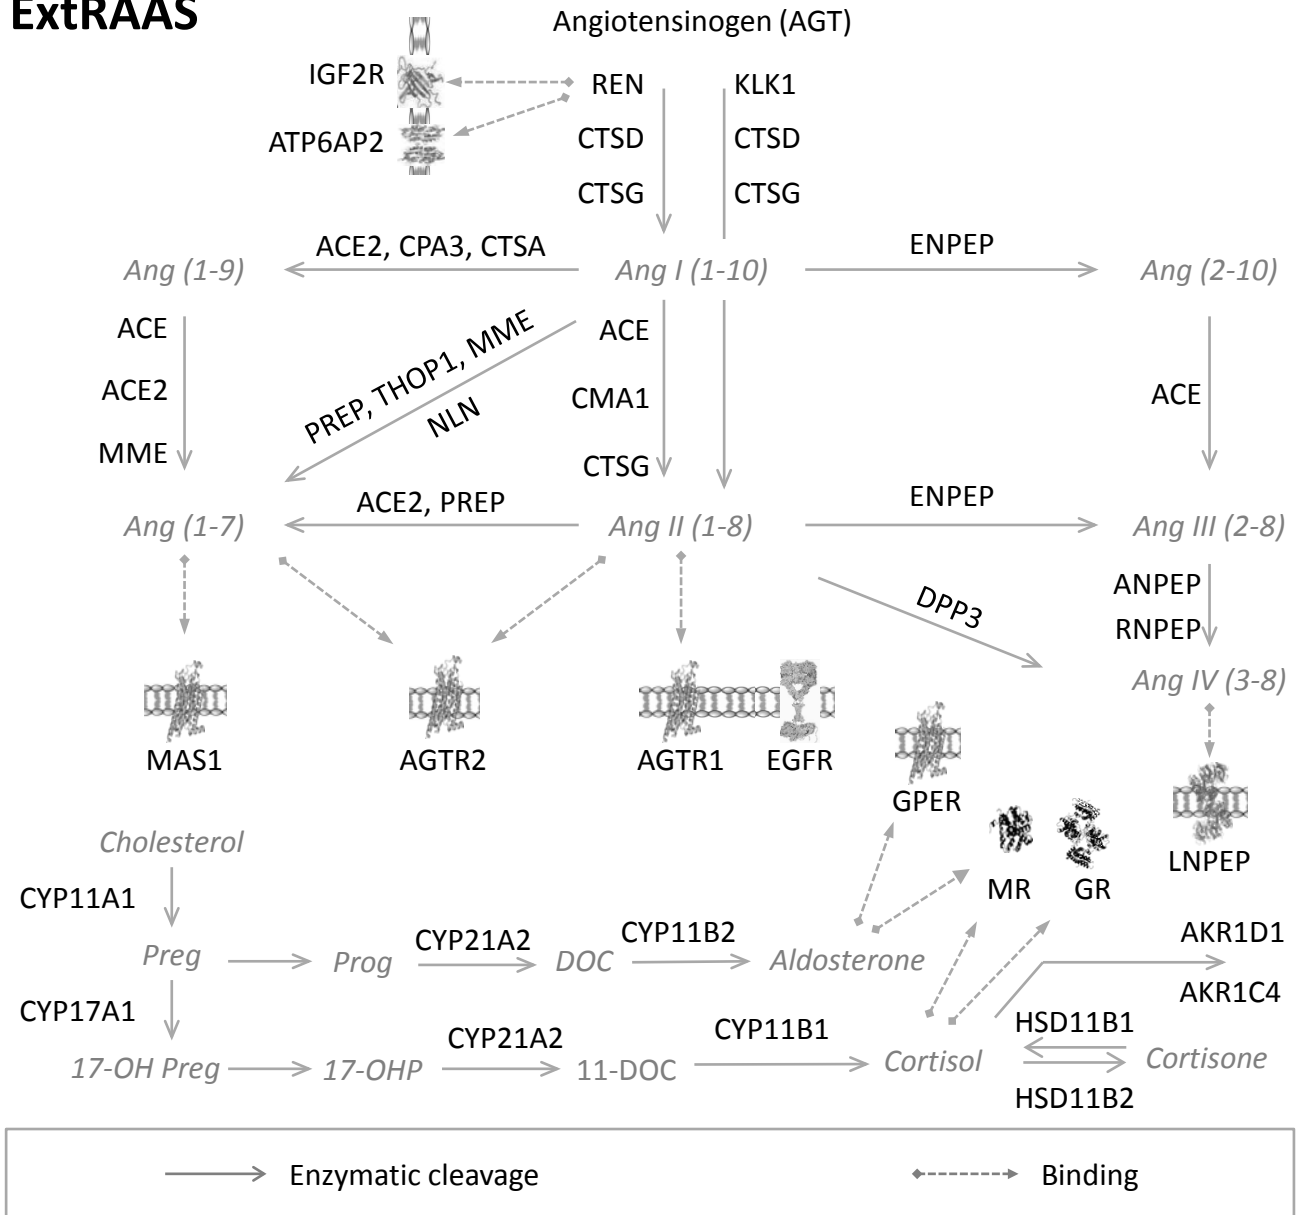

## MCR font size

≤ 33 → eliminated

34-40 → 9

41-60 → 11

61-80 → 14

81-90 → 18

91-100 → 18



# Embryo (3, 54, 6)

## Angiotensinogen (AGT)

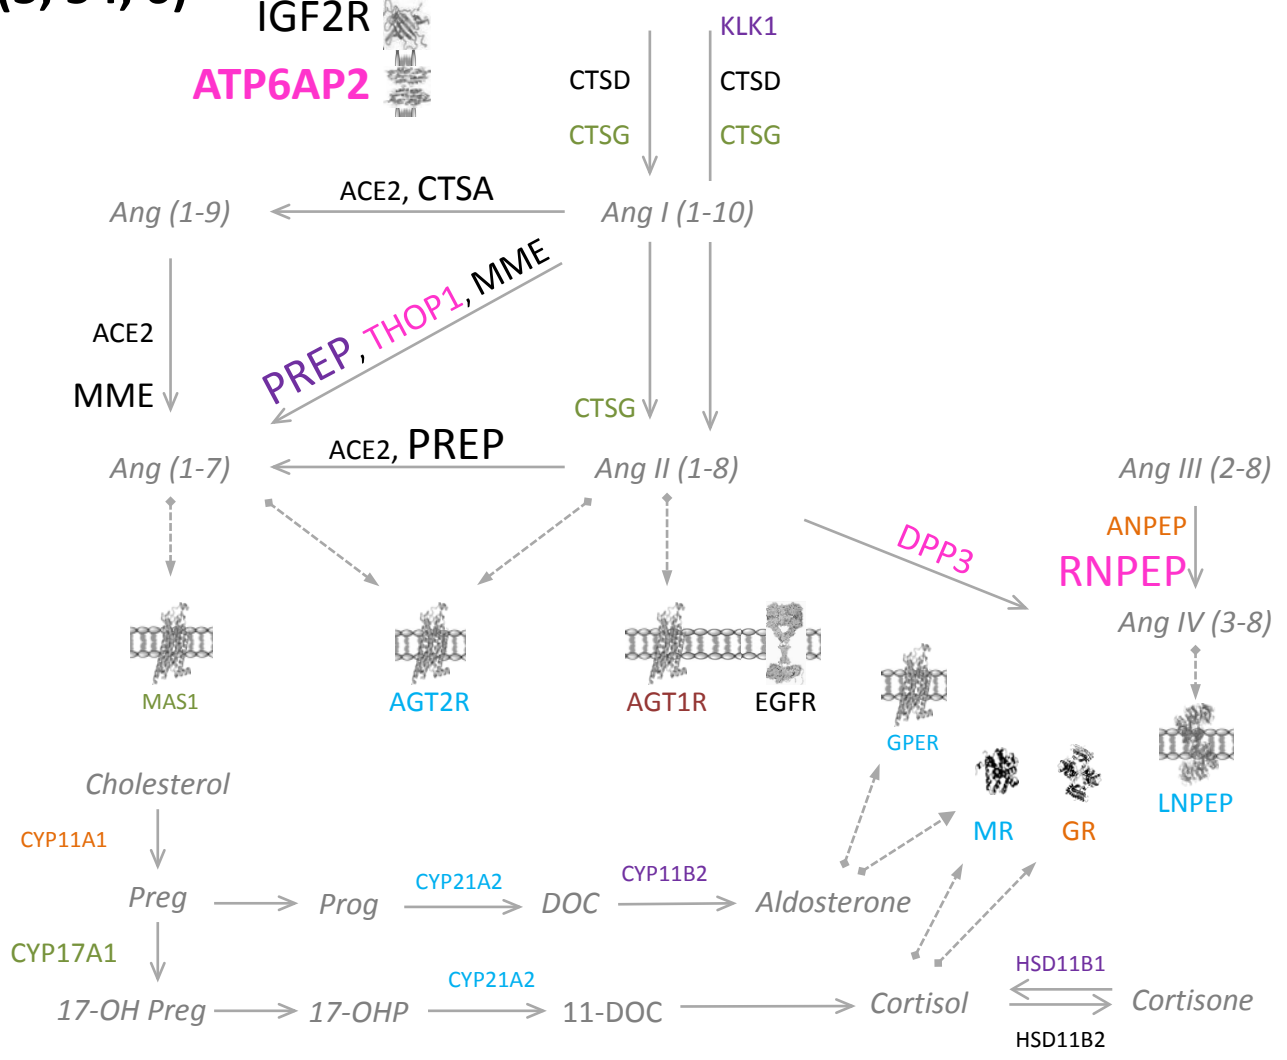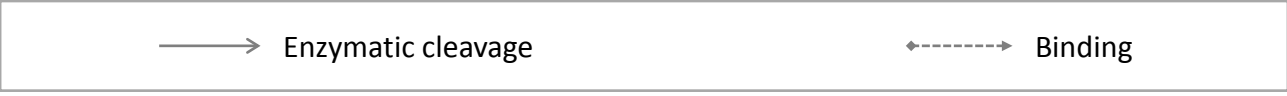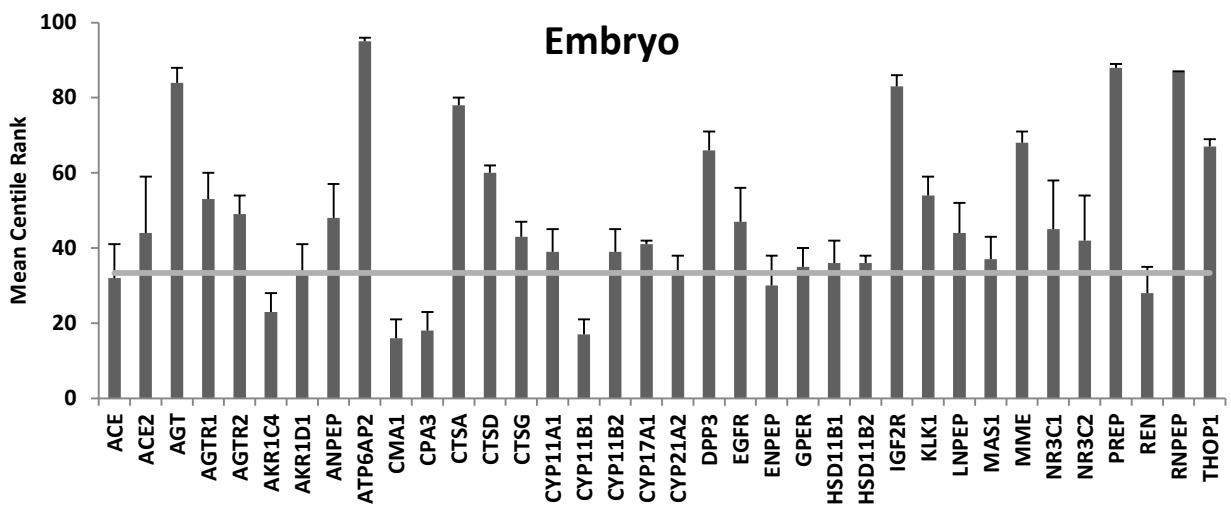





# Kidney (4, 84, 5)

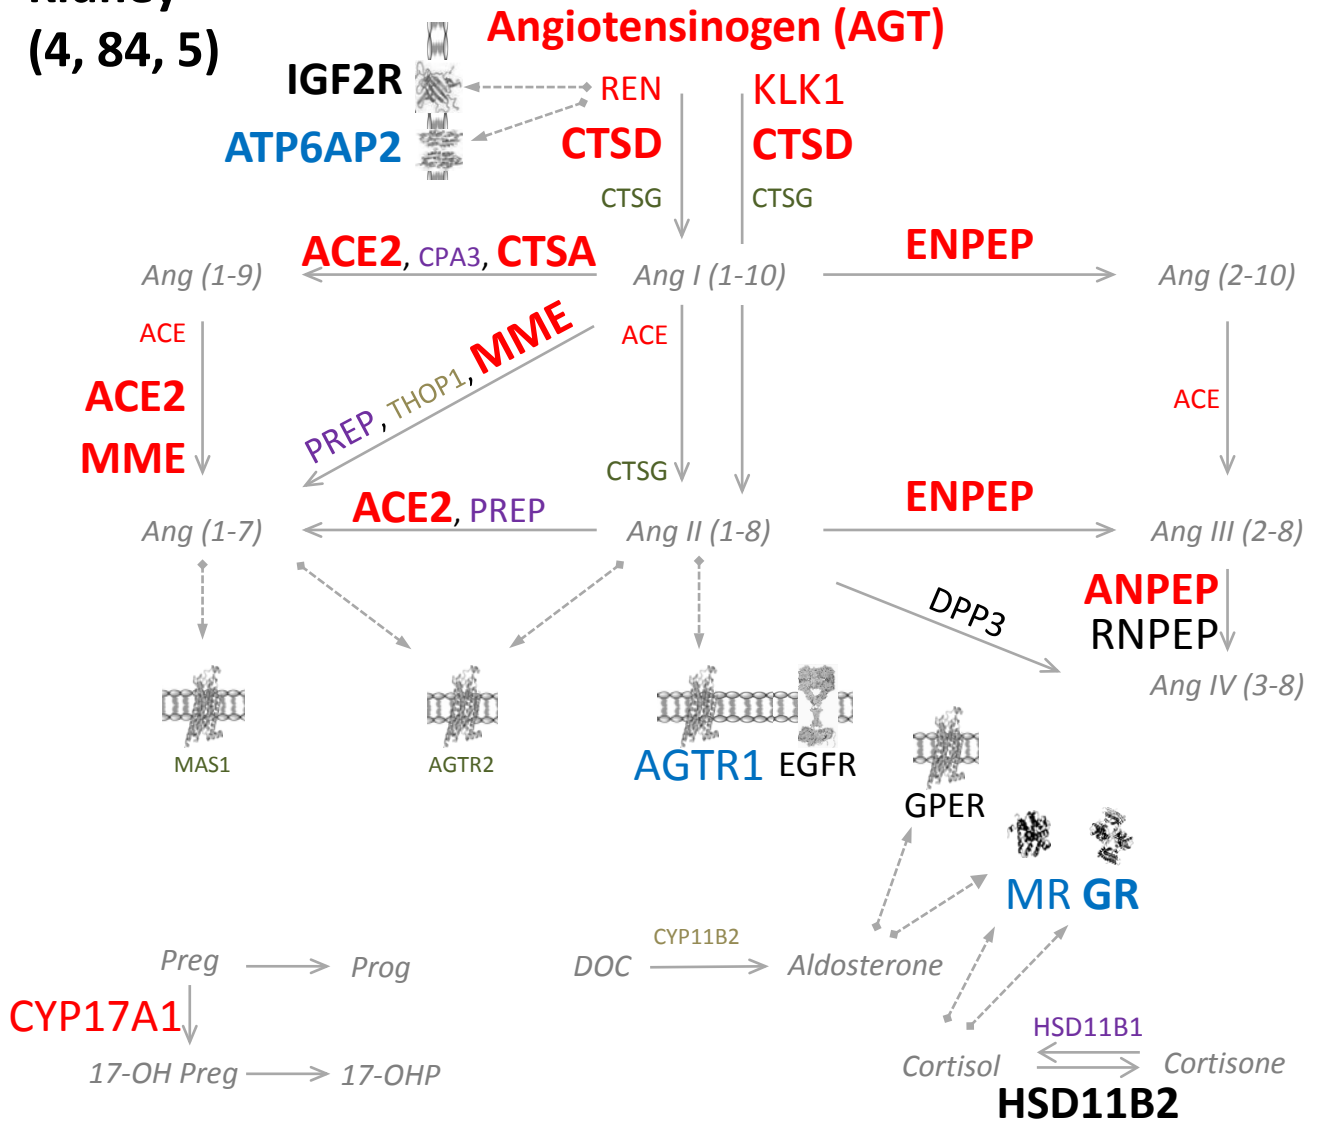

→ Enzymatic cleavage      ← Binding

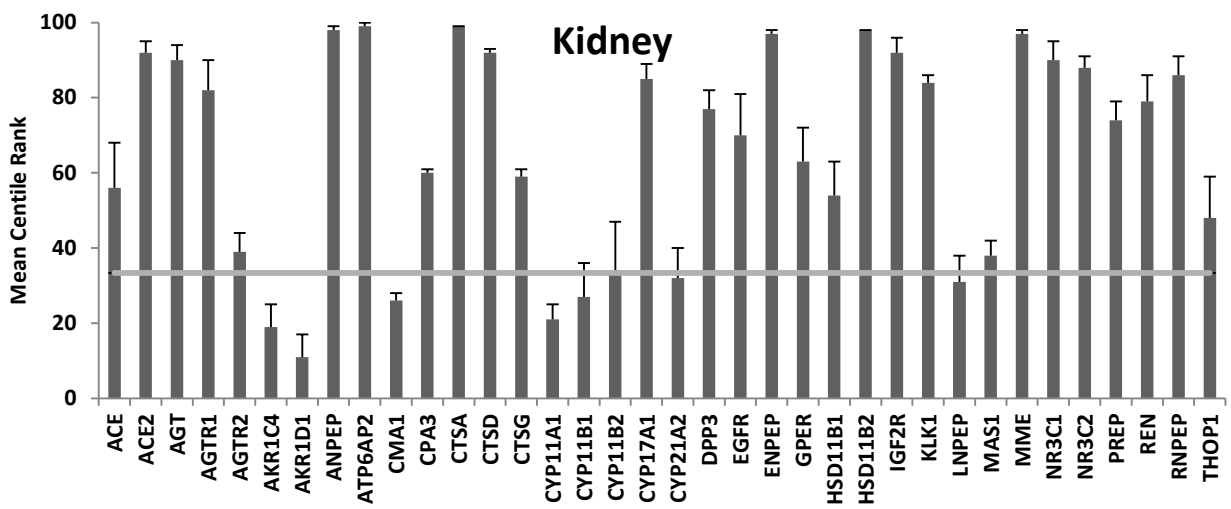

# Lung (5, 210, 8)

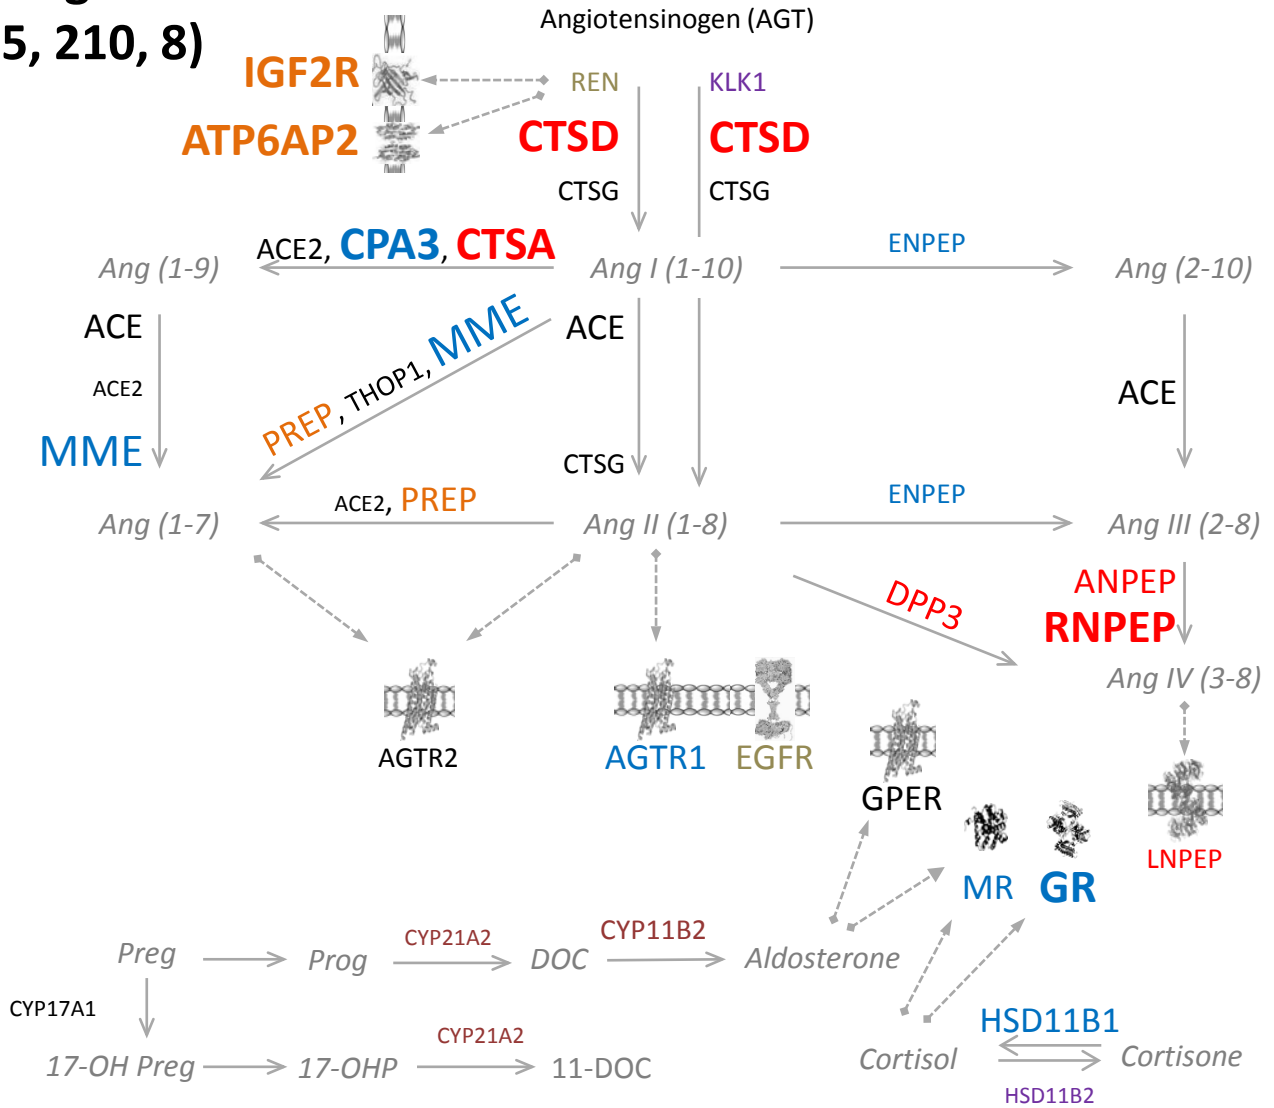

→ Enzymatic cleavage      ↔ Binding

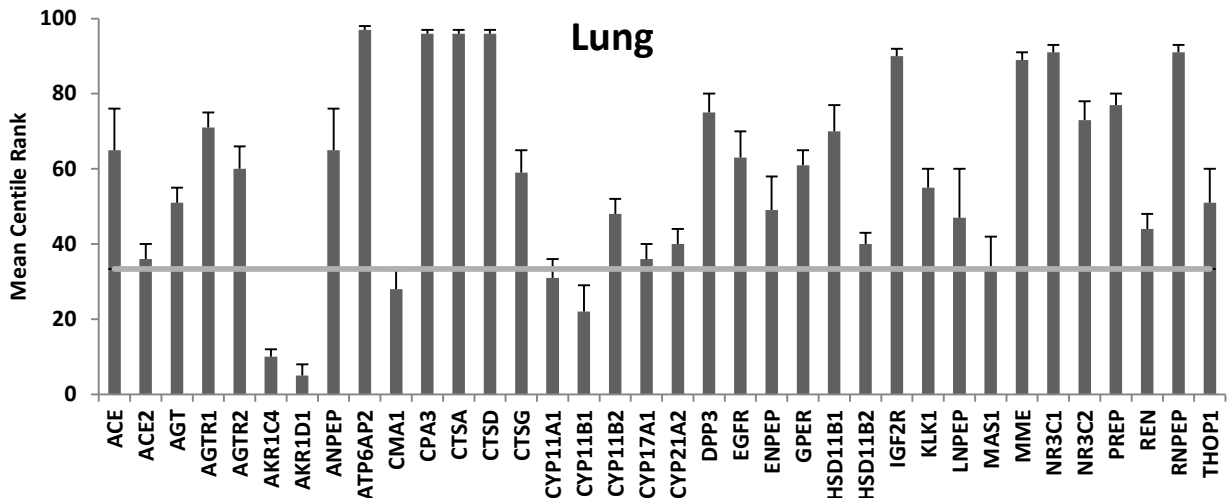

# Heart (4, 140, 7)

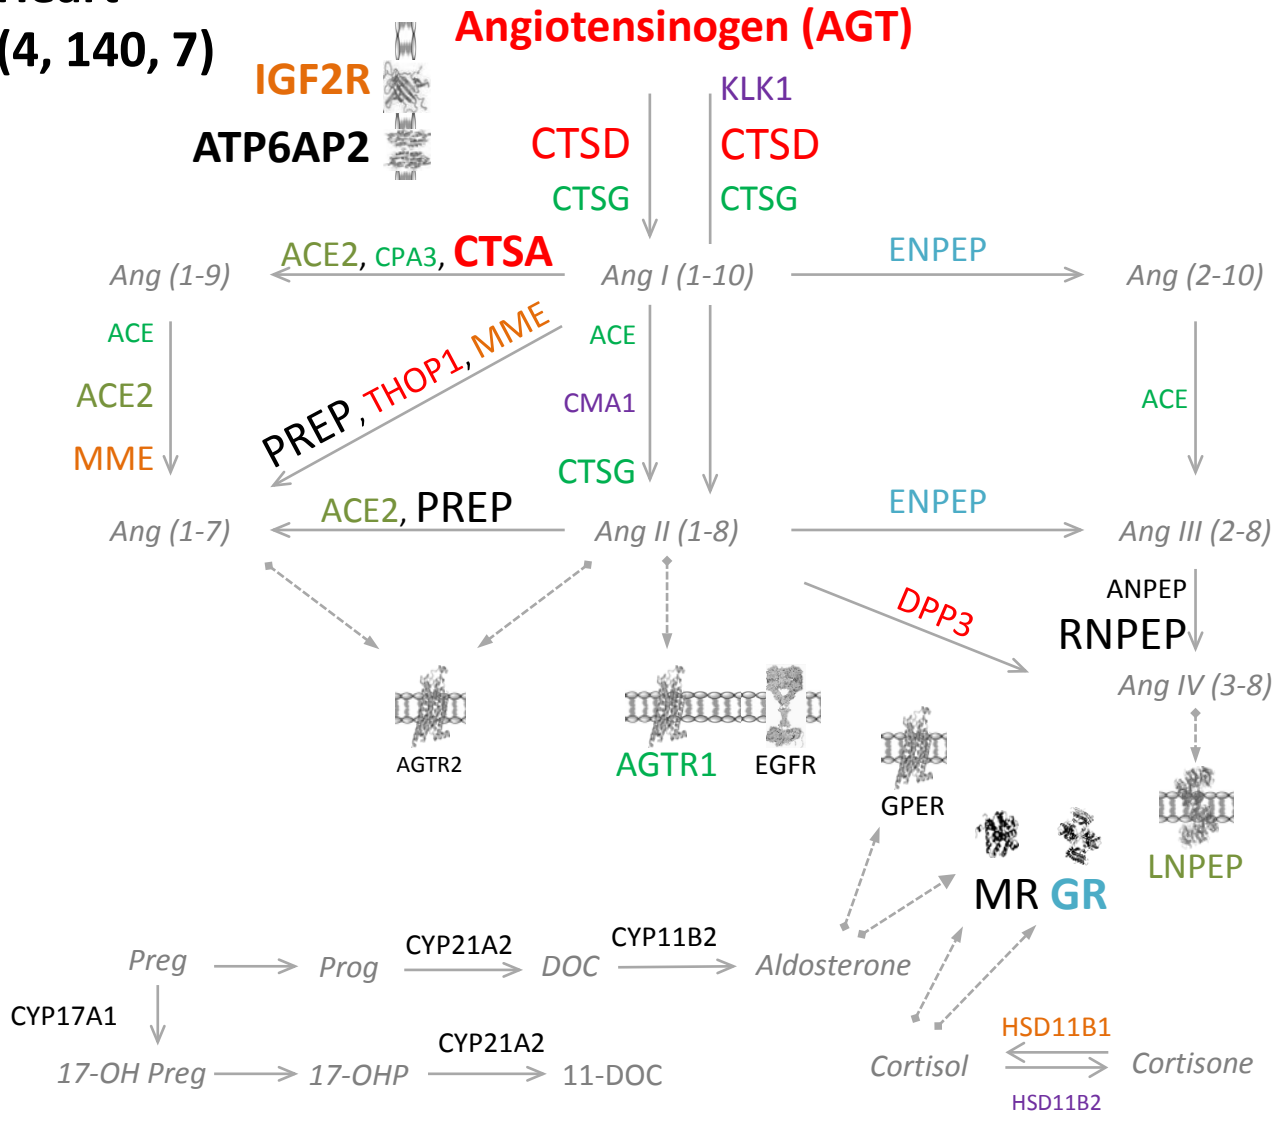

Enzymatic cleavage
  Binding

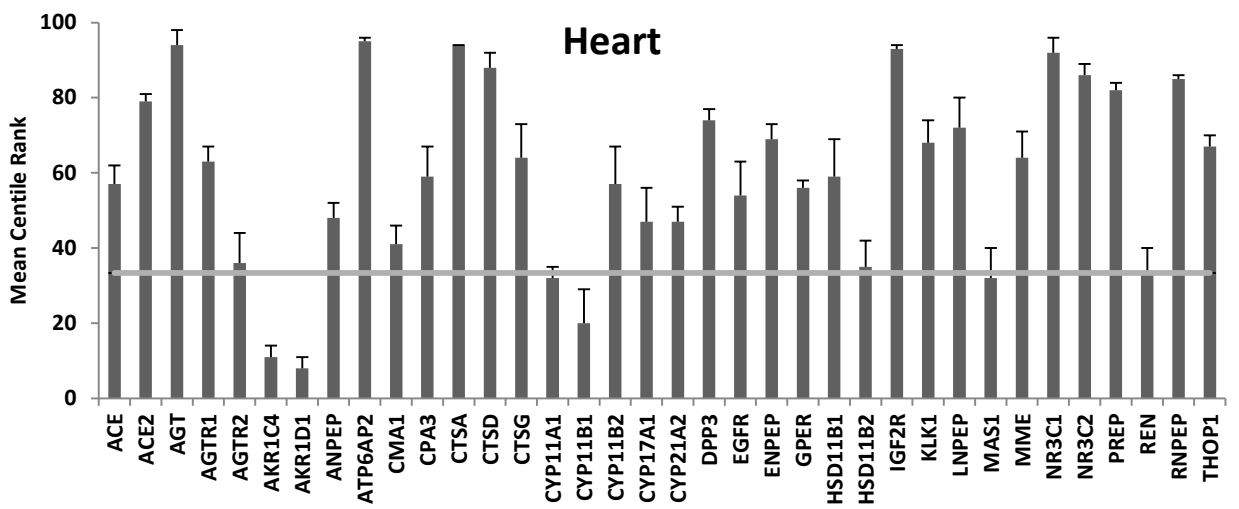

# Oral Mucosa (4, 193, 8)

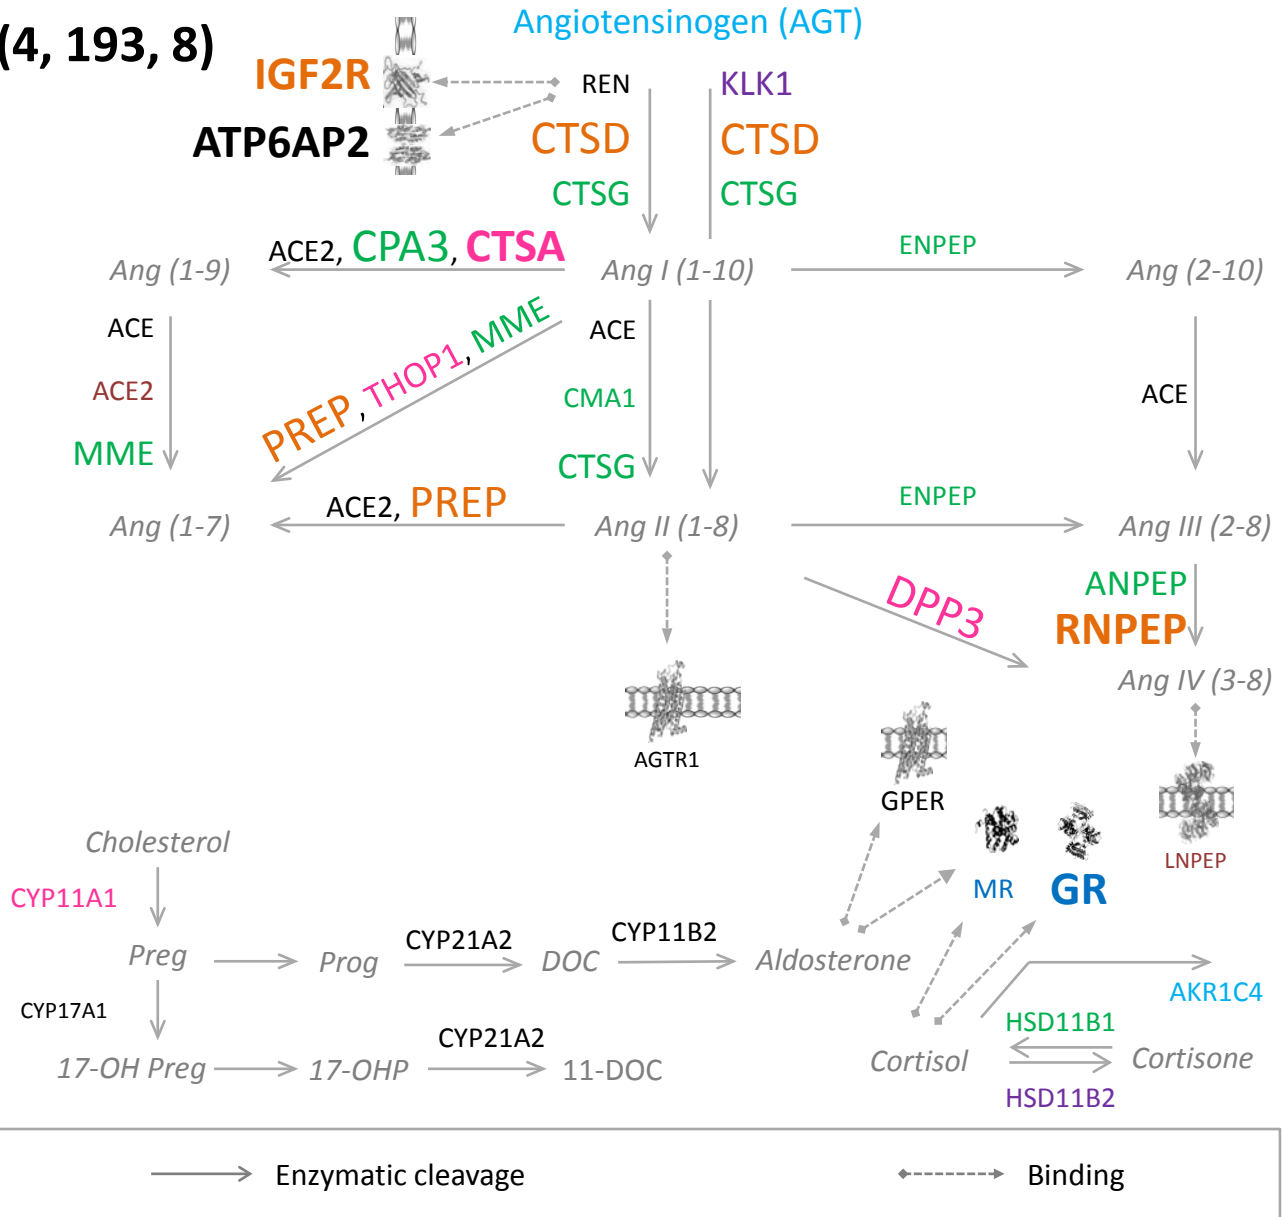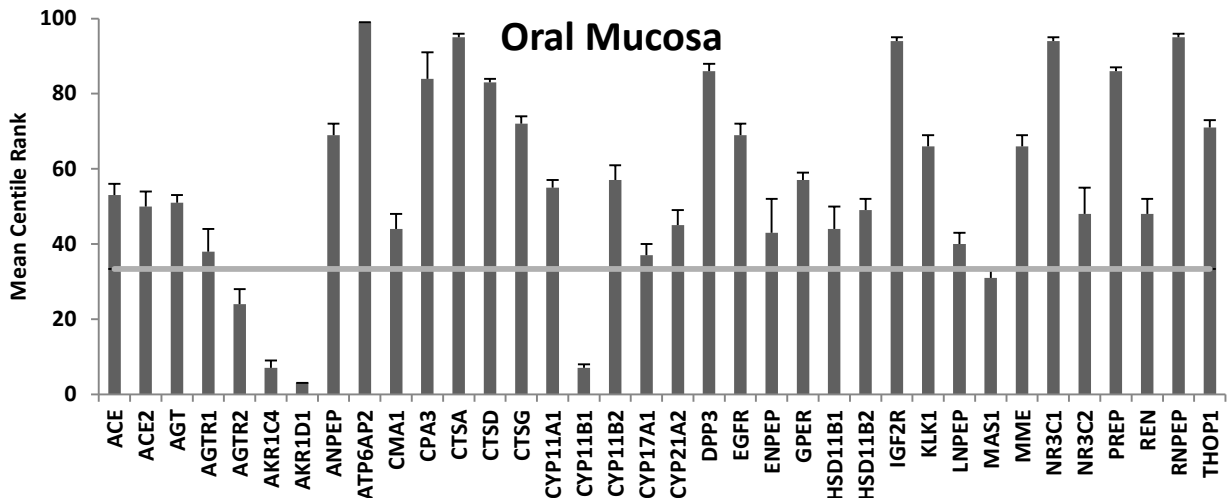

# Colorectal (8, 171, 8)

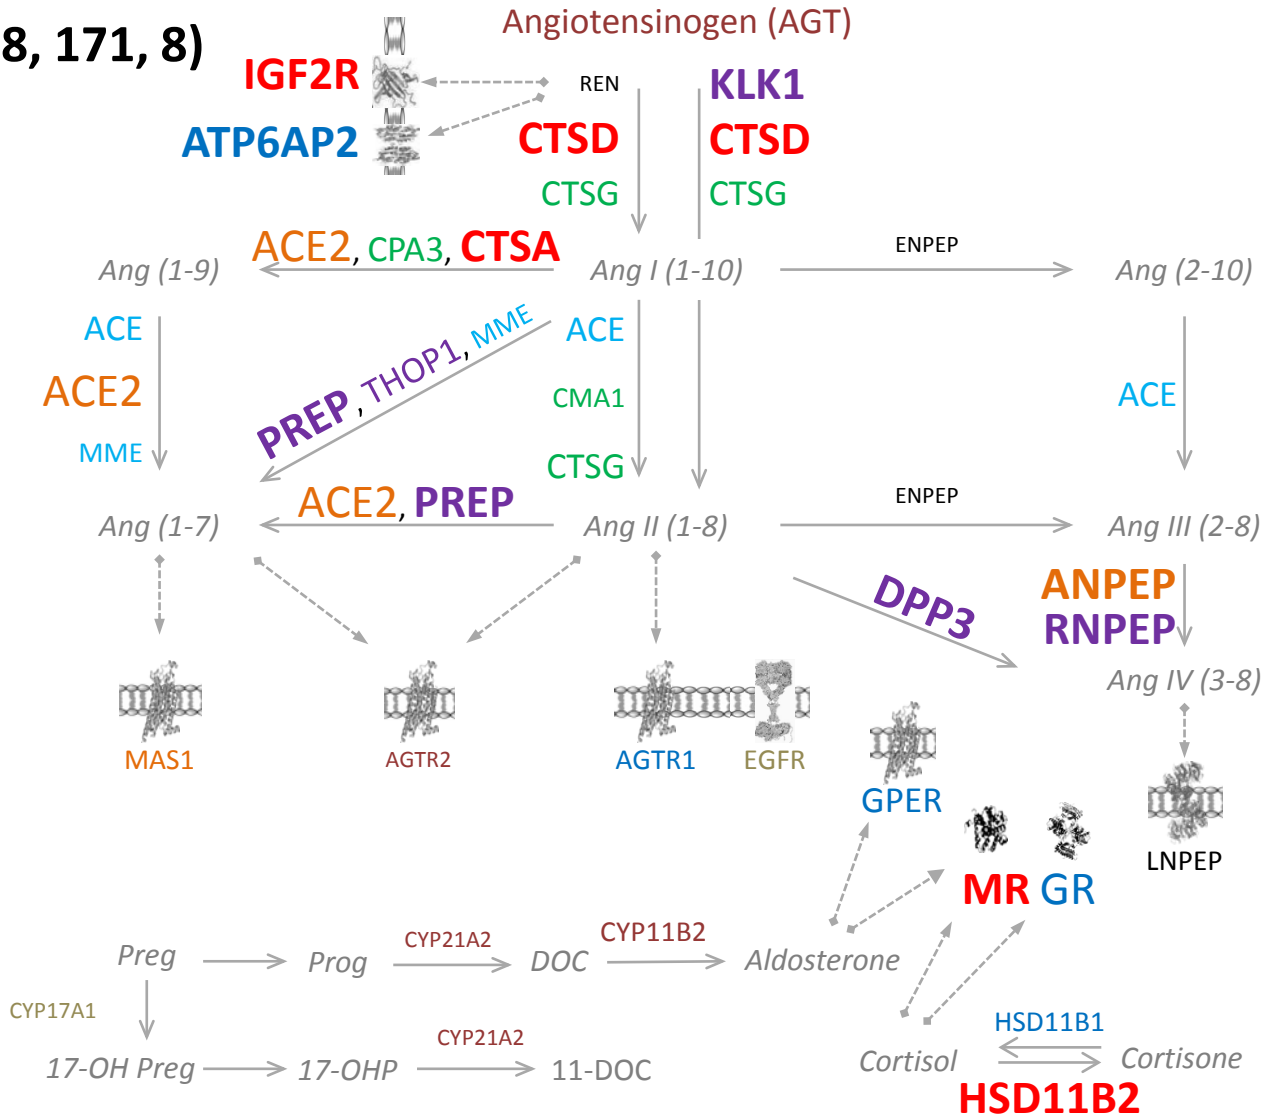

→ Enzymatic cleavage      ← Binding

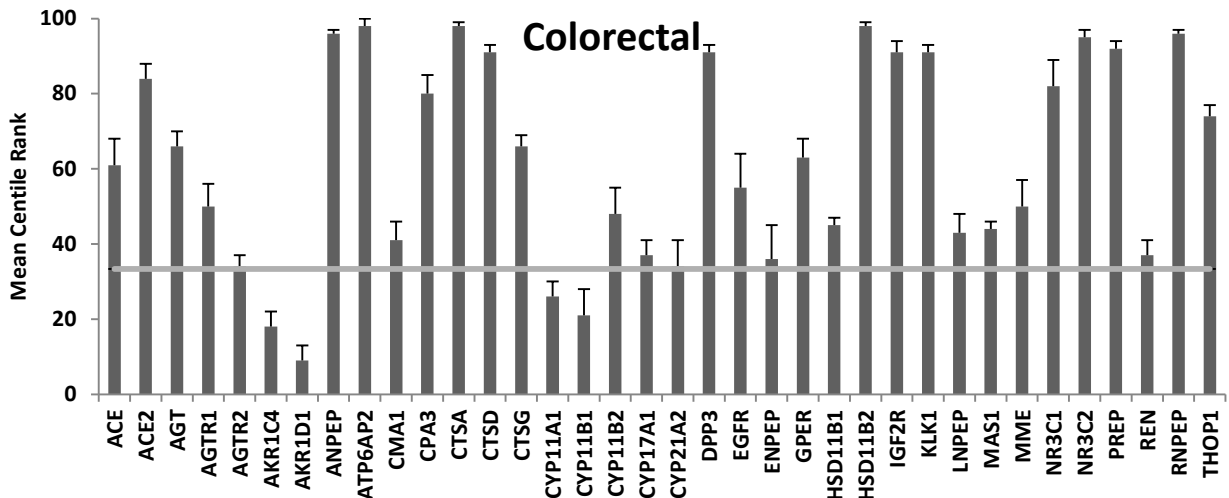

# Ovary Epithelium (5, 55, 8)

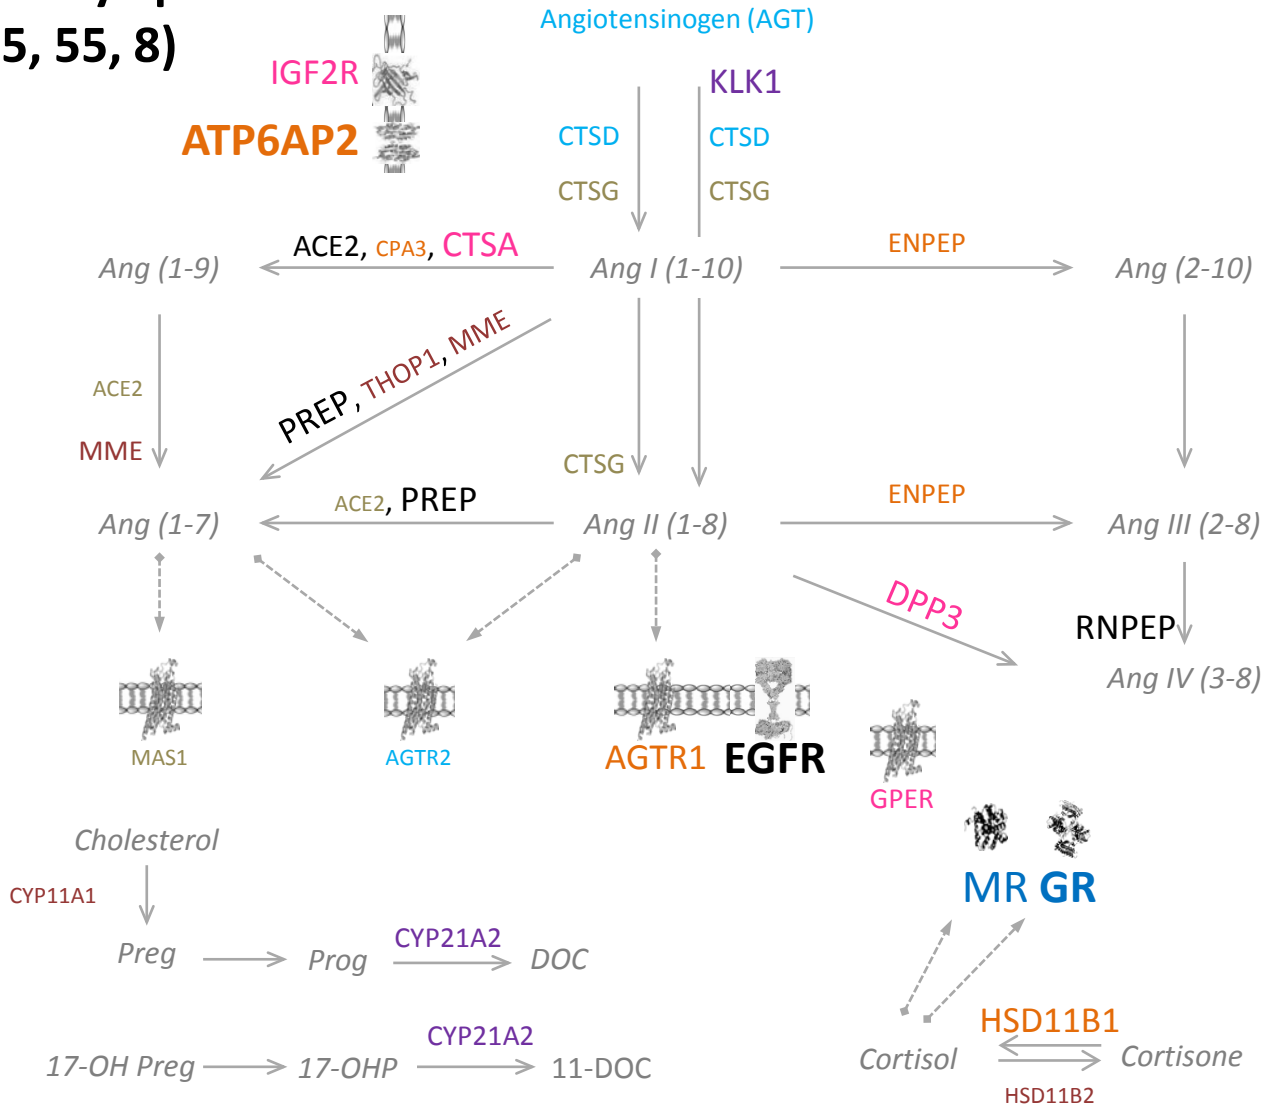

→ Enzymatic cleavage

◊ Binding

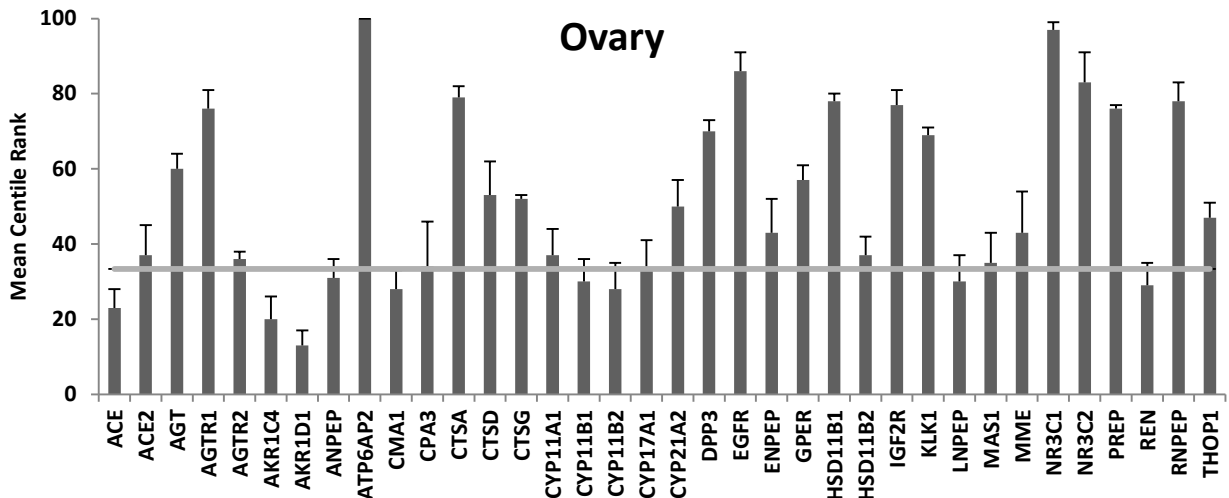

# Skeletal Muscle (14, 556, 6)

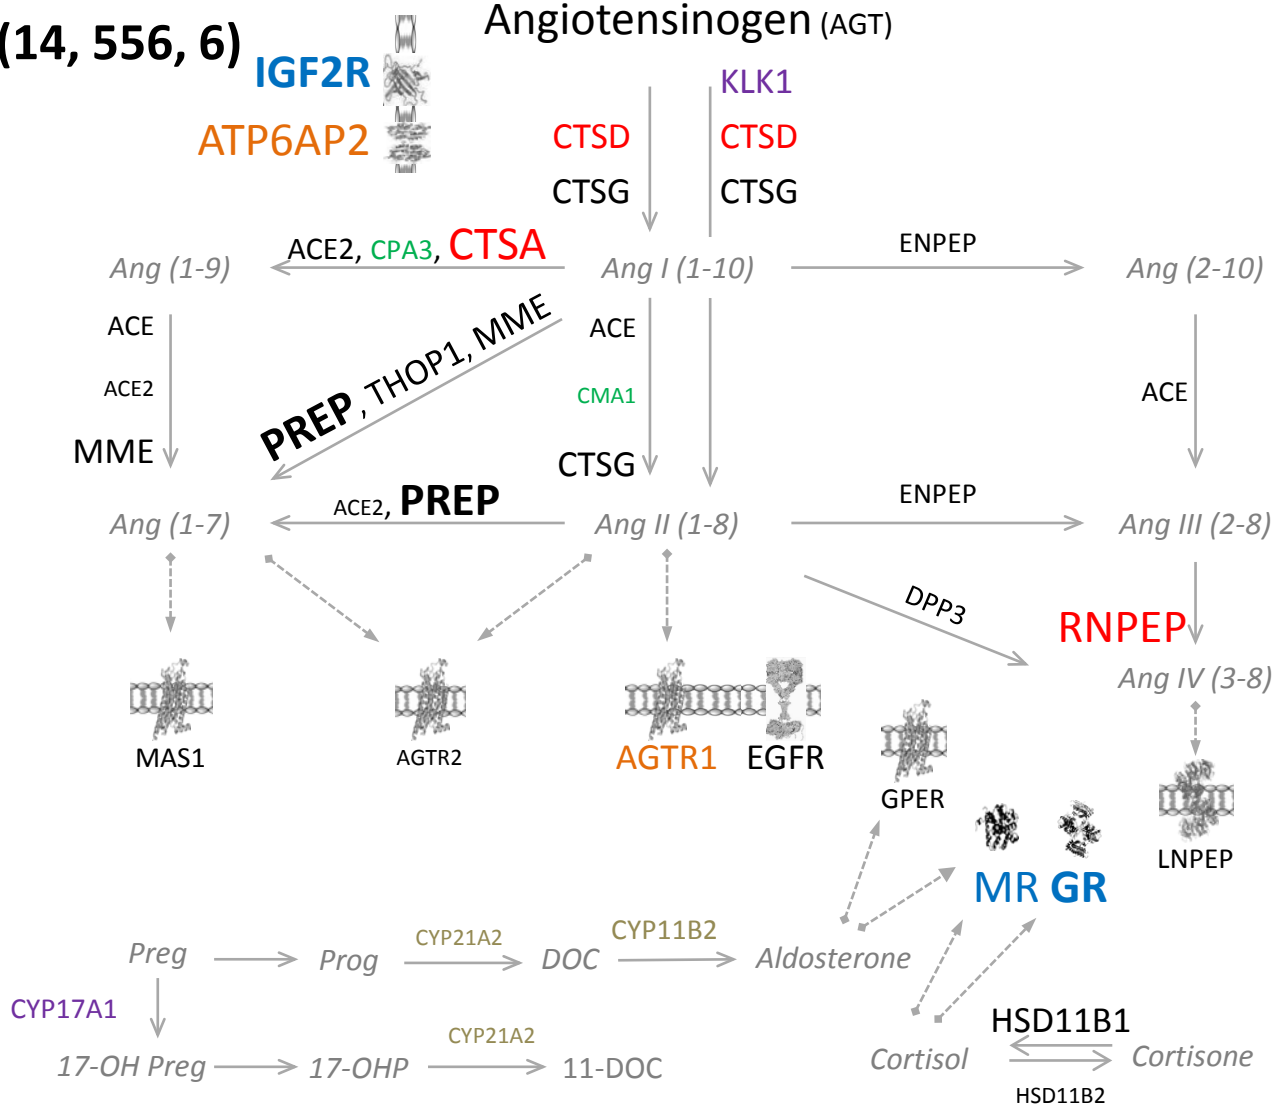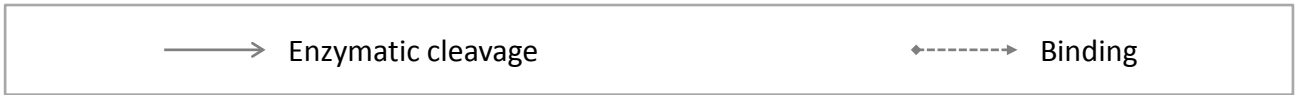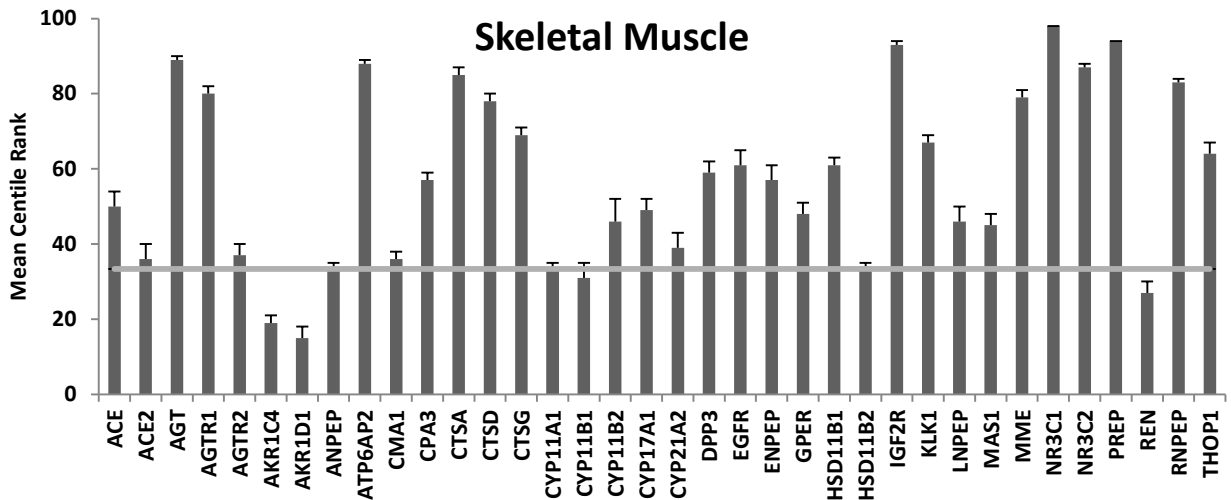

# Skin

(7, 222, 6)

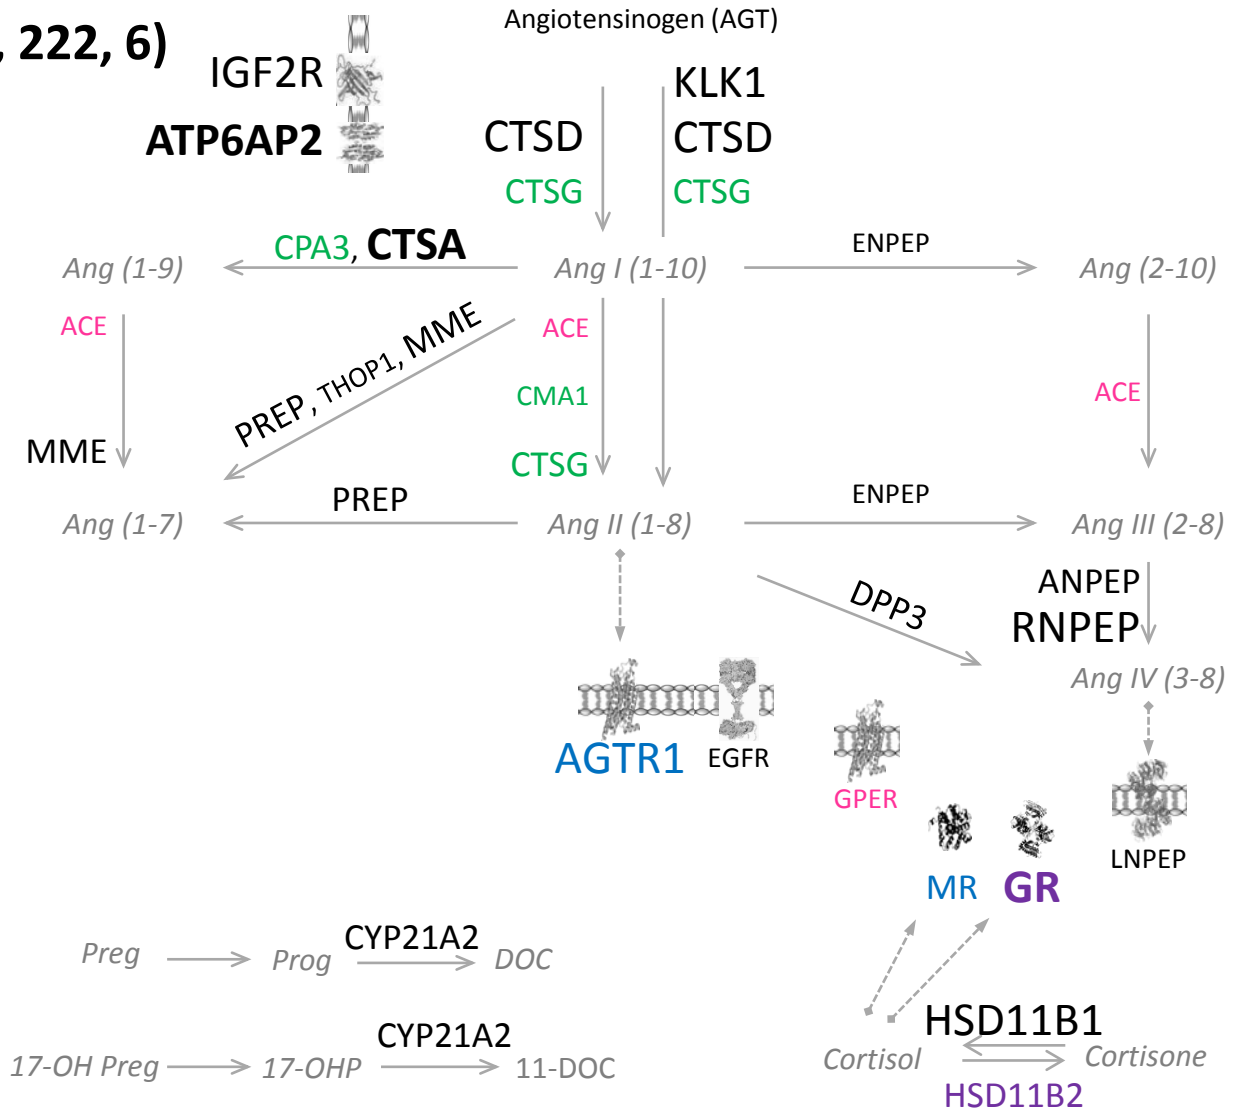

→ Enzymatic cleavage      ◀--- Binding

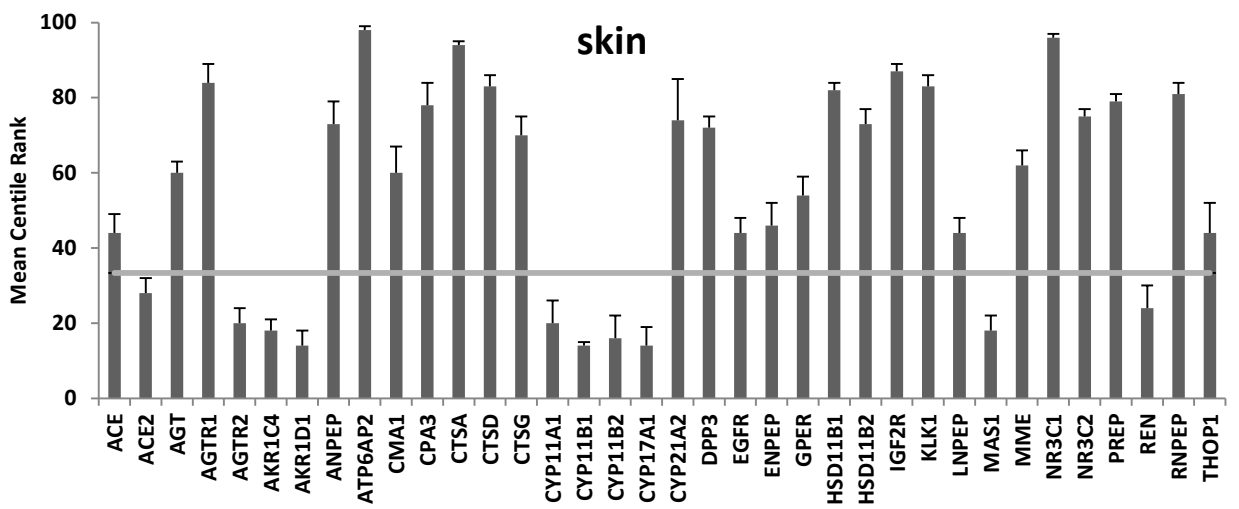



# Pancreas (3, 100, 6)

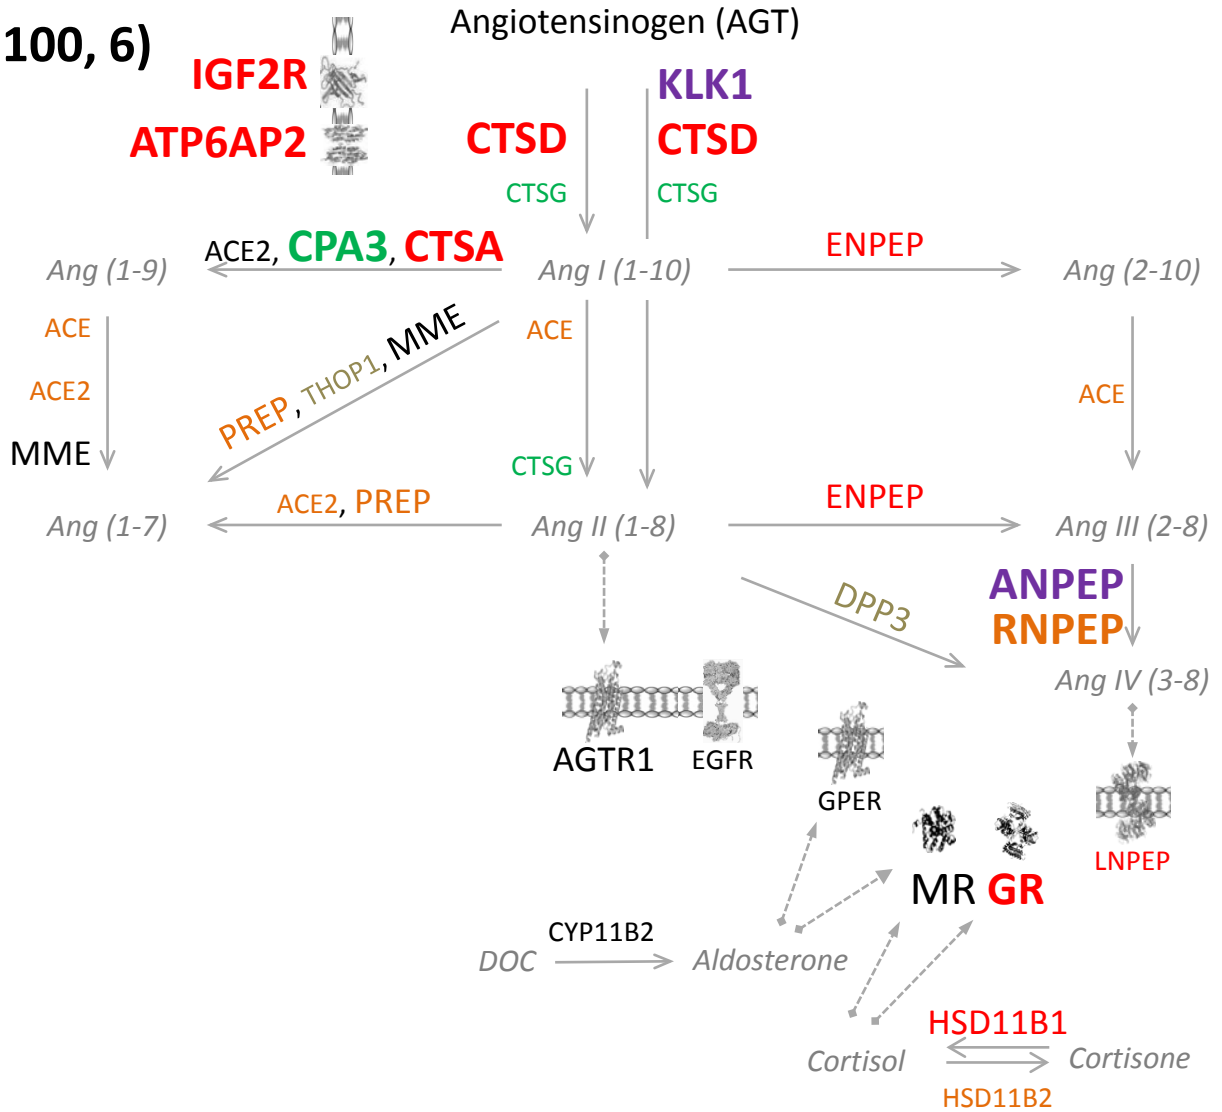

→ Enzymatic cleavage      ⇌ Binding

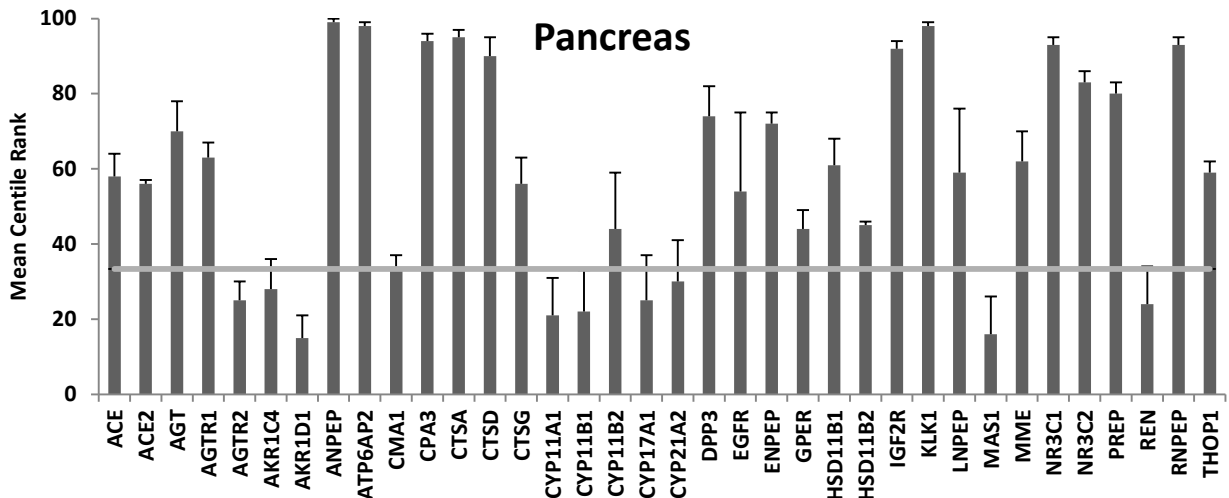

# Breast (6, 239, 7)

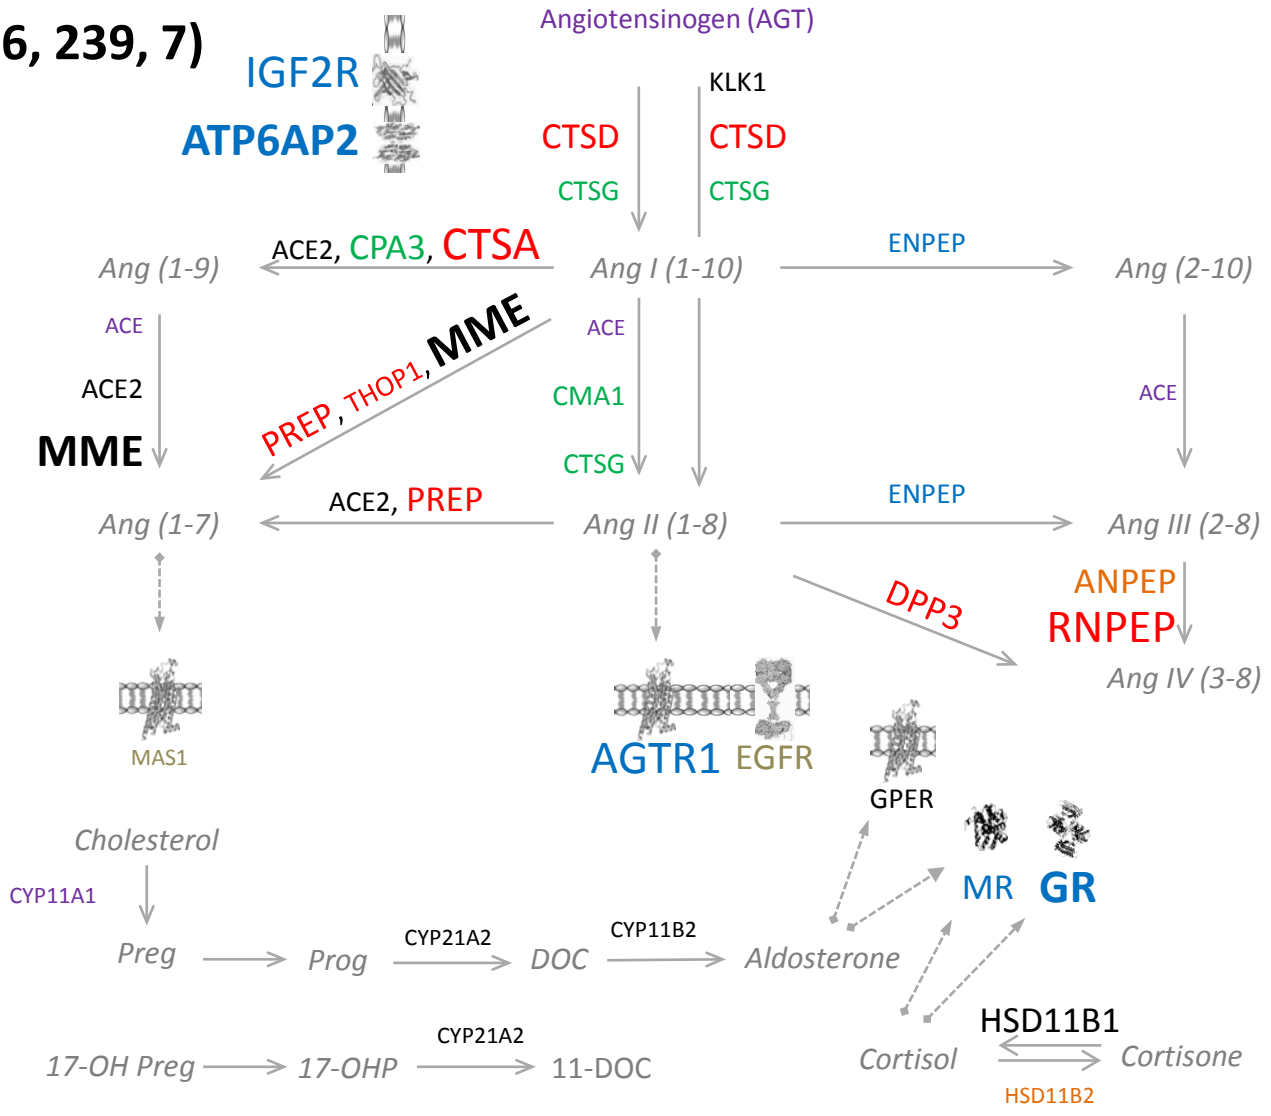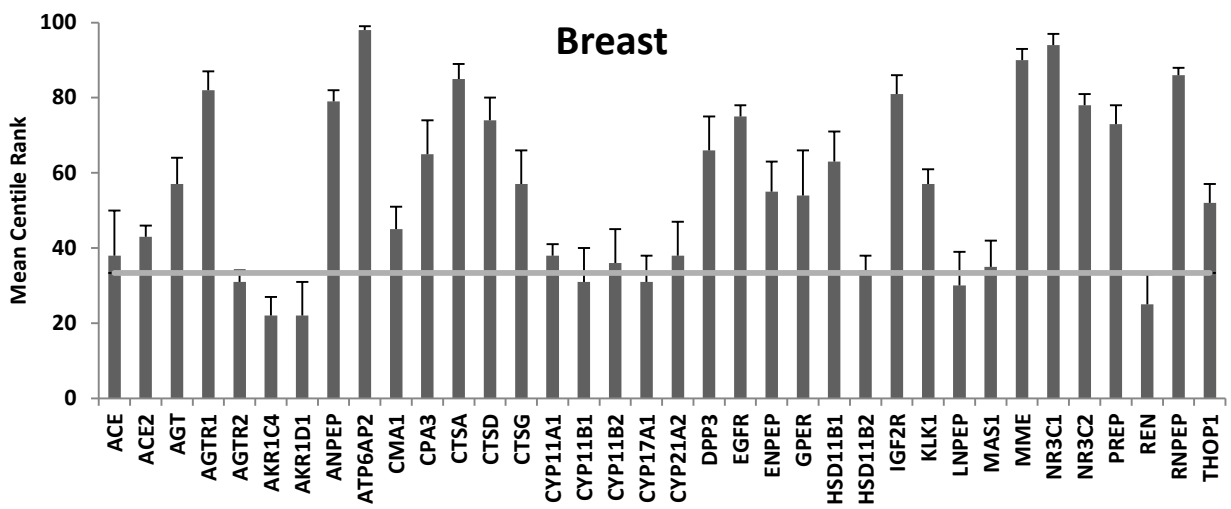

# Subcutaneous Adipose (9, 474, 8)

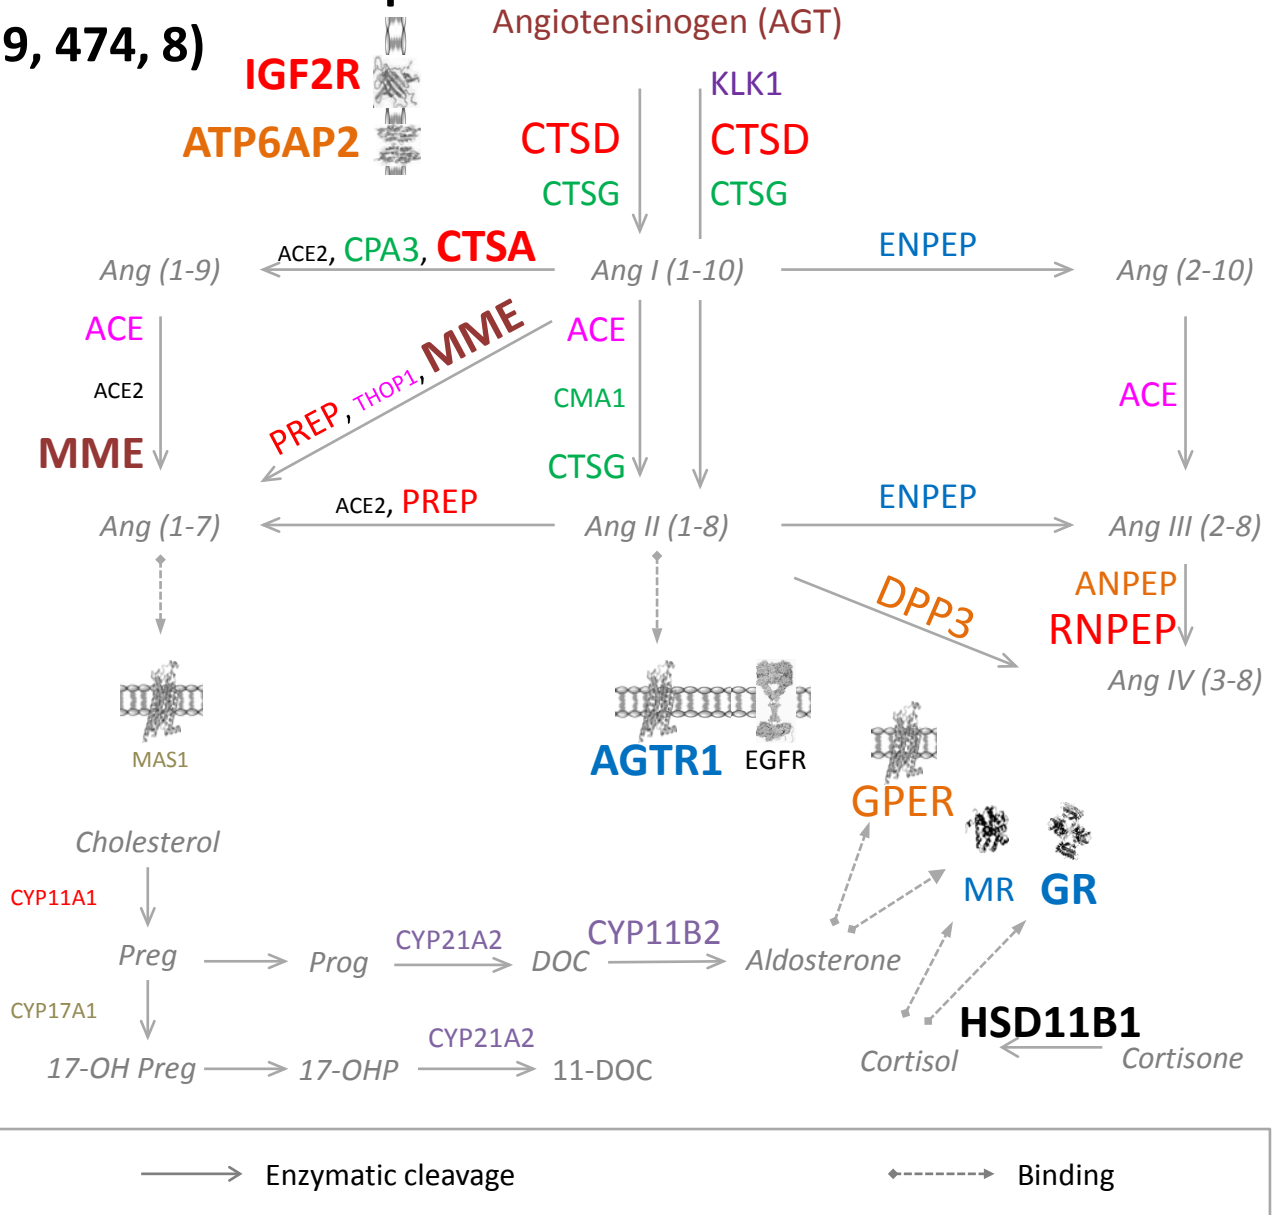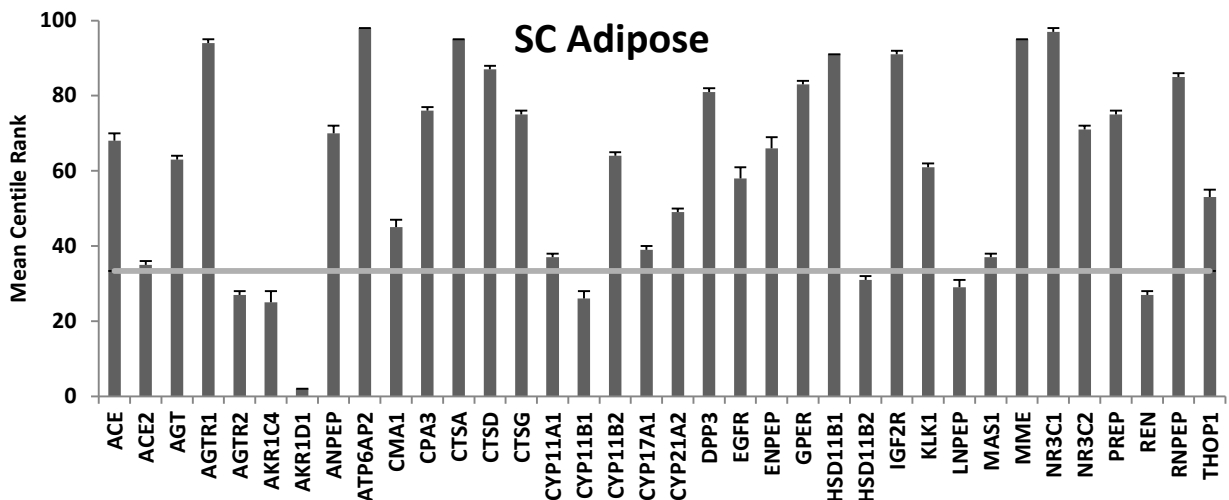

# Omental Adipose (4, 86, 5)

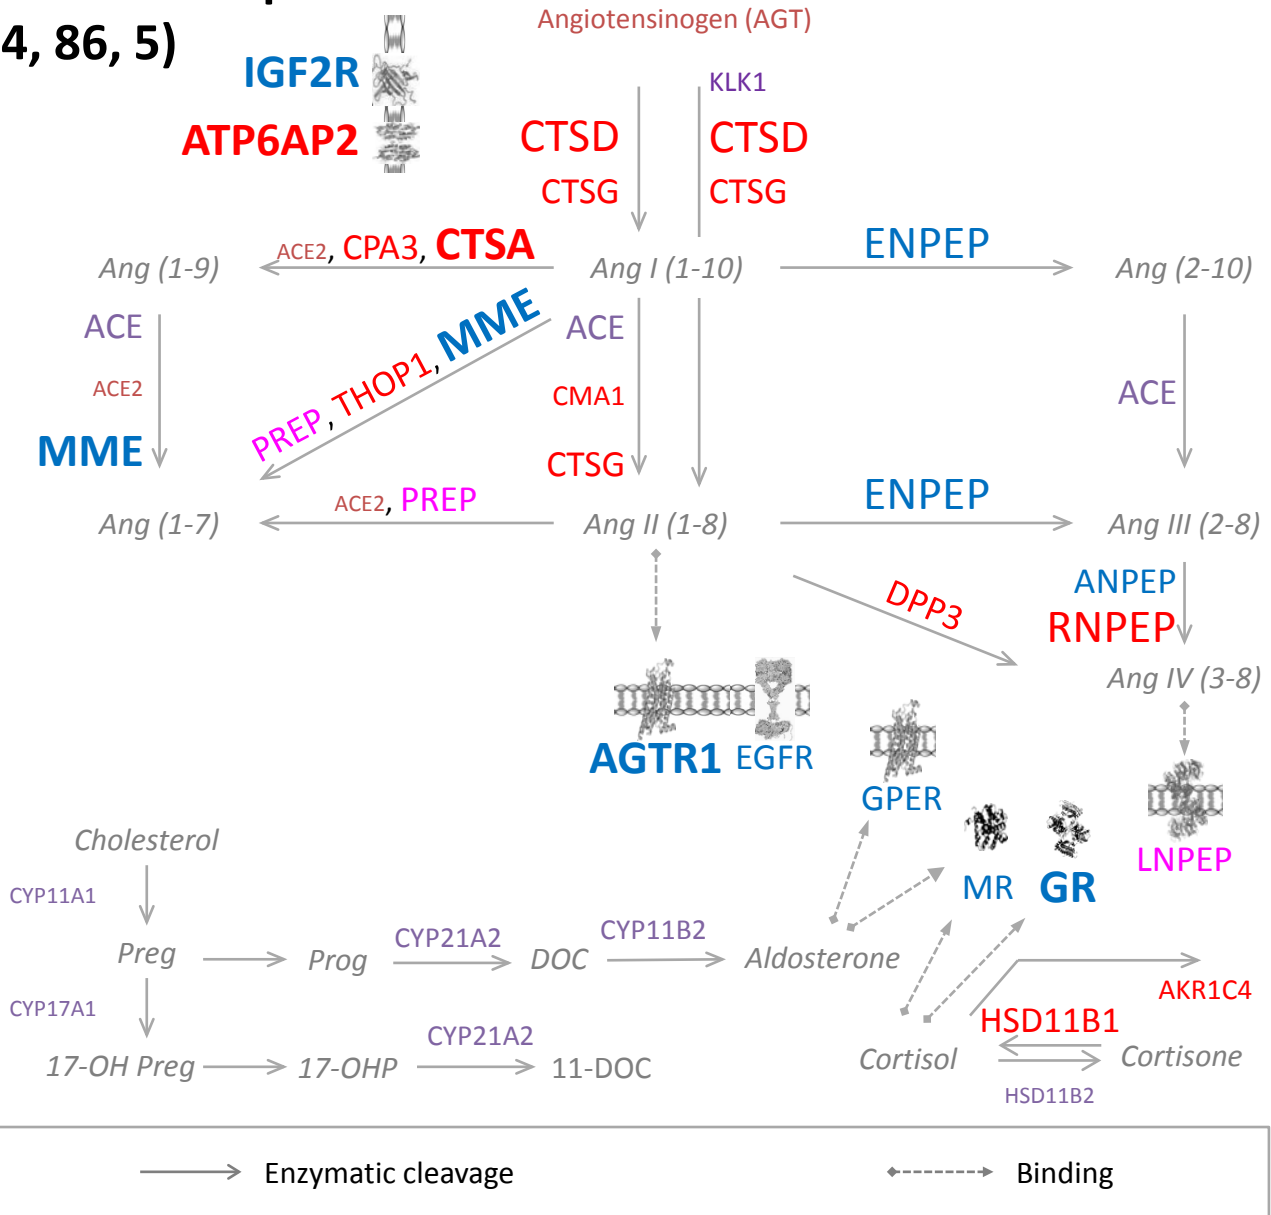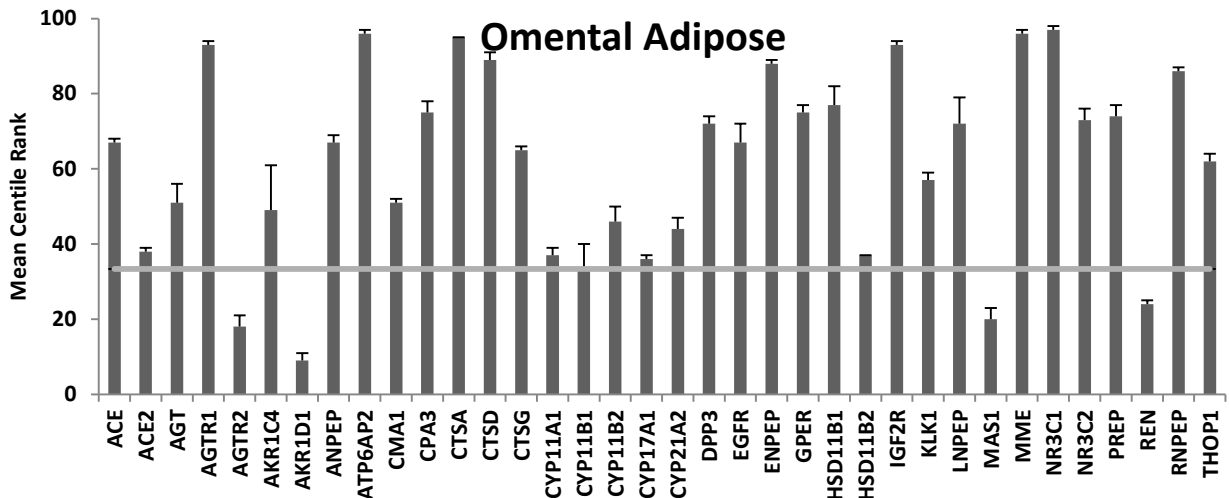

# Large Airways Epithelium

(5, 101, 8)

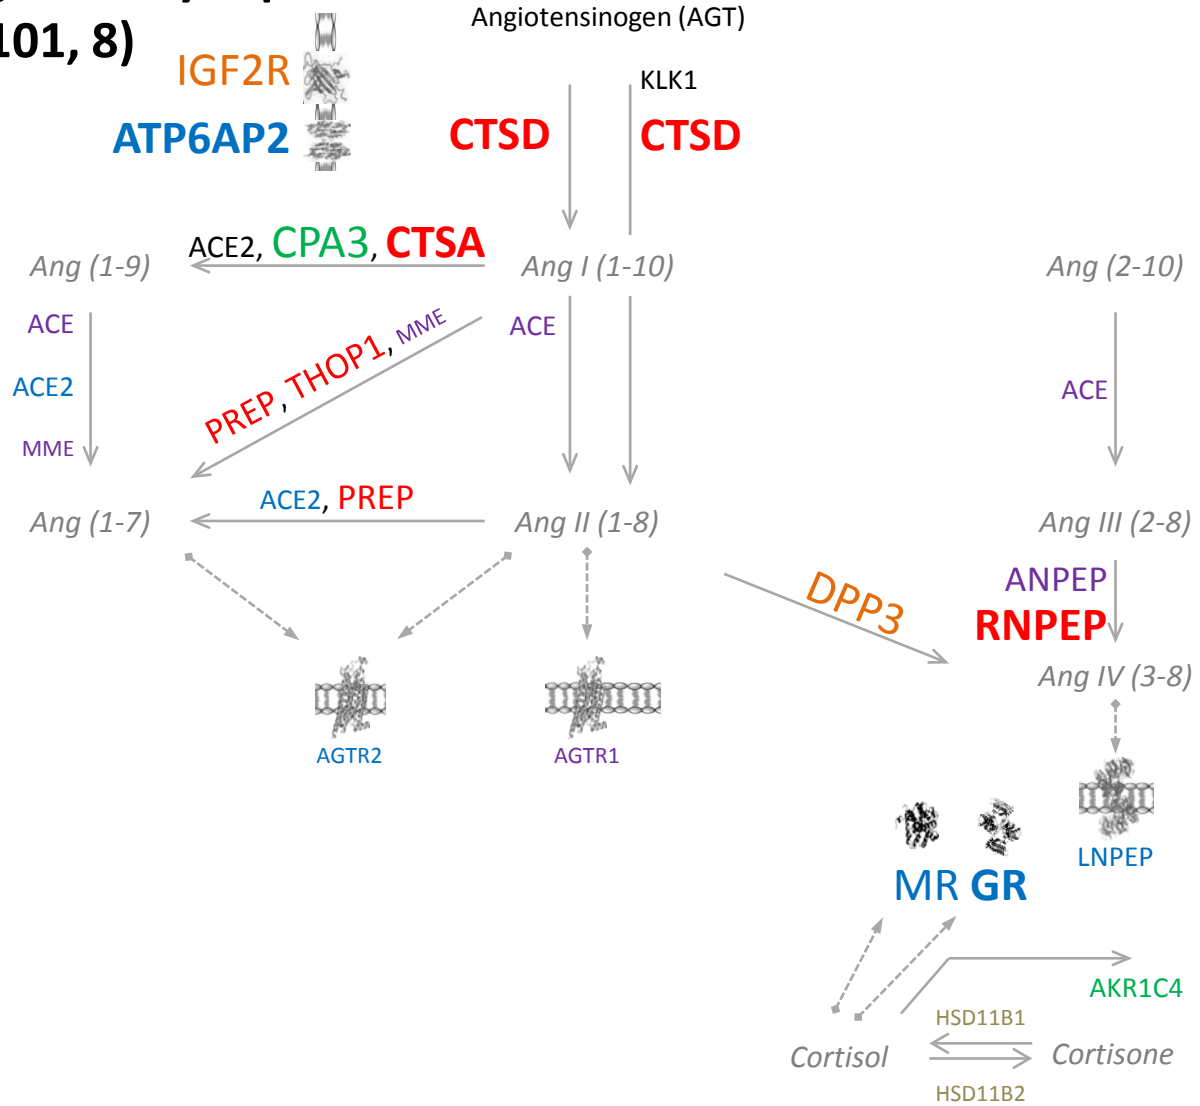

→ Enzymatic cleavage

⇌ Binding

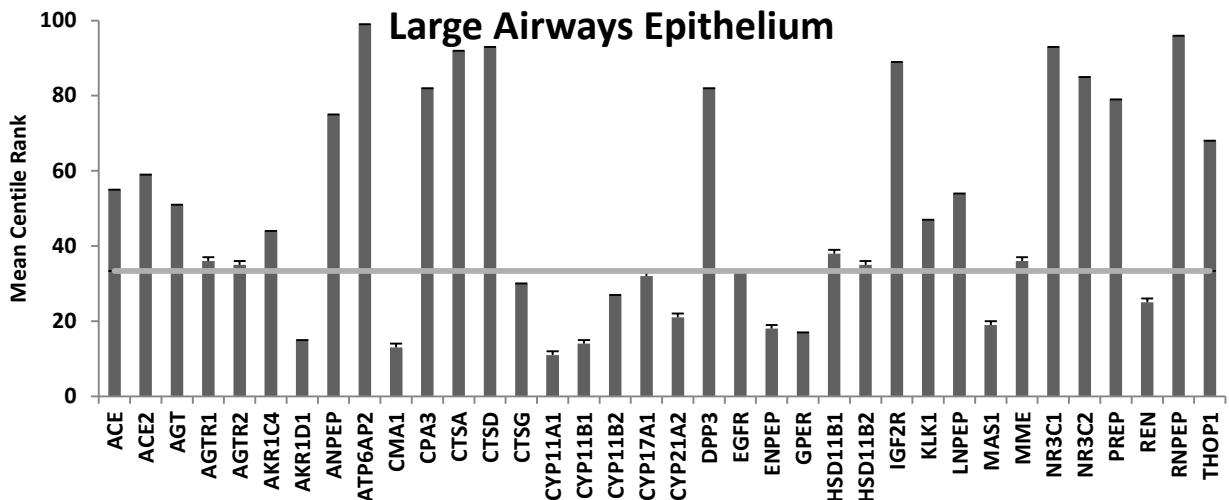

# Small Airways Epithelium (8, 57, 7)

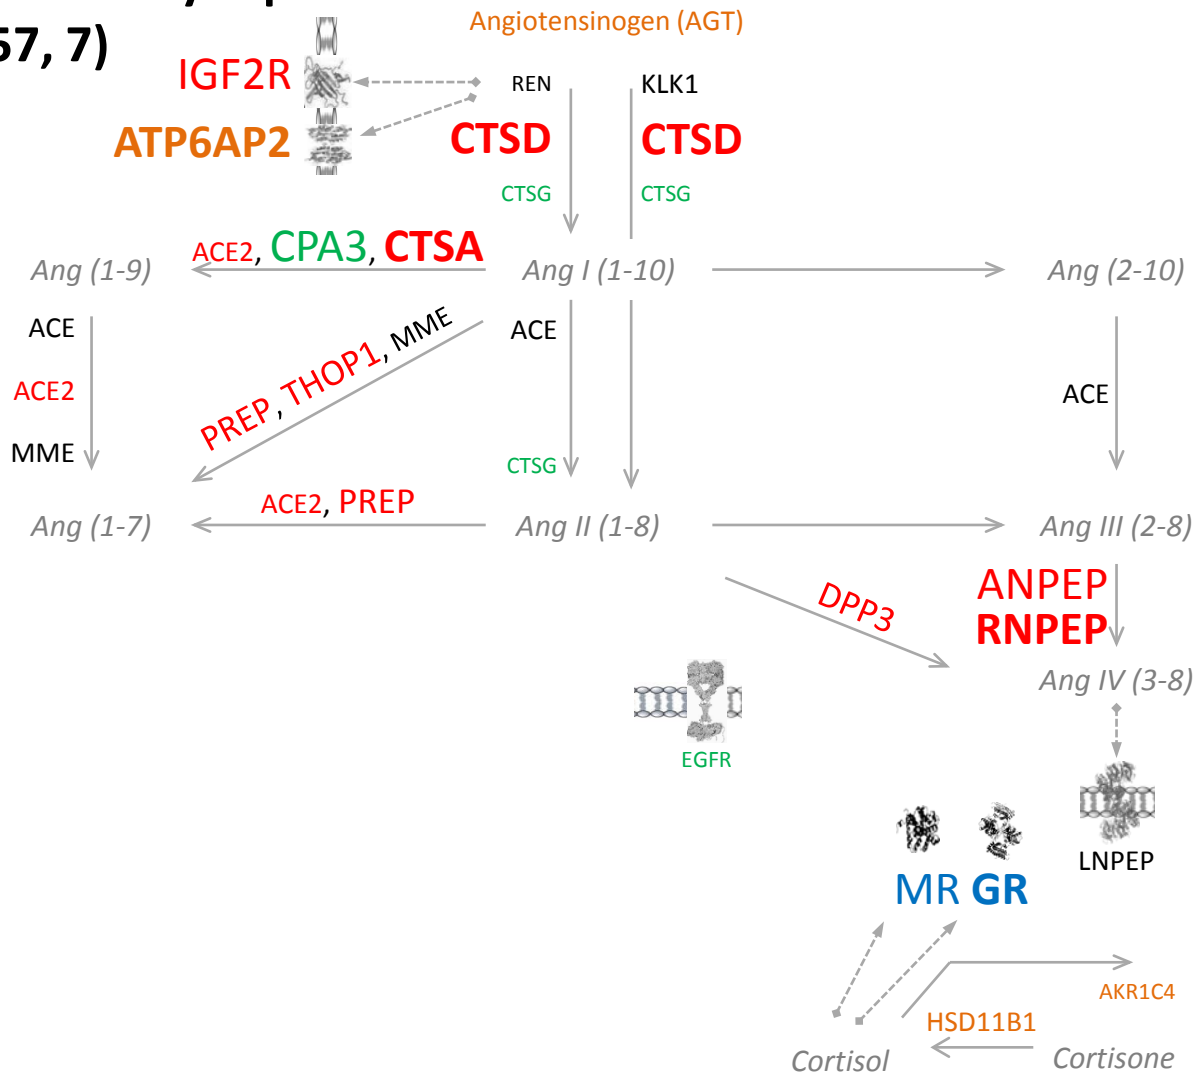

→ Enzymatic cleavage

⇌ Binding

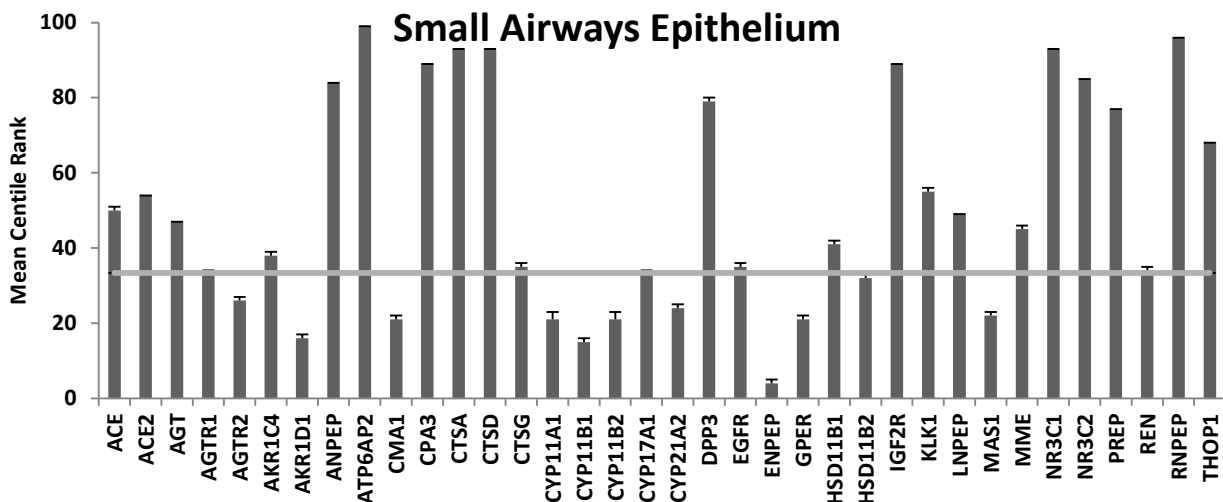

# Esophagus (3, 83, 6)

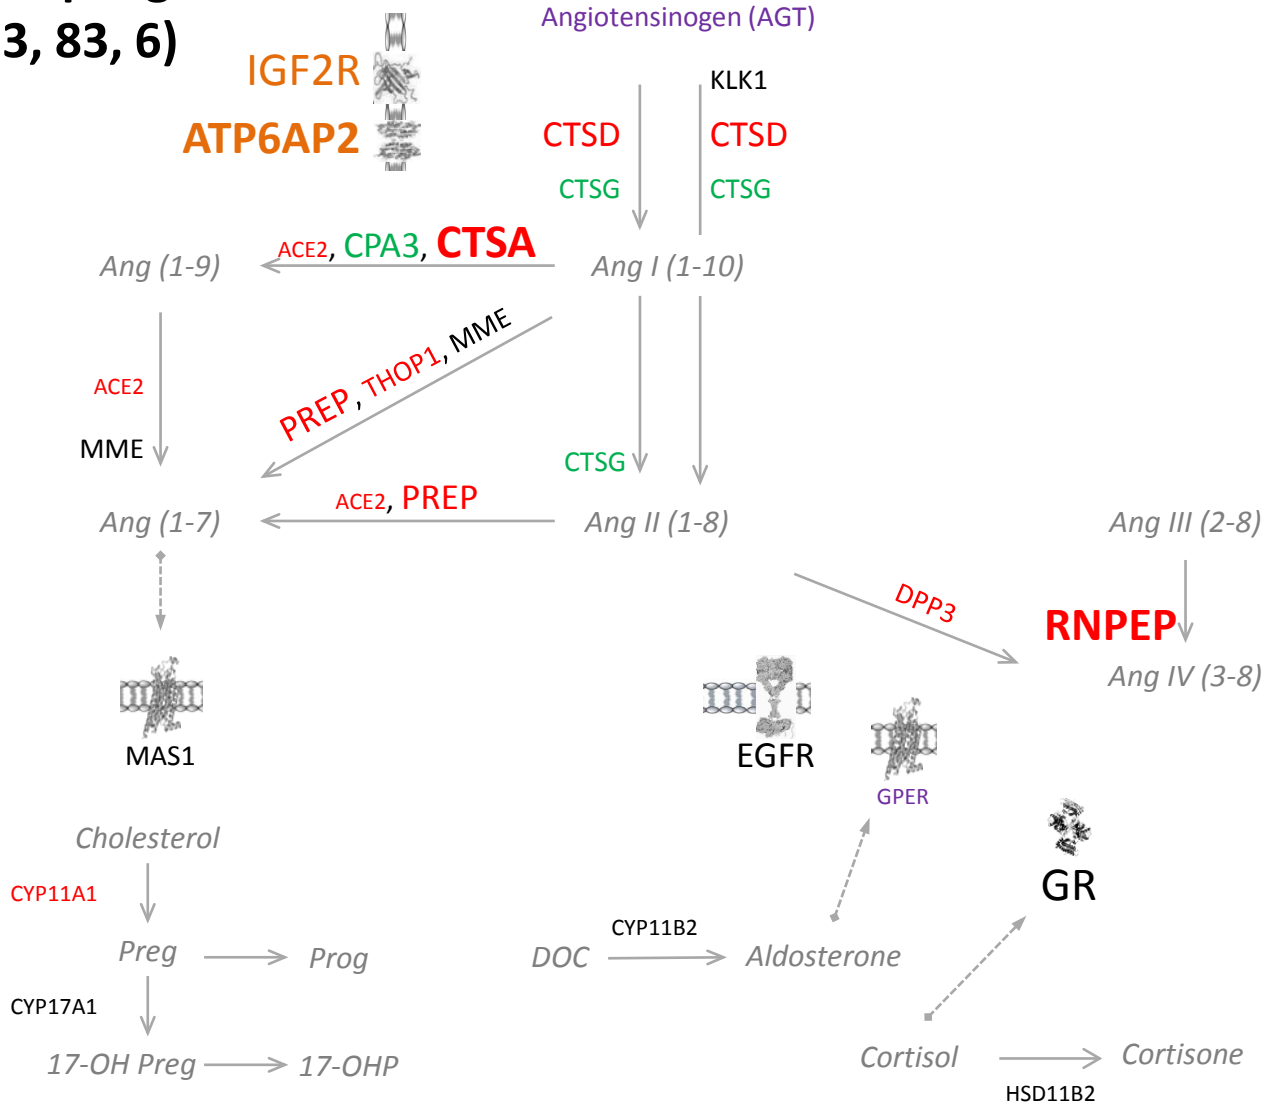

→ Enzymatic cleavage

◊ Binding

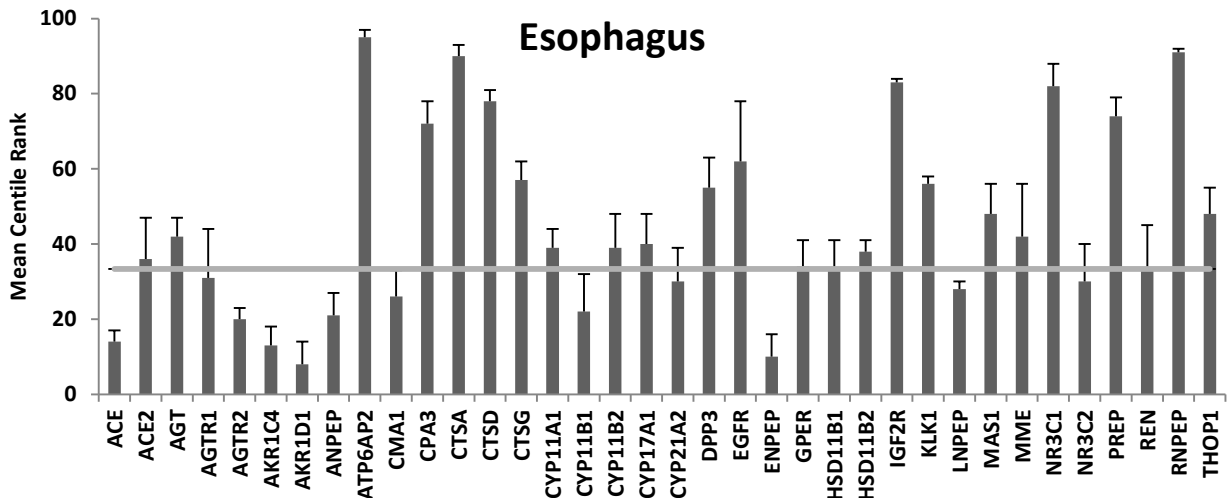

# Lymphocytes (6, 184, 7)

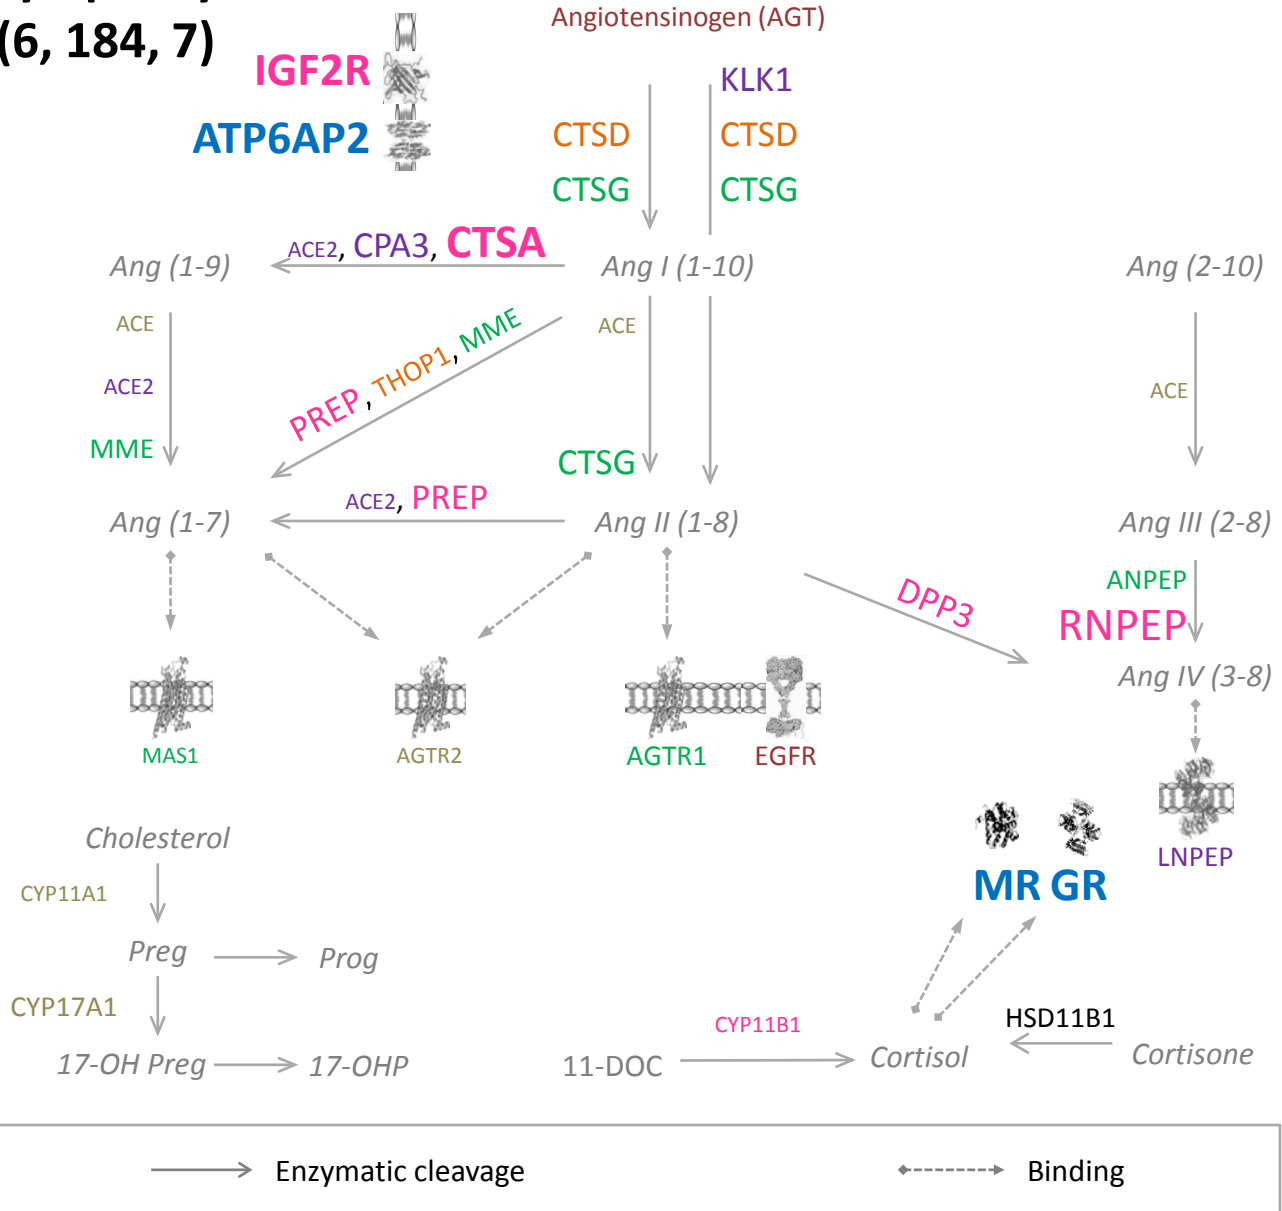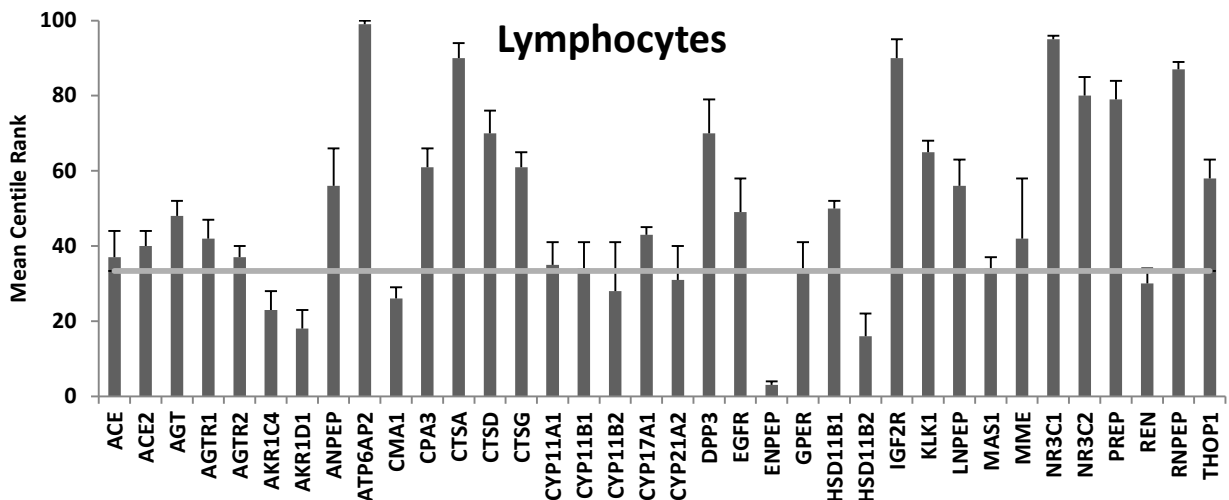



# Bone Marrow (8, 208, 8)

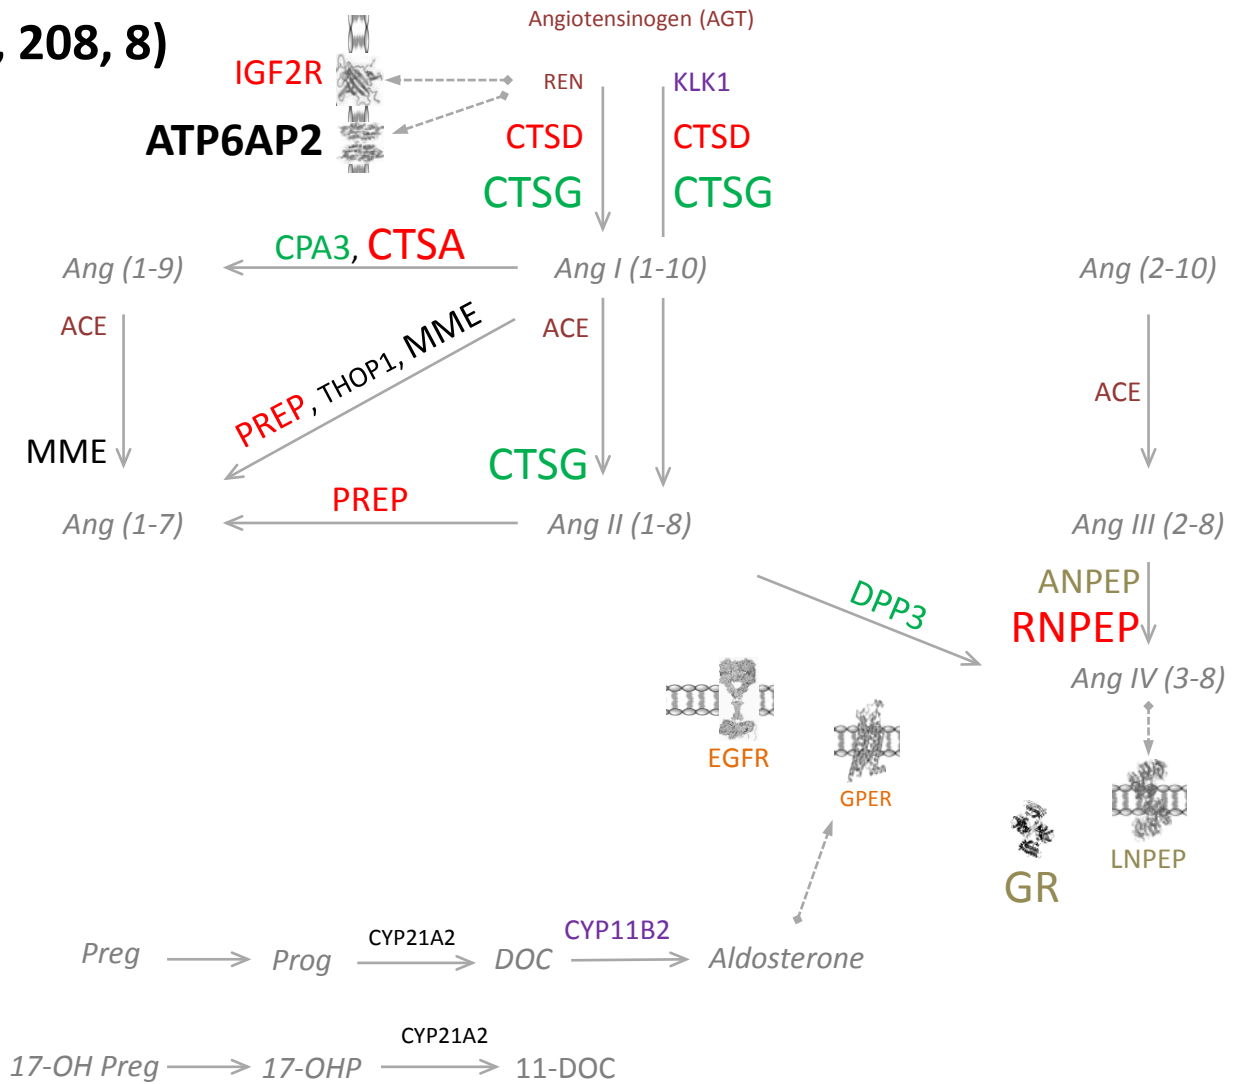

→ Enzymatic cleavage      ◊ Binding

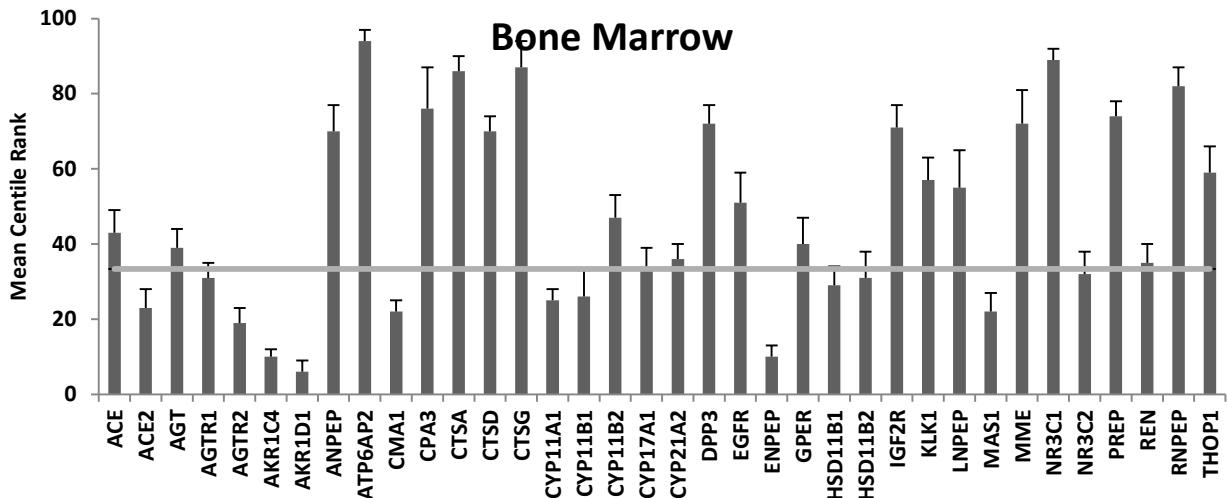

# Leukocytes (4, 222, 8)

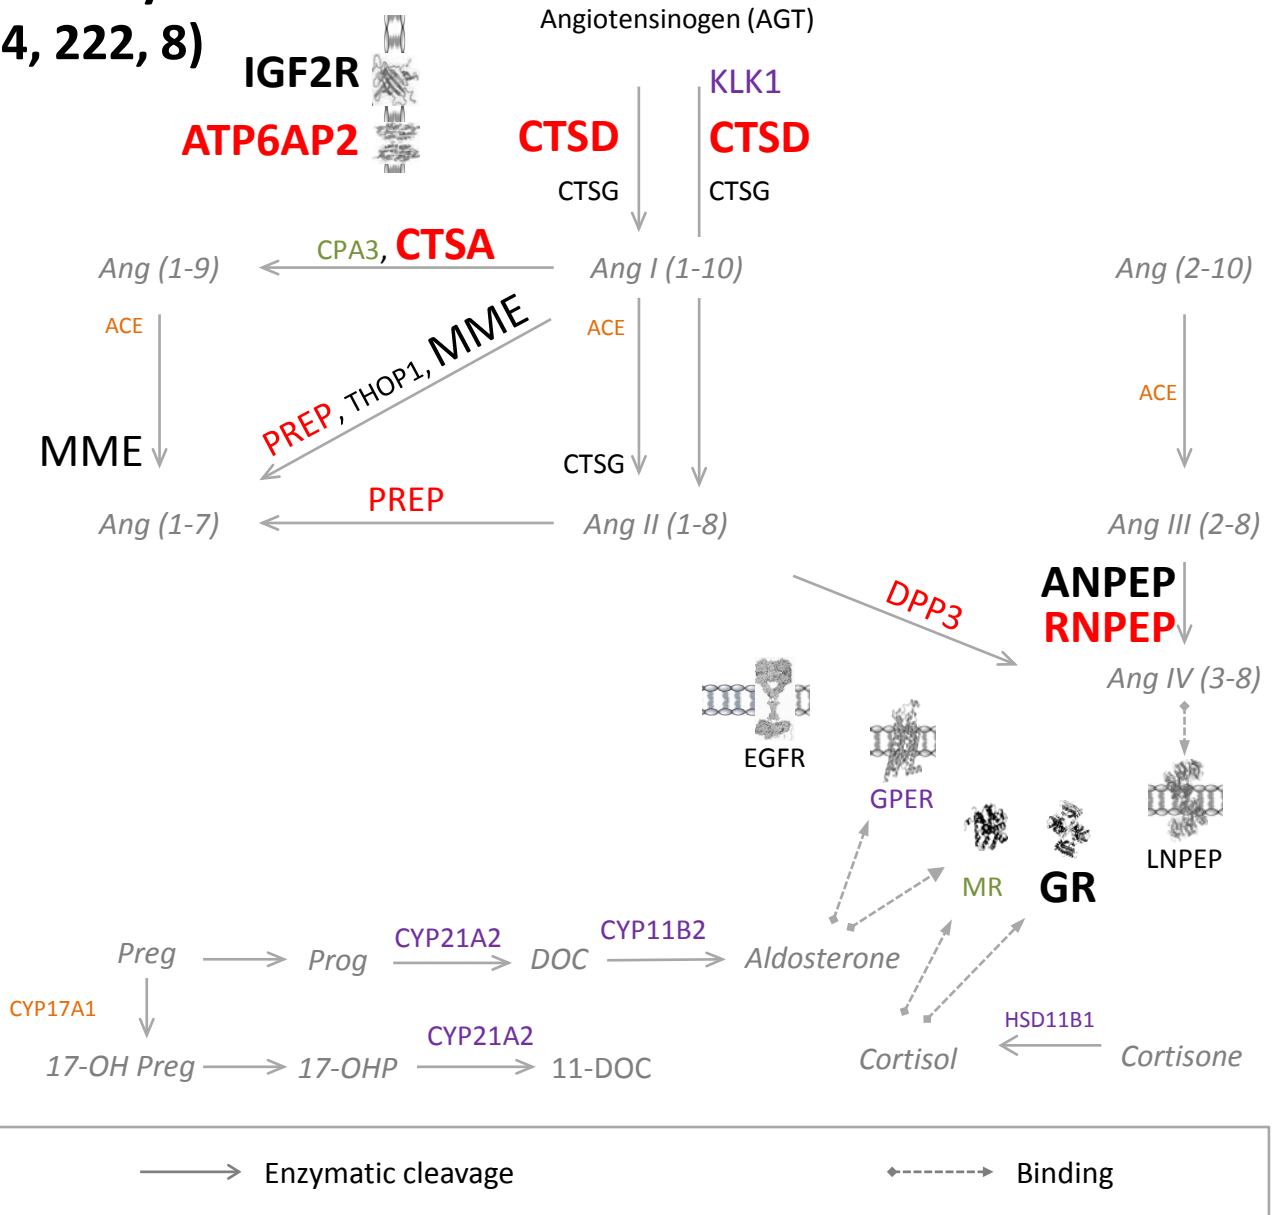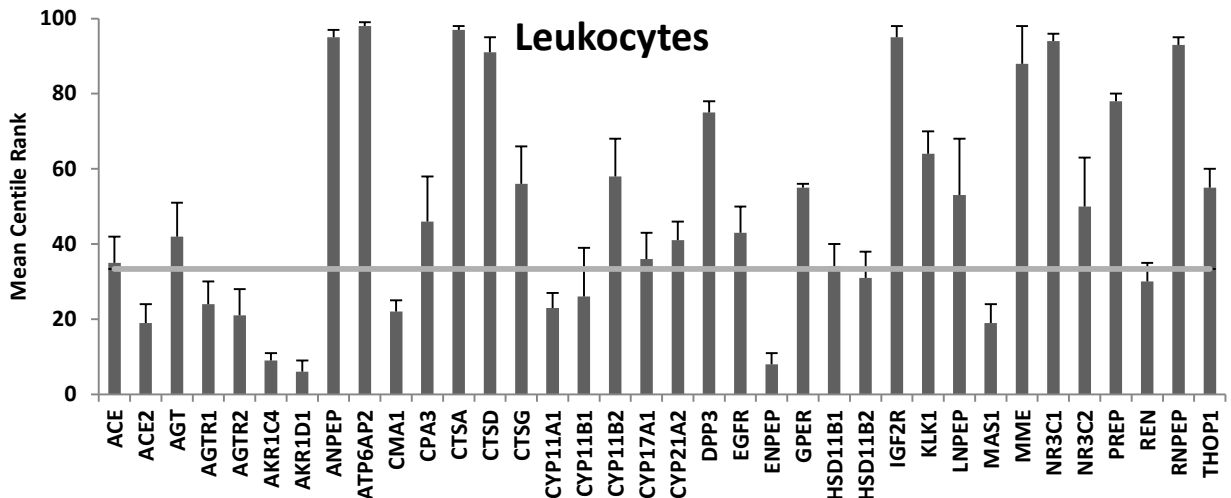

# Total Blood (17, 774, 5)

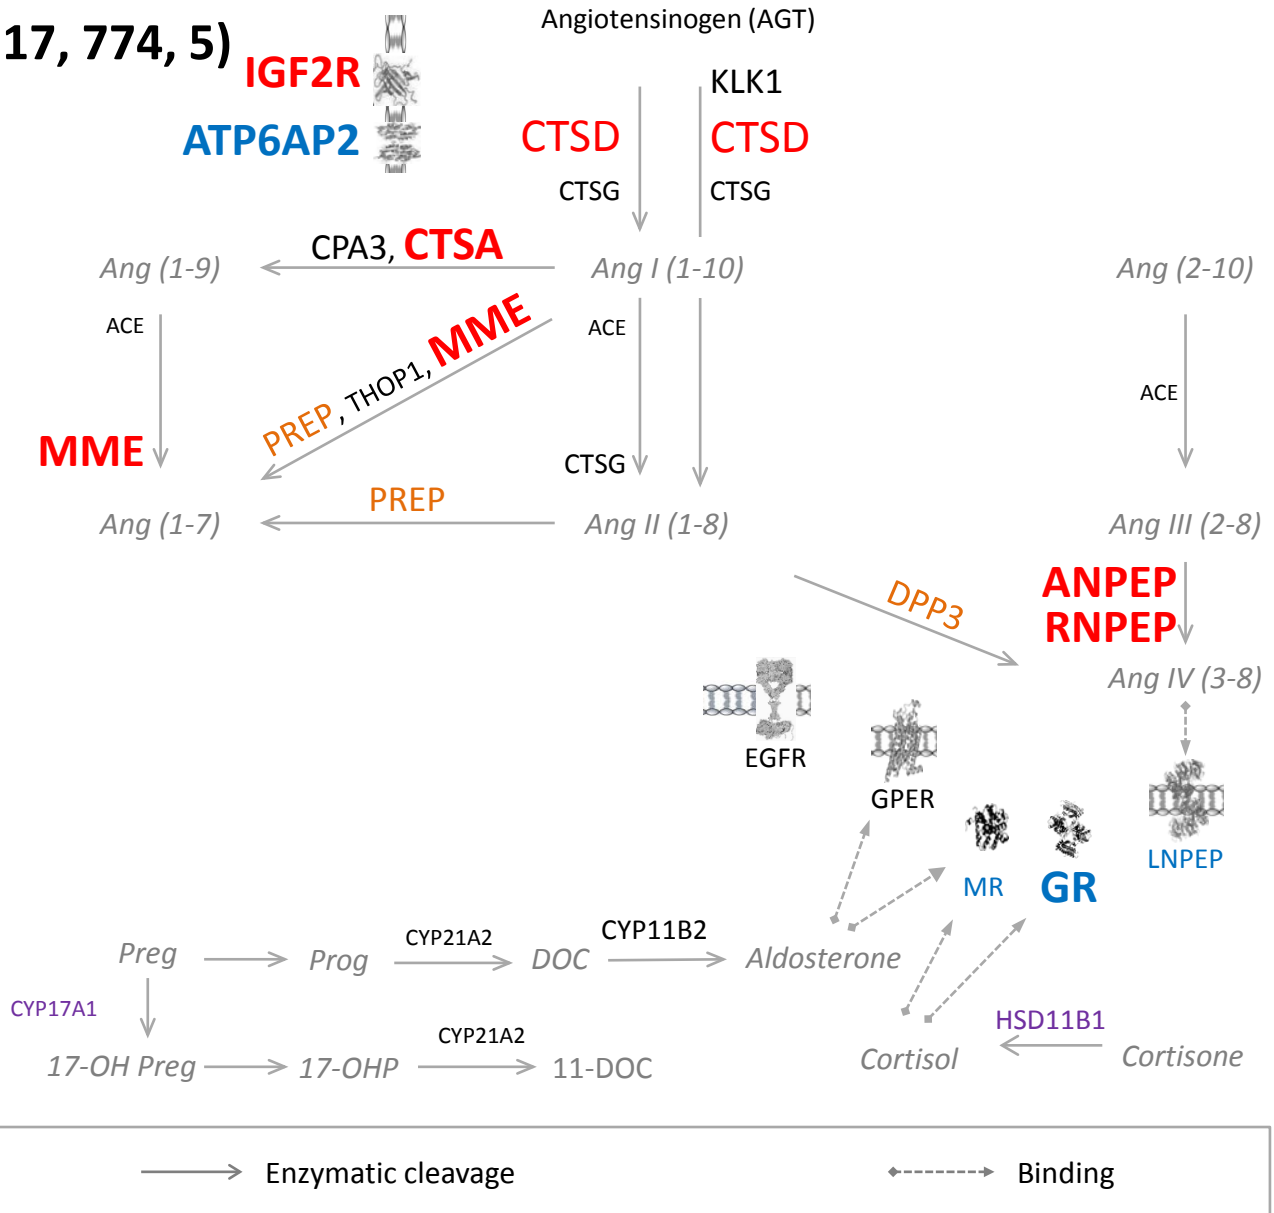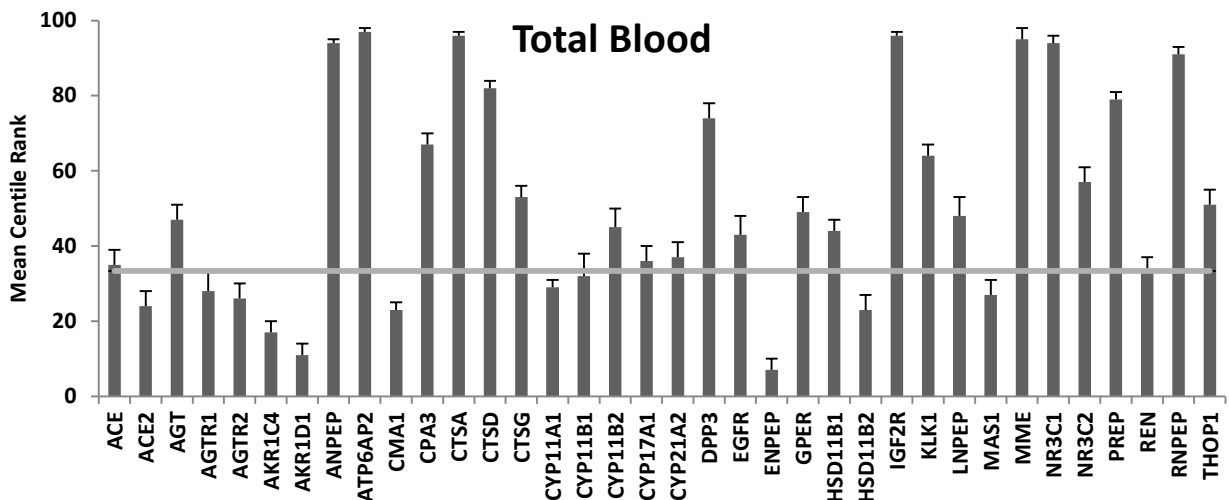

**PBMC**  
**(11, 303, 6)**

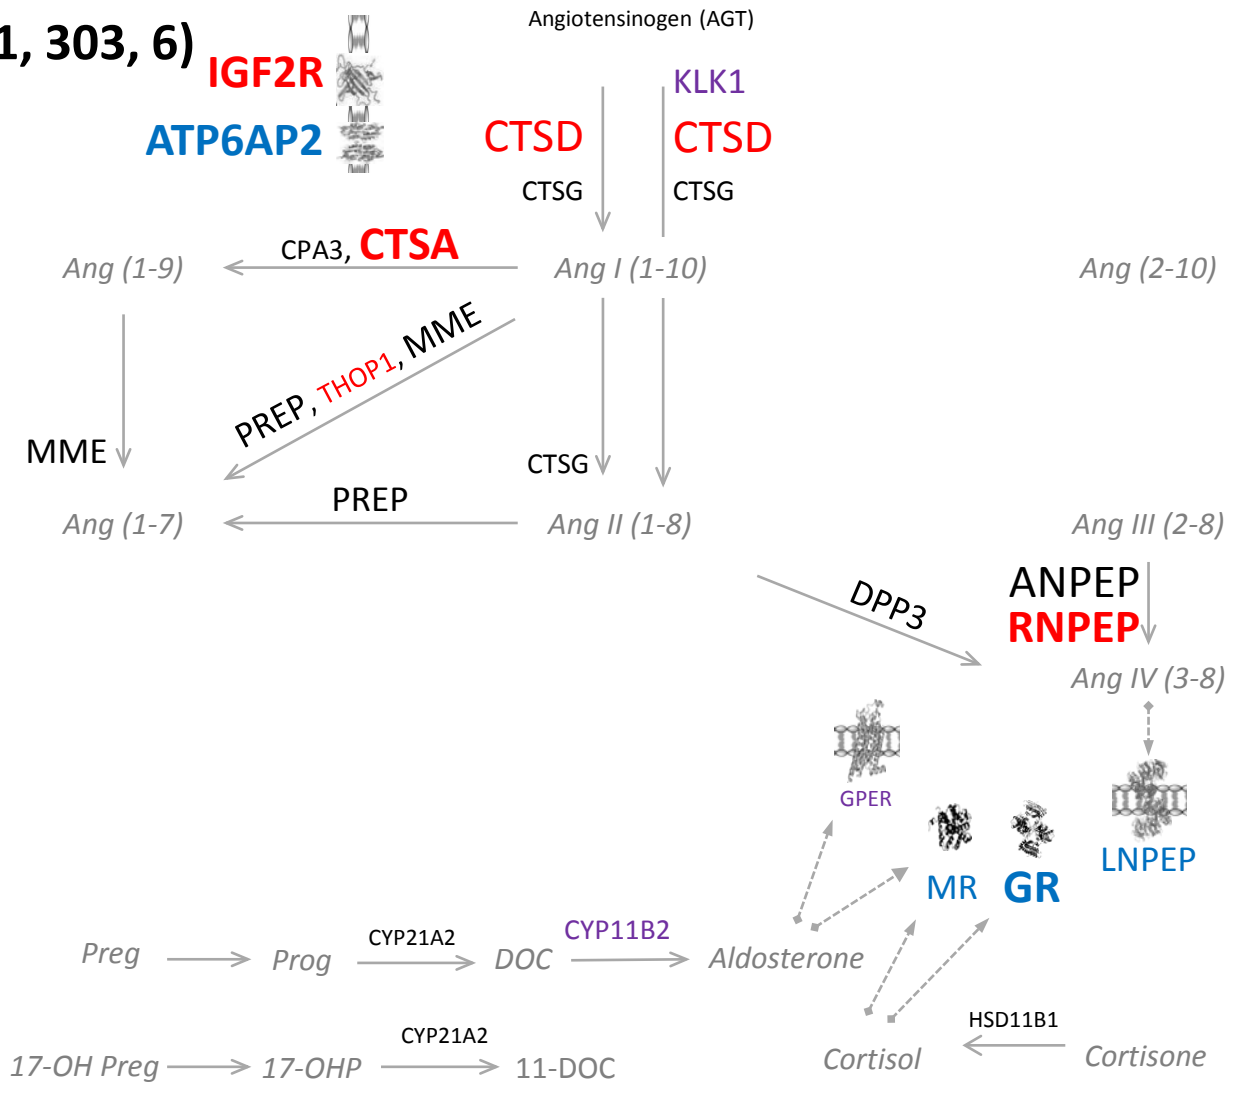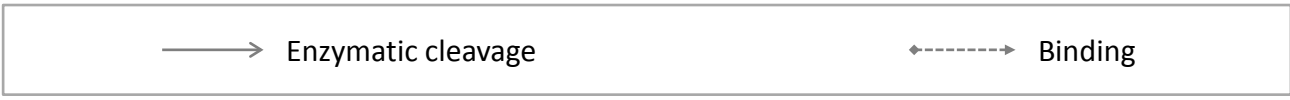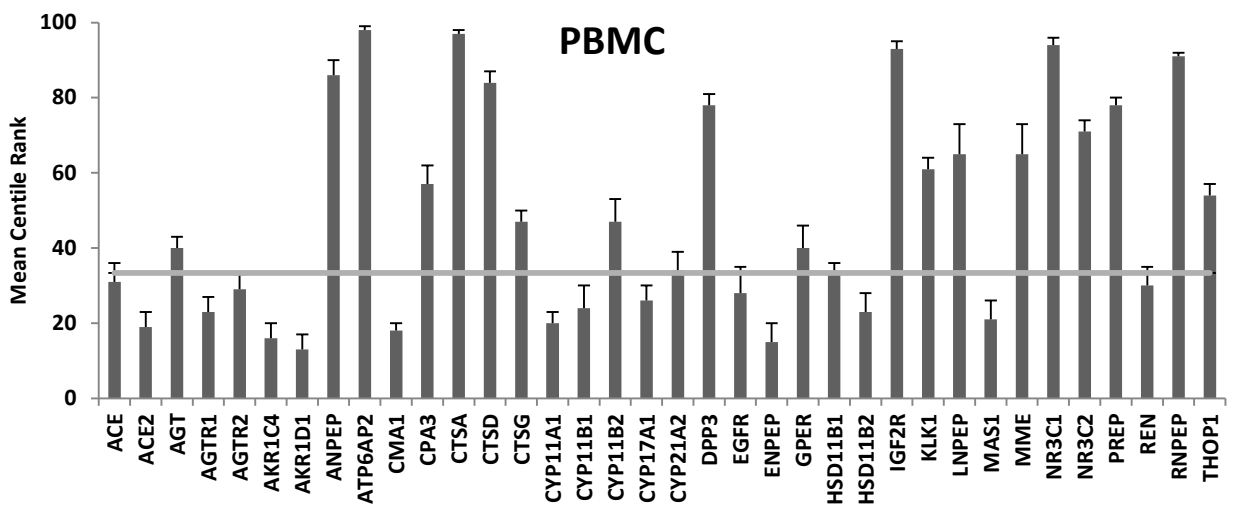

Supplement: srep10035-s1.pdf [file srep10035-s1.pdf]
